# Supplementary material for: Carfilzomib Improves Bone Metabolism in Patients with Advanced Relapsed/Refractory Multiple Myeloma: Results of the CarMMa Study
Source: MDPI journal article supplement (doi:10.3390/cancers13061257), 2021-03-12
Supplement: s1 [file s1]

Table S1. Biomarker values at each timepoint, by sex.

|                                  |        | Male      | Female    |                      |
|----------------------------------|--------|-----------|-----------|----------------------|
|                                  |        | n (%)     | n (%)     | p-value <sup>a</sup> |
| bALP (µg/L)                      |        |           |           |                      |
| bALP (µg/L) at baseline          | n      | 11        | 13        | >0.999               |
|                                  | Median | 11,1      | 10,7      |                      |
|                                  | Q1-Q3  | 8.9-11.7  | 9.3-11.5  |                      |
| bALP (µg/L) at 2 Months          | n      | 9         | 8         | 0,810                |
|                                  | Median | 11,7      | 12,6      |                      |
|                                  | Q1-Q3  | 8.0-17.5  | 9.6-14.2  |                      |
| bALP (µg/L) at 4 Months          | n      | 6         | 5         | 0,648                |
|                                  | Median | 11        | 11,9      |                      |
|                                  | Q1-Q3  | 8.9-14.4  | 11.6-12.9 |                      |
| bALP (µg/L) at 6 Months          | n      | 5         | 4         | 0,903                |
|                                  | Median | 13,6      | 12,7      |                      |
|                                  | Q1-Q3  | 7.1-14.8  | 9.8-14.3  |                      |
| bALP (µg/L) at 8 Months          | n      | 5         | 3         | 0,766                |
|                                  | Median | 15        | 16,9      |                      |
|                                  | Q1-Q3  | 6.8-16.9  | 3.8-19.6  |                      |
| bALP (µg/L) at 10 Months         | n      | 5         | 2         | >0.999               |
|                                  | Median | 15        | 12,5      |                      |
|                                  | Q1-Q3  | 9.8-15.8  | 7.0-18.1  |                      |
| bALP (µg/L) at 12 Months         | n      | 2         | 0         |                      |
|                                  | Median | 17,1      | .         |                      |
|                                  | Q1-Q3  | 14.5-19.7 | .-.       |                      |
| Osteocalcin (ng/ml)              |        |           |           |                      |
| Osteocalcin (ng/ml) at baseline  | n      | 11        | 13        | 0,082                |
|                                  | Median | 6,6       | 10,1      |                      |
|                                  | Q1-Q3  | 2.5-11.2  | 7.5-11.9  |                      |
| Osteocalcin (ng/ml) at 2 Months  | n      | 9         | 8         | 0,810                |
|                                  | Median | 10,5      | 10,8      |                      |
|                                  | Q1-Q3  | 8.8-14.1  | 7.6-16.0  |                      |
| Osteocalcin (ng/ml) at 4 Months  | n      | 6         | 5         | <b>0,036</b>         |
|                                  | Median | 10,5      | 19,2      |                      |
|                                  | Q1-Q3  | 8.6-12.4  | 17.2-19.4 |                      |
| Osteocalcin (ng/ml) at 6 Months  | n      | 5         | 4         | 0,270                |
|                                  | Median | 12,8      | 22,2      |                      |
|                                  | Q1-Q3  | 11.1-13.9 | 11.4-26.1 |                      |
| Osteocalcin (ng/ml) at 8 Months  | n      | 5         | 3         | 0,371                |
|                                  | Median | 14,9      | 29,8      |                      |
|                                  | Q1-Q3  | 8.5-16.9  | 6.0-40.1  |                      |
| Osteocalcin (ng/ml) at 10 Months | n      | 5         | 2         | >0.999               |
|                                  | Median | 16,8      | 15,5      |                      |
|                                  | Q1-Q3  | 8.9-17.7  | 2.8-28.2  |                      |
| Osteocalcin (ng/ml) at 12 Months | n      | 2         | 0         |                      |
|                                  | Median | 17,1      | .         |                      |
|                                  | Q1-Q3  | 13.3-20.8 | .-.       |                      |
| PINP (pg/ml)                     |        |           |           |                      |
| PINP (pg/ml) at baseline         | n      | 11        | 13        | 0,602                |
|                                  | Median | 583.2     | 537       |                      |

|                            |                |             |             |       |
|----------------------------|----------------|-------------|-------------|-------|
|                            | Q1-Q3          | 310.5-750.7 | 253.1-742.1 |       |
| PINP (pg/ml) at 2 Months   | n              | 9           | 8           | 0,962 |
|                            | Median         | 384,9       | 467,5       |       |
|                            | Q1-Q3          | 226.3-710.7 | 204.2-897.9 |       |
| PINP (pg/ml) at 4 Months   | n              | 6           | 5           | 0,927 |
|                            | Median         | 486,8       | 490,2       |       |
|                            | Q1-Q3          | 411.6-777.5 | 439.2-601.4 |       |
| PINP (pg/ml) at 6 Months   | n              | 5           | 4           | 0,391 |
|                            | Median         | 698,7       | 429,5       |       |
|                            | Q1-Q3          | 442.8-789.0 | 257.6-1067  |       |
| PINP (pg/ml) at 8 Months   | n              | 5           | 3           | 0,551 |
|                            | Median         | 1004        | 541,1       |       |
|                            | Q1-Q3          | 765.5-1988  | 198.9-2156  |       |
| PINP (pg/ml) at 10 Months  | n              | 5           | 2           | 0,333 |
|                            | Median         | 1261        | 503,3       |       |
|                            | Q1-Q3          | 652.0-2567  | 447.6-559.0 |       |
| PINP (pg/ml) at 12 Months  | n              | 2           | 0           |       |
|                            | Median         | 992,5       | .           |       |
|                            | Q1-Q3          | 701.3-1284  | .-.         |       |
|                            | CTX(ng/ml)     |             |             |       |
| CTX(ng/ml) at baseline     | n              | 11          | 13          | 0,164 |
|                            | Median         | 0,3         | 0,8         |       |
|                            | Q1-Q3          | 0.2-1.0     | 0.7-0.9     |       |
| CTX(ng/ml) at 2 Months     | n              | 9           | 8           | 0,336 |
|                            | Median         | 0,3         | 0,5         |       |
|                            | Q1-Q3          | 0.2-0.5     | 0.3-0.7     |       |
| CTX(ng/ml) at 4 Months     | n              | 6           | 5           | 0,784 |
|                            | Median         | 0,3         | 0,3         |       |
|                            | Q1-Q3          | 0.2-0.5     | 0.2-0.3     |       |
| CTX(ng/ml) at 6 Months     | n              | 5           | 4           | 0,903 |
|                            | Median         | 0,2         | 0,2         |       |
|                            | Q1-Q3          | 0.2-0.4     | 0.2-0.5     |       |
| CTX(ng/ml) at 8 Months     | n              | 5           | 3           | 0,551 |
|                            | Median         | 0,1         | 0,2         |       |
|                            | Q1-Q3          | 0.1-0.3     | 0.1-0.5     |       |
| CTX(ng/ml) at 10 Months    | n              | 5           | 2           | 0,846 |
|                            | Median         | 0,1         | 0,2         |       |
|                            | Q1-Q3          | 0.1-0.3     | 0.2-0.2     |       |
| CTX(ng/ml) at 12 Months    | n              | 2           | 0           |       |
|                            | Median         | 0,3         | .           |       |
|                            | Q1-Q3          | 0.2-0.4     | .-.         |       |
|                            | TRACP-5B (U/L) |             |             |       |
| TRACP-5B (U/L) at baseline | n              | 11          | 13          | 0,247 |
|                            | Median         | 1,9         | 3,6         |       |
|                            | Q1-Q3          | 1.3-4.3     | 3.3-3.9     |       |
| TRACP-5B (U/L) at 2 Months | n              | 9           | 8           | 0,736 |
|                            | Median         | 1,8         | 1,9         |       |
|                            | Q1-Q3          | 1.0-2.0     | 1.2-2.2     |       |
| TRACP-5B (U/L) at 4 Months | n              | 6           | 5           | 0,235 |
|                            | Median         | 1,1         | 1,3         |       |

|                             |                        |         |         |        |
|-----------------------------|------------------------|---------|---------|--------|
| TRACP-5B (U/L) at 6 Months  | Q1-Q3                  | 0.7-1.9 | 1.2-2.1 | 0,391  |
|                             | n                      | 5       | 4       |        |
|                             | Median                 | 1,1     | 1,6     |        |
| TRACP-5B (U/L) at 8 Months  | Q1-Q3                  | 1.0-1.7 | 1.2-1.9 | 0,551  |
|                             | n                      | 5       | 3       |        |
|                             | Median                 | 1       | 1       |        |
| TRACP-5B (U/L) at 10 Months | Q1-Q3                  | 0.9-1.1 | 0.6-1.0 | 0,724  |
|                             | n                      | 4       | 1       |        |
|                             | Median                 | 0,9     | 0,9     |        |
| TRACP-5B (U/L) at 12 Months | Q1-Q3                  | 0.8-1.4 | 0.9-0.9 |        |
|                             | n                      | 2       | 0       |        |
|                             | Median                 | 1,3     | .       |        |
|                             | Q1-Q3                  | 0.9-1.8 | .-.     |        |
|                             | <b>RANKL (pmol/L)</b>  |         |         |        |
| RANKL (pmol/L) at baseline  | n                      | 11      | 13      | 0,224  |
|                             | Median                 | 0,2     | 0,3     |        |
|                             | Q1-Q3                  | 0.1-0.4 | 0.2-0.4 |        |
| RANKL (pmol/L) at 2 Months  | n                      | 9       | 8       | 0,413  |
|                             | Median                 | 0,2     | 0,2     |        |
|                             | Q1-Q3                  | 0.1-0.2 | 0.1-0.2 |        |
| RANKL (pmol/L) at 4 Months  | n                      | 6       | 5       | 0,083  |
|                             | Median                 | 0,1     | 0,1     |        |
|                             | Q1-Q3                  | 0.1-0.2 | 0.1-0.1 |        |
| RANKL (pmol/L) at 6 Months  | n                      | 5       | 4       | 0,178  |
|                             | Median                 | 0,1     | 0,1     |        |
|                             | Q1-Q3                  | 0.1-0.2 | 0.1-0.1 |        |
| RANKL (pmol/L) at 8 Months  | n                      | 5       | 3       | >0.999 |
|                             | Median                 | 0,1     | 0,1     |        |
|                             | Q1-Q3                  | 0.1-0.1 | 0.0-0.1 |        |
| RANKL (pmol/L) at 10 Months | n                      | 5       | 2       | 0,561  |
|                             | Median                 | 0,1     | 0,1     |        |
|                             | Q1-Q3                  | 0.1-0.2 | 0.0-0.1 |        |
| RANKL (pmol/L) at 12 Months | n                      | 2       | 0       |        |
|                             | Median                 | 0,1     | .       |        |
|                             | Q1-Q3                  | 0.1-0.2 | .-.     |        |
|                             | <b>RANKL/OPG ratio</b> |         |         |        |
| RANKL/OPG ratio at baseline | n                      | 11      | 13      | 0,297  |
|                             | Median                 | 0       | 0,1     |        |
|                             | Q1-Q3                  | 0.0-0.1 | 0.1-0.1 |        |
| RANKL/OPG ratio at 2 Months | n                      | 9       | 8       | 0,361  |
|                             | Median                 | 0       | 0       |        |
|                             | Q1-Q3                  | 0.0-0.1 | 0.0-0.0 |        |
| RANKL/OPG ratio at 4 Months | n                      | 6       | 5       | 0,121  |
|                             | Median                 | 0       | 0       |        |
|                             | Q1-Q3                  | 0.0-0.0 | 0.0-0.0 |        |
| RANKL/OPG ratio at 6 Months | n                      | 5       | 4       | 0,713  |
|                             | Median                 | 0       | 0       |        |
|                             | Q1-Q3                  | 0.0-0.0 | 0.0-0.0 |        |
| RANKL/OPG ratio at 8 Months | n                      | 5       | 3       | 0,766  |
|                             | Median                 | 0       | 0       |        |

|                              |        |           |           |       |
|------------------------------|--------|-----------|-----------|-------|
| RANKL/OPG ratio at 10 Months | Q1-Q3  | 0.0-0.0   | 0.0-0.0   | 0,333 |
|                              | n      | 5         | 2         |       |
|                              | Median | 0         | 0         |       |
| RANKL/OPG ratio at 12 Months | Q1-Q3  | 0.0-0.0   | 0.0-0.0   |       |
|                              | n      | 2         | 0         |       |
|                              | Median | 0         | .         |       |
|                              | Q1-Q3  | 0.0-0.0   | .-.       |       |
| SOST (pmol/L)                |        |           |           |       |
| SOST (pmol/L) at baseline    | n      | 11        | 13        | 0,817 |
|                              | Median | 44,8      | 50,3      |       |
|                              | Q1-Q3  | 33.2-66.3 | 40.2-64.1 |       |
| SOST (pmol/L) at 2 Months    | n      | 9         | 8         | 0,597 |
|                              | Median | 37,2      | 38,9      |       |
|                              | Q1-Q3  | 33.8-40.1 | 25.7-66.7 |       |
| SOST (pmol/L) at 4 Months    | n      | 6         | 5         | 0,523 |
|                              | Median | 40        | 32,8      |       |
|                              | Q1-Q3  | 29.7-45.8 | 25.0-33.2 |       |
| SOST (pmol/L) at 6 Months    | n      | 5         | 4         | 0,178 |
|                              | Median | 48,1      | 24,4      |       |
|                              | Q1-Q3  | 31.8-92.9 | 22.3-44.5 |       |
| SOST (pmol/L) at 8 Months    | n      | 5         | 3         | 0,551 |
|                              | Median | 29,9      | 26,2      |       |
|                              | Q1-Q3  | 23.5-63.5 | 20.4-44.3 |       |
| SOST (pmol/L) at 10 Months   | n      | 5         | 2         | 0,846 |
|                              | Median | 36,9      | 42        |       |
|                              | Q1-Q3  | 21.1-40.5 | 19.3-64.7 |       |
| SOST (pmol/L) at 12 Months   | n      | 2         | 0         |       |
|                              | Median | 27,8      | .         |       |
|                              | Q1-Q3  | 20.0-35.7 | .-.       |       |
| Dkk1 (pmol/L)                |        |           |           |       |
| Dkk1 (pmol/L) at baseline    | n      | 11        | 13        | 0,685 |
|                              | Median | 46,8      | 38        |       |
|                              | Q1-Q3  | 18.4-72.8 | 31.4-50.9 |       |
| Dkk1 (pmol/L) at 2 Months    | n      | 9         | 8         | 0,597 |
|                              | Median | 42        | 34,1      |       |
|                              | Q1-Q3  | 24.4-58.4 | 27.8-74.2 |       |
| Dkk1 (pmol/L) at 4 Months    | n      | 6         | 5         | 0,784 |
|                              | Median | 40,1      | 27,8      |       |
|                              | Q1-Q3  | 18.5-57.5 | 22.8-62.9 |       |
| Dkk1 (pmol/L) at 6 Months    | n      | 5         | 4         | 0,391 |
|                              | Median | 39,7      | 33        |       |
|                              | Q1-Q3  | 37.0-49.2 | 20.9-43.2 |       |
| Dkk1 (pmol/L) at 8 Months    | n      | 5         | 3         | 0,551 |
|                              | Median | 28,2      | 34,4      |       |
|                              | Q1-Q3  | 23.8-29.7 | 5.9-51.3  |       |
| Dkk1 (pmol/L) at 10 Months   | n      | 5         | 2         | 0,333 |
|                              | Median | 16,3      | 29,8      |       |
|                              | Q1-Q3  | 9.1-26.1  | 28.7-31.0 |       |
| Dkk1 (pmol/L) at 12 Months   | n      | 2         | 0         |       |
|                              | Median | 14,4      | .         |       |

|                                |                          |             |             |        |
|--------------------------------|--------------------------|-------------|-------------|--------|
|                                | Q1-Q3                    | 8.4-20.4    | .-.         |        |
|                                | <b>activin-A (pg/ml)</b> |             |             |        |
| activin-A (pg/ml) at baseline  | n                        | 11          | 13          | 0,487  |
|                                | Median                   | 614,9       | 735,4       |        |
|                                | Q1-Q3                    | 505.0-770.8 | 492.3-913.5 |        |
| activin-A (pg/ml) at 2 Months  | n                        | 9           | 8           | 0,229  |
|                                | Median                   | 390,4       | 507,8       |        |
|                                | Q1-Q3                    | 321.0-488.4 | 449.6-595.1 |        |
| activin-A (pg/ml) at 4 Months  | n                        | 6           | 5           | 0,523  |
|                                | Median                   | 443,5       | 412,5       |        |
|                                | Q1-Q3                    | 355.4-580.9 | 334.5-492.5 |        |
| activin-A (pg/ml) at 6 Months  | n                        | 5           | 4           | 0,713  |
|                                | Median                   | 366,9       | 383,5       |        |
|                                | Q1-Q3                    | 300.0-593.8 | 375.7-446.4 |        |
| activin-A (pg/ml) at 8 Months  | n                        | 5           | 3           | >0.999 |
|                                | Median                   | 418,4       | 365,7       |        |
|                                | Q1-Q3                    | 319.0-439.0 | 231.9-537.9 |        |
| activin-A (pg/ml) at 10 Months | n                        | 5           | 2           | 0,846  |
|                                | Median                   | 362,8       | 320,7       |        |
|                                | Q1-Q3                    | 280.5-422.7 | 283.8-357.5 |        |
| activin-A (pg/ml) at 12 Months | n                        | 2           | 0           |        |
|                                | Median                   | 287,5       | .           |        |
|                                | Q1-Q3                    | 256.8-318.2 | .-.         |        |
|                                | <b>CCL3 (ng/ml)</b>      |             |             |        |
| CCL3 (ng/ml) at baseline       | n                        | 11          | 13          | 0,385  |
|                                | Median                   | 73,9        | 88,1        |        |
|                                | Q1-Q3                    | 62.2-81.3   | 22.8-98.9   |        |
| CCL3 (ng/ml) at 2 Months       | n                        | 9           | 8           | 0,885  |
|                                | Median                   | 70,5        | 71,9        |        |
|                                | Q1-Q3                    | 44.0-83.2   | 28.0-92.4   |        |
| CCL3 (ng/ml) at 4 Months       | n                        | 6           | 5           | 0,055  |
|                                | Median                   | 55,1        | 72          |        |
|                                | Q1-Q3                    | 34.3-68.0   | 68.0-82.9   |        |
| CCL3 (ng/ml) at 6 Months       | n                        | 5           | 4           | 0,066  |
|                                | Median                   | 61,2        | 72,1        |        |
|                                | Q1-Q3                    | 54.0-62.1   | 66.2-73.7   |        |
| CCL3 (ng/ml) at 8 Months       | n                        | 5           | 3           | 0,233  |
|                                | Median                   | 54,3        | 63,5        |        |
|                                | Q1-Q3                    | 21.1-61.1   | 55.1-88.9   |        |
| CCL3 (ng/ml) at 10 Months      | n                        | 5           | 2           | 0,846  |
|                                | Median                   | 14,2        | 53,3        |        |
|                                | Q1-Q3                    | 9.1-57.9    | 50.7-56.0   |        |
| CCL3 (ng/ml) at 12 Months      | n                        | 2           | 0           |        |
|                                | Median                   | 34,1        | .           |        |
|                                | Q1-Q3                    | 3.9-64.3    | .-.         |        |

<sup>a</sup> Mann-Whitney U test

Table S2. Biomarker values at each timepoint, by ECOG PS at Kd initiation.

|                                  |        | ECOG      |             |                      |
|----------------------------------|--------|-----------|-------------|----------------------|
|                                  |        | 0-1       | 2 or higher |                      |
|                                  |        | n (%)     | n (%)       | p-value <sup>a</sup> |
| bALP (µg/L)                      |        |           |             |                      |
| bALP (µg/L) at baseline          | n      | 20        | 4           | 0,810                |
|                                  | Median | 10,6      | 14,8        |                      |
|                                  | Q1-Q3  | 8.6-11.4  | 10.9-25.5   |                      |
| bALP (µg/L) at 2 Months          | n      | 16        | 1           | 0,475                |
|                                  | Median | 11,9      | 15,4        |                      |
|                                  | Q1-Q3  | 8.5-15.2  | 15.4-15.4   |                      |
| bALP (µg/L) at 4 Months          | n      | 11        | 0           |                      |
|                                  | Median | 11,6      | .           |                      |
|                                  | Q1-Q3  | 9.1-14.1  | .-.         |                      |
| bALP (µg/L) at 6 Months          | n      | 9         | 0           |                      |
|                                  | Median | 13,6      | .           |                      |
|                                  | Q1-Q3  | 8.1-14.8  | .-.         |                      |
| bALP (µg/L) at 8 Months          | n      | 8         | 0           |                      |
|                                  | Median | 16        | .           |                      |
|                                  | Q1-Q3  | 6.2-17.4  | .-.         |                      |
| bALP (µg/L) at 10 Months         | n      | 7         | 0           |                      |
|                                  | Median | 15        | .           |                      |
|                                  | Q1-Q3  | 7.0-18.1  | .-.         |                      |
| bALP (µg/L) at 12 Months         | n      | 2         | 0           |                      |
|                                  | Median | 17,1      | .           |                      |
|                                  | Q1-Q3  | 14.5-19.7 | .-.         |                      |
| Osteocalcin (ng/ml)              |        |           |             |                      |
| Osteocalcin (ng/ml) at baseline  | n      | 20        | 4           | <b>0,027</b>         |
|                                  | Median | 7,4       | 11,6        |                      |
|                                  | Q1-Q3  | 4.6-10.8  | 10.7-19.4   |                      |
| Osteocalcin (ng/ml) at 2 Months  | n      | 16        | 1           | 0,610                |
|                                  | Median | 10,7      | 9,4         |                      |
|                                  | Q1-Q3  | 7.3-14.5  | 9.4-9.4     |                      |
| Osteocalcin (ng/ml) at 4 Months  | n      | 11        | 0           |                      |
|                                  | Median | 12,4      | .           |                      |
|                                  | Q1-Q3  | 9.9-19.2  | .-.         |                      |
| Osteocalcin (ng/ml) at 6 Months  | n      | 9         | 0           |                      |
|                                  | Median | 13,9      | .           |                      |
|                                  | Q1-Q3  | 11.1-18.9 | .-.         |                      |
| Osteocalcin (ng/ml) at 8 Months  | n      | 8         | 0           |                      |
|                                  | Median | 15,9      | .           |                      |
|                                  | Q1-Q3  | 7.3-23.8  | .-.         |                      |
| Osteocalcin (ng/ml) at 10 Months | n      | 7         | 0           |                      |
|                                  | Median | 16,8      | .           |                      |
|                                  | Q1-Q3  | 3.8-19.7  | .-.         |                      |
| Osteocalcin (ng/ml) at 12 Months | n      | 2         | 0           |                      |
|                                  | Median | 17,1      | .           |                      |
|                                  | Q1-Q3  | 13.3-20.8 | .-.         |                      |
| PINP (pg/ml)                     |        |           |             |                      |
| PINP (pg/ml) at baseline         | n      | 20        | 4           | 0,131                |

|                            |                       |             |             |              |
|----------------------------|-----------------------|-------------|-------------|--------------|
|                            | Median                | 477,8       | 746,4       |              |
|                            | Q1-Q3                 | 272.6-693.6 | 639.5-766.1 |              |
| PINP (pg/ml) at 2 Months   | n                     | 16          | 1           | 0,126        |
|                            | Median                | 467,8       | 135,1       |              |
|                            | Q1-Q3                 | 227.9-777.4 | 135.1-135.1 |              |
| PINP (pg/ml) at 4 Months   | n                     | 11          | 0           |              |
|                            | Median                | 490,2       | .           |              |
|                            | Q1-Q3                 | 411.6-777.5 | .-.         |              |
| PINP (pg/ml) at 6 Months   | n                     | 9           | 0           |              |
|                            | Median                | 442,8       | .           |              |
|                            | Q1-Q3                 | 419.7-789.0 | .-.         |              |
| PINP (pg/ml) at 8 Months   | n                     | 8           | 0           |              |
|                            | Median                | 884,9       | .           |              |
|                            | Q1-Q3                 | 461.1-2072  | .-.         |              |
| PINP (pg/ml) at 10 Months  | n                     | 7           | 0           |              |
|                            | Median                | 652         | .           |              |
|                            | Q1-Q3                 | 447.6-2567  | .-.         |              |
| PINP (pg/ml) at 12 Months  | n                     | 2           | 0           |              |
|                            | Median                | 992,5       | .           |              |
|                            | Q1-Q3                 | 701.3-1284  | .-.         |              |
|                            | <b>CTX(ng/ml)</b>     |             |             |              |
| CTX(ng/ml) at baseline     | n                     | 20          | 4           | <b>0,018</b> |
|                            | Median                | 0,6         | 1,2         |              |
|                            | Q1-Q3                 | 0.2-0.9     | 1.0-1.6     |              |
| CTX(ng/ml) at 2 Months     | n                     | 16          | 1           | 0,261        |
|                            | Median                | 0,4         | 0,1         |              |
|                            | Q1-Q3                 | 0.2-0.6     | 0.1-0.1     |              |
| CTX(ng/ml) at 4 Months     | n                     | 11          | 0           |              |
|                            | Median                | 0,3         | .           |              |
|                            | Q1-Q3                 | 0.2-0.5     | .-.         |              |
| CTX(ng/ml) at 6 Months     | n                     | 9           | 0           |              |
|                            | Median                | 0,2         | .           |              |
|                            | Q1-Q3                 | 0.2-0.4     | .-.         |              |
| CTX(ng/ml) at 8 Months     | n                     | 8           | 0           |              |
|                            | Median                | 0,1         | .           |              |
|                            | Q1-Q3                 | 0.1-0.4     | .-.         |              |
| CTX(ng/ml) at 10 Months    | n                     | 7           | 0           |              |
|                            | Median                | 0,2         | .           |              |
|                            | Q1-Q3                 | 0.1-0.3     | .-.         |              |
| CTX(ng/ml) at 12 Months    | n                     | 2           | 0           |              |
|                            | Median                | 0,3         | .           |              |
|                            | Q1-Q3                 | 0.2-0.4     | .-.         |              |
|                            | <b>TRACP-5B (U/L)</b> |             |             |              |
| TRACP-5B (U/L) at baseline | n                     | 20          | 4           | <b>0,009</b> |
|                            | Median                | 2,4         | 5,6         |              |
|                            | Q1-Q3                 | 1.6-3.7     | 4.3-6.7     |              |
| TRACP-5B (U/L) at 2 Months | n                     | 16          | 1           | 0,185        |
|                            | Median                | 1,9         | 0,6         |              |
|                            | Q1-Q3                 | 1.4-2.1     | 0.6-0.6     |              |
| TRACP-5B (U/L) at 4 Months | n                     | 11          | 0           |              |

|                             |        |         |         |       |
|-----------------------------|--------|---------|---------|-------|
| TRACP-5B (U/L) at 6 Months  | Median | 1,2     | .       |       |
|                             | Q1-Q3  | 0.8-2.0 | .-.     |       |
|                             | n      | 9       | 0       |       |
| TRACP-5B (U/L) at 8 Months  | Median | 1,3     | .       |       |
|                             | Q1-Q3  | 1.1-1.9 | .-.     |       |
|                             | n      | 8       | 0       |       |
| TRACP-5B (U/L) at 10 Months | Median | 1       | .       |       |
|                             | Q1-Q3  | 0.9-1.1 | .-.     |       |
|                             | n      | 5       | 0       |       |
| TRACP-5B (U/L) at 12 Months | Median | 0,9     | .       |       |
|                             | Q1-Q3  | 0.9-0.9 | .-.     |       |
|                             | n      | 2       | 0       |       |
| <b>RANKL (pmol/L)</b>       |        |         |         |       |
| RANKL (pmol/L) at baseline  | n      | 20      | 4       | 0,296 |
|                             | Median | 0,2     | 0,4     | 0,262 |
|                             | Q1-Q3  | 0.1-0.4 | 0.3-0.5 |       |
| RANKL (pmol/L) at 2 Months  | n      | 16      | 1       |       |
|                             | Median | 0,2     | 0,1     |       |
|                             | Q1-Q3  | 0.1-0.2 | 0.1-0.1 |       |
| RANKL (pmol/L) at 4 Months  | n      | 11      | 0       |       |
|                             | Median | 0,1     | .       |       |
|                             | Q1-Q3  | 0.1-0.1 | .-.     |       |
| RANKL (pmol/L) at 6 Months  | n      | 9       | 0       |       |
|                             | Median | 0,1     | .       |       |
|                             | Q1-Q3  | 0.1-0.1 | .-.     |       |
| RANKL (pmol/L) at 8 Months  | n      | 8       | 0       |       |
|                             | Median | 0,1     | .       |       |
|                             | Q1-Q3  | 0.1-0.1 | .-.     |       |
| RANKL (pmol/L) at 10 Months | n      | 7       | 0       |       |
|                             | Median | 0,1     | .       |       |
|                             | Q1-Q3  | 0.0-0.2 | .-.     |       |
| RANKL (pmol/L) at 12 Months | n      | 2       | 0       |       |
|                             | Median | 0,1     | .       |       |
|                             | Q1-Q3  | 0.1-0.2 | .-.     |       |
| <b>RANKL/OPG ratio</b>      |        |         |         |       |
| RANKL/OPG ratio at baseline | n      | 20      | 4       | 0,261 |
|                             | Median | 0,1     | 0,1     | 0,475 |
|                             | Q1-Q3  | 0.0-0.1 | 0.1-0.1 |       |
| RANKL/OPG ratio at 2 Months | n      | 16      | 1       |       |
|                             | Median | 0       | 0       |       |
|                             | Q1-Q3  | 0.0-0.0 | 0.0-0.0 |       |
| RANKL/OPG ratio at 4 Months | n      | 11      | 0       |       |
|                             | Median | 0       | .       |       |
|                             | Q1-Q3  | 0.0-0.0 | .-.     |       |
| RANKL/OPG ratio at 6 Months | n      | 9       | 0       |       |
|                             | Median | 0       | .       |       |
|                             | Q1-Q3  | 0.0-0.0 | .-.     |       |
| RANKL/OPG ratio at 8 Months | n      | 8       | 0       |       |



|                              |        |           |           |       |
|------------------------------|--------|-----------|-----------|-------|
|                              | Median | 0         | .         |       |
|                              | Q1-Q3  | 0.0-0.0   | .-.       |       |
| RANKL/OPG ratio at 10 Months | n      | 7         | 0         |       |
|                              | Median | 0         | .         |       |
|                              | Q1-Q3  | 0.0-0.0   | .-.       |       |
| RANKL/OPG ratio at 12 Months | n      | 2         | 0         |       |
|                              | Median | 0         | .         |       |
|                              | Q1-Q3  | 0.0-0.0   | .-.       |       |
| <b>SOST (pmol/L)</b>         |        |           |           |       |
| SOST (pmol/L) at baseline    | n      | 20        | 4         | 0,462 |
|                              | Median | 43,1      | 60,2      |       |
|                              | Q1-Q3  | 37.8-66.0 | 49.0-64.4 |       |
| SOST (pmol/L) at 2 Months    | n      | 16        | 1         | 0,126 |
|                              | Median | 36,7      | 85,3      |       |
|                              | Q1-Q3  | 28.7-41.2 | 85.3-85.3 |       |
| SOST (pmol/L) at 4 Months    | n      | 11        | 0         |       |
|                              | Median | 33,2      | .         |       |
|                              | Q1-Q3  | 25.0-45.8 | .-.       |       |
| SOST (pmol/L) at 6 Months    | n      | 9         | 0         |       |
|                              | Median | 31,8      | .         |       |
|                              | Q1-Q3  | 25.5-63.1 | .-.       |       |
| SOST (pmol/L) at 8 Months    | n      | 8         | 0         |       |
|                              | Median | 28        | .         |       |
|                              | Q1-Q3  | 22.3-53.9 | .-.       |       |
| SOST (pmol/L) at 10 Months   | n      | 7         | 0         |       |
|                              | Median | 36,9      | .         |       |
|                              | Q1-Q3  | 20.2-64.7 | .-.       |       |
| SOST (pmol/L) at 12 Months   | n      | 2         | 0         |       |
|                              | Median | 27,8      | .         |       |
|                              | Q1-Q3  | 20.0-35.7 | .-.       |       |
| <b>Dkk1 (pmol/L)</b>         |        |           |           |       |
| Dkk1 (pmol/L) at baseline    | n      | 20        | 4         | 0,295 |
|                              | Median | 42,5      | 30,3      |       |
|                              | Q1-Q3  | 31.7-74.3 | 23.1-43.2 |       |
| Dkk1 (pmol/L) at 2 Months    | n      | 16        | 1         | 0,475 |
|                              | Median | 39,4      | 26,9      |       |
|                              | Q1-Q3  | 26.5-65.0 | 26.9-26.9 |       |
| Dkk1 (pmol/L) at 4 Months    | n      | 11        | 0         |       |
|                              | Median | 33,7      | .         |       |
|                              | Q1-Q3  | 18.5-58.4 | .-.       |       |
| Dkk1 (pmol/L) at 6 Months    | n      | 9         | 0         |       |
|                              | Median | 37        | .         |       |
|                              | Q1-Q3  | 32.0-49.2 | .-.       |       |
| Dkk1 (pmol/L) at 8 Months    | n      | 8         | 0         |       |
|                              | Median | 29        | .         |       |
|                              | Q1-Q3  | 21.5-32.7 | .-.       |       |
| Dkk1 (pmol/L) at 10 Months   | n      | 7         | 0         |       |
|                              | Median | 26,1      | .         |       |
|                              | Q1-Q3  | 9.1-31.0  | .-.       |       |
| Dkk1 (pmol/L) at 12 Months   | n      | 2         | 0         |       |

|                                |                          |             |             |              |
|--------------------------------|--------------------------|-------------|-------------|--------------|
|                                | Median                   | 14,4        | .           |              |
|                                | Q1-Q3                    | 8.4-20.4    | .-.         |              |
|                                | <b>activin-A (pg/ml)</b> |             |             |              |
| activin-A (pg/ml) at baseline  | n                        | 20          | 4           | 0,201        |
|                                | Median                   | 681,1       | 484,7       |              |
|                                | Q1-Q3                    | 514.9-908.1 | 330.1-726.3 |              |
| activin-A (pg/ml) at 2 Months  | n                        | 16          | 1           | 0,358        |
|                                | Median                   | 454,8       | 562,2       |              |
|                                | Q1-Q3                    | 339.6-528.0 | 562.2-562.2 |              |
| activin-A (pg/ml) at 4 Months  | n                        | 11          | 0           |              |
|                                | Median                   | 418,7       | .           |              |
|                                | Q1-Q3                    | 334.5-519.6 | .-.         |              |
| activin-A (pg/ml) at 6 Months  | n                        | 9           | 0           |              |
|                                | Median                   | 378,7       | .           |              |
|                                | Q1-Q3                    | 366.9-504.5 | .-.         |              |
| activin-A (pg/ml) at 8 Months  | n                        | 8           | 0           |              |
|                                | Median                   | 392         | .           |              |
|                                | Q1-Q3                    | 275.4-488.5 | .-.         |              |
| activin-A (pg/ml) at 10 Months | n                        | 7           | 0           |              |
|                                | Median                   | 357,5       | .           |              |
|                                | Q1-Q3                    | 280.5-422.7 | .-.         |              |
| activin-A (pg/ml) at 12 Months | n                        | 2           | 0           |              |
|                                | Median                   | 287,5       | .           |              |
|                                | Q1-Q3                    | 256.8-318.2 | .-.         |              |
|                                | <b>CCL3 (ng/ml)</b>      |             |             |              |
| CCL3 (ng/ml) at baseline       | n                        | 20          | 4           | <b>0,040</b> |
|                                | Median                   | 74,6        | 96,9        |              |
|                                | Q1-Q3                    | 42.1-85.2   | 83.5-107.3  |              |
| CCL3 (ng/ml) at 2 Months       | n                        | 16          | 1           | 0,610        |
|                                | Median                   | 70,8        | 45,7        |              |
|                                | Q1-Q3                    | 41.5-92.4   | 45.7-45.7   |              |
| CCL3 (ng/ml) at 4 Months       | n                        | 11          | 0           |              |
|                                | Median                   | 68          | .           |              |
|                                | Q1-Q3                    | 47.0-72.0   | .-.         |              |
| CCL3 (ng/ml) at 6 Months       | n                        | 9           | 0           |              |
|                                | Median                   | 62,1        | .           |              |
|                                | Q1-Q3                    | 61.2-71.1   | .-.         |              |
| CCL3 (ng/ml) at 8 Months       | n                        | 8           | 0           |              |
|                                | Median                   | 58,1        | .           |              |
|                                | Q1-Q3                    | 37.7-65.2   | .-.         |              |
| CCL3 (ng/ml) at 10 Months      | n                        | 7           | 0           |              |
|                                | Median                   | 50,7        | .           |              |
|                                | Q1-Q3                    | 9.1-57.9    | .-.         |              |
| CCL3 (ng/ml) at 12 Months      | n                        | 2           | 0           |              |
|                                | Median                   | 34,1        | .           |              |
|                                | Q1-Q3                    | 3.9-64.3    | .-.         |              |

<sup>a</sup> Mann-Whitney U test; <sup>b</sup> Kruskal-Wallis test

Table S3. Biomarker values at each timepoint, by ISS stage at diagnosis

|                                 |        | ISS at diagnosis |           |           |                      |
|---------------------------------|--------|------------------|-----------|-----------|----------------------|
|                                 |        | I                | II        | III       |                      |
|                                 |        | n (%)            | n (%)     | n (%)     | p-value <sup>a</sup> |
| bALP (µg/L)                     |        |                  |           |           |                      |
| bALP (µg/L) at baseline         | n      | 8                | 8         | 8         | 0,990                |
|                                 | Median | 11               | 10,8      | 10,8      |                      |
|                                 | Q1-Q3  | 8.6-12.9         | 9.7-11.5  | 9.3-11.6  |                      |
| bALP (µg/L) at 2 Months         | n      | 6                | 4         | 7         | 0,230                |
|                                 | Median | 9                | 11,2      | 12,8      |                      |
|                                 | Q1-Q3  | 7.6-12.1         | 8.6-16.2  | 11.7-17.5 |                      |
| bALP (µg/L) at 4 Months         | n      | 3                | 3         | 5         | 0,177                |
|                                 | Median | 9,1              | 11,9      | 12,9      |                      |
|                                 | Q1-Q3  | 7.7-11.3         | 10.8-14.1 | 11.6-14.4 |                      |
| bALP (µg/L) at 6 Months         | n      | 2                | 3         | 4         | 0,574                |
|                                 | Median | 10,9             | 14,8      | 10,4      |                      |
|                                 | Q1-Q3  | 8.1-13.6         | 11.6-14.8 | 6.9-16.7  |                      |
| bALP (µg/L) at 8 Months         | n      | 2                | 2         | 4         | 0,264                |
|                                 | Median | 9,4              | 18,3      | 11,9      |                      |
|                                 | Q1-Q3  | 3.8-15.0         | 16.9-19.6 | 6.2-17.4  |                      |
| bALP (µg/L) at 10 Months        | n      | 2                | 1         | 4         | 0,706                |
|                                 | Median | 11               | 15,8      | 13,9      |                      |
|                                 | Q1-Q3  | 7.0-15.0         | 15.8-15.8 | 7.8-19.0  |                      |
| bALP (µg/L) at 12 Months        | n      | 1                | 1         | 0         |                      |
|                                 | Median | 14,5             | 19,7      | .         |                      |
|                                 | Q1-Q3  | 14.5-14.5        | 19.7-19.7 | .-.       |                      |
| Osteocalcin (ng/ml)             |        |                  |           |           |                      |
| Osteocalcin (ng/ml) at baseline | n      | 8                | 8         | 8         | 0,724                |
|                                 | Median | 11               | 9,6       | 7,4       |                      |
|                                 | Q1-Q3  | 6.2-11.6         | 4.7-10.5  | 4.6-14.0  |                      |
| Osteocalcin (ng/ml) at 2 Months | n      | 6                | 4         | 7         | 0,482                |
|                                 | Median | 14,1             | 10,7      | 9,4       |                      |
|                                 | Q1-Q3  | 10.5-14.9        | 6.3-11.6  | 5.8-20.4  |                      |

|                                  |        |             |            |             |       |
|----------------------------------|--------|-------------|------------|-------------|-------|
| Osteocalcin (ng/ml) at 4 Months  | n      | 3           | 3          | 5           | 0,179 |
|                                  | Median | 8,6         | 19,2       | 12,3        |       |
|                                  | Q1-Q3  | 1.0-17.2    | 12.4-19.4  | 11.2-17.7   |       |
| Osteocalcin (ng/ml) at 6 Months  | n      | 2           | 3          | 4           | 0,398 |
|                                  | Median | 10,1        | 18,9       | 12,5        |       |
|                                  | Q1-Q3  | 4.0-16.2    | 12.8-26.7  | 10.9-19.7   |       |
| Osteocalcin (ng/ml) at 8 Months  | n      | 2           | 2          | 4           | 0,607 |
|                                  | Median | 11,9        | 27,5       | 12,7        |       |
|                                  | Q1-Q3  | 6.0-17.8    | 14.9-40.1  | 7.0-23.3    |       |
| Osteocalcin (ng/ml) at 10 Months | n      | 2           | 1          | 4           | 0,725 |
|                                  | Median | 10,2        | 16,8       | 14,3        |       |
|                                  | Q1-Q3  | 2.8-17.7    | 16.8-16.8  | 6.3-23.9    |       |
| Osteocalcin (ng/ml) at 12 Months | n      | 1           | 1          | 0           |       |
|                                  | Median | 20,8        | 13,3       | .           |       |
|                                  | Q1-Q3  | 20.8-20.8   | 13.3-13.3  | .-.         |       |
| PINP (pg/ml)                     |        |             |            |             |       |
| PINP (pg/ml) at baseline         | n      | 8           | 8          | 8           | 0,310 |
|                                  | Median | 415,2       | 578        | 422,4       |       |
|                                  | Q1-Q3  | 139.5-702.4 | 512.4-1005 | 272.6-757.3 |       |
| PINP (pg/ml) at 2 Months         | n      | 6           | 4          | 7           | 0,463 |
|                                  | Median | 467,8       | 743        | 229,5       |       |
|                                  | Q1-Q3  | 333.2-569.4 | 462.8-1072 | 139.5-1020  |       |
| PINP (pg/ml) at 4 Months         | n      | 3           | 3          | 5           | 0,314 |
|                                  | Median | 459,5       | 777,5      | 439,2       |       |
|                                  | Q1-Q3  | 235.2-514.2 | 490.2-1567 | 411.6-601.4 |       |
| PINP (pg/ml) at 6 Months         | n      | 2           | 3          | 4           | 0,705 |
|                                  | Median | 442,3       | 698,7      | 431,2       |       |
|                                  | Q1-Q3  | 95.6-789.0  | 439.3-1694 | 408.7-1249  |       |
| PINP (pg/ml) at 8 Months         | n      | 2           | 2          | 4           | 0,570 |
|                                  | Median | 601,7       | 1461       | 1265        |       |
|                                  | Q1-Q3  | 198.9-1004  | 765.5-2156 | 461.1-2747  |       |
| PINP (pg/ml) at 10 Months        | n      | 2           | 1          | 4           | 0,923 |
|                                  | Median | 854,4       | 652        | 1563        |       |

|                            |                |            |             |            |       |
|----------------------------|----------------|------------|-------------|------------|-------|
| PINP (pg/ml) at 12 Months  | Q1-Q3          | 447.6-1261 | 652.0-652.0 | 447.4-3109 |       |
|                            | n              | 1          | 1           | 0          |       |
|                            | Median         | 1284       | 701,3       | .          |       |
|                            | Q1-Q3          | 1284-1284  | 701.3-701.3 | .-.        |       |
|                            | CTX(ng/ml)     |            |             |            |       |
| CTX(ng/ml) at baseline     | n              | 8          | 8           | 8          | 0,746 |
|                            | Median         | 0,6        | 0,8         | 0,8        |       |
|                            | Q1-Q3          | 0.2-0.8    | 0.4-1.0     | 0.3-1.0    |       |
| CTX(ng/ml) at 2 Months     | n              | 6          | 4           | 7          | 0,770 |
|                            | Median         | 0,3        | 0,5         | 0,5        |       |
|                            | Q1-Q3          | 0.2-0.5    | 0.3-0.7     | 0.1-0.6    |       |
| CTX(ng/ml) at 4 Months     | n              | 3          | 3           | 5          | 0,712 |
|                            | Median         | 0,2        | 0,3         | 0,3        |       |
|                            | Q1-Q3          | 0.1-0.5    | 0.2-0.7     | 0.3-0.3    |       |
| CTX(ng/ml) at 6 Months     | n              | 2          | 3           | 4          | 0,574 |
|                            | Median         | 0,3        | 0,3         | 0,2        |       |
|                            | Q1-Q3          | 0.1-0.4    | 0.2-0.7     | 0.2-0.4    |       |
| CTX(ng/ml) at 8 Months     | n              | 2          | 2           | 4          | 0,673 |
|                            | Median         | 0,2        | 0,3         | 0,1        |       |
|                            | Q1-Q3          | 0.2-0.3    | 0.1-0.5     | 0.1-0.3    |       |
| CTX(ng/ml) at 10 Months    | n              | 2          | 1           | 4          | 0,158 |
|                            | Median         | 0,3        | 0,4         | 0,1        |       |
|                            | Q1-Q3          | 0.2-0.3    | 0.4-0.4     | 0.1-0.2    |       |
| CTX(ng/ml) at 12 Months    | n              | 1          | 1           | 0          |       |
|                            | Median         | 0,2        | 0,4         | .          |       |
|                            | Q1-Q3          | 0.2-0.2    | 0.4-0.4     | .-.        |       |
|                            | TRACP-5B (U/L) |            |             |            |       |
| TRACP-5B (U/L) at baseline | n              | 8          | 8           | 8          | 0,564 |
|                            | Median         | 2          | 3,4         | 3,6        |       |
|                            | Q1-Q3          | 1.4-3.8    | 1.9-4.5     | 2.0-3.9    |       |
| TRACP-5B (U/L) at 2 Months | n              | 6          | 4           | 7          | 0,207 |
|                            | Median         | 1,3        | 2,1         | 1,8        |       |
|                            | Q1-Q3          | 0.7-1.9    | 1.9-2.6     | 1.0-2.4    |       |

|                             |        |         |          |         |              |
|-----------------------------|--------|---------|----------|---------|--------------|
| TRACP-5B (U/L) at 4 Months  | n      | 3       | 3        | 5       | 0,157        |
|                             | Median | 0,8     | 2        | 1,2     |              |
|                             | Q1-Q3  | 0.5-1.9 | 1.3-2.2  | 1.0-1.2 |              |
| TRACP-5B (U/L) at 6 Months  | n      | 2       | 3        | 4       | <b>0,047</b> |
|                             | Median | 1,8     | 1,9      | 1       |              |
|                             | Q1-Q3  | 1.7-1.9 | 1.3-15.9 | 0.9-1.1 |              |
| TRACP-5B (U/L) at 8 Months  | n      | 2       | 2        | 4       | 0,125        |
|                             | Median | 0,8     | 1,6      | 1       |              |
|                             | Q1-Q3  | 0.6-0.9 | 1.0-2.2  | 0.9-1.0 |              |
| TRACP-5B (U/L) at 10 Months | n      | 1       | 1        | 3       | 0,344        |
|                             | Median | 0,9     | 2        | 0,9     |              |
|                             | Q1-Q3  | 0.9-0.9 | 2.0-2.0  | 0.8-0.9 |              |
| TRACP-5B (U/L) at 12 Months | n      | 1       | 1        | 0       |              |
|                             | Median | 0,9     | 1,8      | .       |              |
|                             | Q1-Q3  | 0.9-0.9 | 1.8-1.8  | .-.     |              |
| <b>RANKL (pmol/L)</b>       |        |         |          |         |              |
| RANKL (pmol/L) at baseline  | n      | 8       | 8        | 8       | 0,846        |
|                             | Median | 0,2     | 0,2      | 0,4     |              |
|                             | Q1-Q3  | 0.2-0.4 | 0.1-0.4  | 0.1-0.5 |              |
| RANKL (pmol/L) at 2 Months  | n      | 6       | 4        | 7       | 0,560        |
|                             | Median | 0,2     | 0,2      | 0,2     |              |
|                             | Q1-Q3  | 0.1-0.2 | 0.1-0.3  | 0.1-0.2 |              |
| RANKL (pmol/L) at 4 Months  | n      | 3       | 3        | 5       | 0,132        |
|                             | Median | 0,1     | 0,1      | 0,1     |              |
|                             | Q1-Q3  | 0.1-0.2 | 0.1-0.2  | 0.1-0.1 |              |
| RANKL (pmol/L) at 6 Months  | n      | 2       | 3        | 4       | 0,398        |
|                             | Median | 0,1     | 0,1      | 0,1     |              |
|                             | Q1-Q3  | 0.1-0.1 | 0.1-0.2  | 0.1-0.1 |              |
| RANKL (pmol/L) at 8 Months  | n      | 2       | 2        | 4       | 0,293        |
|                             | Median | 0,1     | 0,1      | 0,1     |              |
|                             | Q1-Q3  | 0.1-0.1 | 0.1-0.2  | 0.0-0.1 |              |
| RANKL (pmol/L) at 10 Months | n      | 2       | 1        | 4       | 0,235        |
|                             | Median | 0,1     | 0,3      | 0       |              |

|                              |        |           |           |           |       |
|------------------------------|--------|-----------|-----------|-----------|-------|
| RANKL (pmol/L) at 12 Months  | Q1-Q3  | 0.1-0.1   | 0.3-0.3   | 0.0-0.1   |       |
|                              | n      | 1         | 1         | 0         |       |
|                              | Median | 0,1       | 0,2       | .         |       |
|                              | Q1-Q3  | 0.1-0.1   | 0.2-0.2   | .-.       |       |
| RANKL/OPG ratio              |        |           |           |           |       |
| RANKL/OPG ratio at baseline  | n      | 8         | 8         | 8         | 0,907 |
|                              | Median | 0,1       | 0,1       | 0,1       |       |
|                              | Q1-Q3  | 0.0-0.1   | 0.0-0.1   | 0.0-0.1   |       |
| RANKL/OPG ratio at 2 Months  | n      | 6         | 4         | 7         | 0,318 |
|                              | Median | 0         | 0         | 0         |       |
|                              | Q1-Q3  | 0.0-0.0   | 0.0-0.1   | 0.0-0.0   |       |
| RANKL/OPG ratio at 4 Months  | n      | 3         | 3         | 5         | 0,132 |
|                              | Median | 0         | 0         | 0         |       |
|                              | Q1-Q3  | 0.0-0.0   | 0.0-0.0   | 0.0-0.0   |       |
| RANKL/OPG ratio at 6 Months  | n      | 2         | 3         | 4         | 0,705 |
|                              | Median | 0         | 0         | 0         |       |
|                              | Q1-Q3  | 0.0-0.0   | 0.0-0.0   | 0.0-0.0   |       |
| RANKL/OPG ratio at 8 Months  | n      | 2         | 2         | 4         | 0,346 |
|                              | Median | 0         | 0         | 0         |       |
|                              | Q1-Q3  | 0.0-0.0   | 0.0-0.0   | 0.0-0.0   |       |
| RANKL/OPG ratio at 10 Months | n      | 2         | 1         | 4         | 0,325 |
|                              | Median | 0         | 0,1       | 0         |       |
|                              | Q1-Q3  | 0.0-0.0   | 0.1-0.1   | 0.0-0.0   |       |
| RANKL/OPG ratio at 12 Months | n      | 1         | 1         | 0         |       |
|                              | Median | 0         | 0         | .         |       |
|                              | Q1-Q3  | 0.0-0.0   | 0.0-0.0   | .-.       |       |
| SOST (pmol/L)                |        |           |           |           |       |
| SOST (pmol/L) at baseline    | n      | 8         | 8         | 8         | 0,512 |
|                              | Median | 58,7      | 46        | 39,8      |       |
|                              | Q1-Q3  | 43.1-68.1 | 37.8-65.2 | 35.6-63.7 |       |
| SOST (pmol/L) at 2 Months    | n      | 6         | 4         | 7         | 0,590 |
|                              | Median | 37,7      | 34,9      | 40,7      |       |
|                              | Q1-Q3  | 34.0-48.3 | 27.6-38.1 | 27.9-49.7 |       |

|                            |        |           |           |            |        |
|----------------------------|--------|-----------|-----------|------------|--------|
| SOST (pmol/L) at 4 Months  | n      | 3         | 3         | 5          | 0,167  |
|                            | Median | 36,7      | 45,8      | 25         |        |
|                            | Q1-Q3  | 33.2-43.3 | 32.8-98.7 | 22.8-29.7  |        |
| SOST (pmol/L) at 6 Months  | n      | 2         | 3         | 4          | 0,667  |
|                            | Median | 27,4      | 48,1      | 59,2       |        |
|                            | Q1-Q3  | 22.9-31.8 | 25.8-63.1 | 23.5-121.3 |        |
| SOST (pmol/L) at 8 Months  | n      | 2         | 2         | 4          | >0.999 |
|                            | Median | 33,9      | 28        | 42,3       |        |
|                            | Q1-Q3  | 23.5-44.3 | 26.2-29.9 | 20.8-88.3  |        |
| SOST (pmol/L) at 10 Months | n      | 2         | 1         | 4          | 0,923  |
|                            | Median | 42,9      | 36,9      | 30,4       |        |
|                            | Q1-Q3  | 21.1-64.7 | 36.9-36.9 | 19.8-61.3  |        |
| SOST (pmol/L) at 12 Months | n      | 1         | 1         | 0          |        |
|                            | Median | 20        | 35,7      | .          |        |
|                            | Q1-Q3  | 20.0-20.0 | 35.7-35.7 | .-.        |        |
| Dkk1 (pmol/L)              |        |           |           |            |        |
| Dkk1 (pmol/L) at baseline  | n      | 8         | 8         | 8          | 0,175  |
|                            | Median | 36,5      | 35        | 52,8       |        |
|                            | Q1-Q3  | 23.8-46.8 | 23.1-59.8 | 42.5-78.3  |        |
| Dkk1 (pmol/L) at 2 Months  | n      | 6         | 4         | 7          | 0,243  |
|                            | Median | 26,7      | 32,8      | 58,4       |        |
|                            | Q1-Q3  | 24.1-62.5 | 19.7-46.1 | 31.4-72.2  |        |
| Dkk1 (pmol/L) at 4 Months  | n      | 3         | 3         | 5          | 0,761  |
|                            | Median | 58,4      | 27,8      | 33,7       |        |
|                            | Q1-Q3  | 14.6-63.3 | 15.9-57.5 | 22.8-46.5  |        |
| Dkk1 (pmol/L) at 6 Months  | n      | 2         | 3         | 4          | 0,962  |
|                            | Median | 36,8      | 34        | 38,3       |        |
|                            | Q1-Q3  | 21.2-52.4 | 9.7-54.8  | 34.5-44.4  |        |
| Dkk1 (pmol/L) at 8 Months  | n      | 2         | 2         | 4          | 0,408  |
|                            | Median | 35,2      | 17,1      | 30,4       |        |
|                            | Q1-Q3  | 19.2-51.3 | 5.9-28.2  | 26.8-32.7  |        |
| Dkk1 (pmol/L) at 10 Months | n      | 2         | 1         | 4          | 0,923  |
|                            | Median | 18,9      | 26,1      | 23,6       |        |



|                                |              |             |             |             |       |
|--------------------------------|--------------|-------------|-------------|-------------|-------|
| Dkk1 (pmol/L) at 12 Months     | Q1-Q3        | 9.1-28.7    | 26.1-26.1   | 12.3-34.9   |       |
|                                | n            | 1           | 1           | 0           |       |
|                                | Median       | 8,4         | 20,4        | .           |       |
|                                | Q1-Q3        | 8.4-8.4     | 20.4-20.4   | .-.         |       |
| activin-A (pg/ml)              |              |             |             |             |       |
| activin-A (pg/ml) at baseline  | n            | 8           | 8           | 8           | 0,595 |
|                                | Median       | 581,6       | 798,5       | 644,7       |       |
|                                | Q1-Q3        | 389.2-703.4 | 553.9-908.9 | 514.9-833.2 |       |
| activin-A (pg/ml) at 2 Months  | n            | 6           | 4           | 7           | 0,041 |
|                                | Median       | 462,4       | 300,5       | 562,2       |       |
|                                | Q1-Q3        | 436.9-488.4 | 231.1-391.6 | 390.4-786.7 |       |
| activin-A (pg/ml) at 4 Months  | n            | 3           | 3           | 5           | 0,976 |
|                                | Median       | 412,5       | 418,7       | 468,3       |       |
|                                | Q1-Q3        | 355.4-580.9 | 334.5-519.6 | 223.6-492.5 |       |
| activin-A (pg/ml) at 6 Months  | n            | 2           | 3           | 4           | 0,432 |
|                                | Median       | 344,2       | 504,5       | 372,8       |       |
|                                | Q1-Q3        | 300.0-388.3 | 372.6-695.8 | 290.9-486.3 |       |
| activin-A (pg/ml) at 8 Months  | n            | 2           | 2           | 4           | 0,264 |
|                                | Median       | 289,6       | 488,5       | 368,7       |       |
|                                | Q1-Q3        | 213.5-365.7 | 439.0-537.9 | 275.4-700.5 |       |
| activin-A (pg/ml) at 10 Months | n            | 2           | 1           | 4           | 0,601 |
|                                | Median       | 360,2       | 280,5       | 353,2       |       |
|                                | Q1-Q3        | 357.5-362.8 | 280.5-280.5 | 242.4-445.1 |       |
| activin-A (pg/ml) at 12 Months | n            | 1           | 1           | 0           |       |
|                                | Median       | 256,8       | 318,2       | .           |       |
|                                | Q1-Q3        | 256.8-256.8 | 318.2-318.2 | .-.         |       |
|                                | CCL3 (ng/ml) |             |             |             |       |
| CCL3 (ng/ml) at baseline       | n            | 8           | 8           | 8           | 0,388 |
|                                | Median       | 79,2        | 80,1        | 72,4        |       |
|                                | Q1-Q3        | 42.1-101.3  | 73.9-96.8   | 36.2-84.2   |       |
| CCL3 (ng/ml) at 2 Months       | n            | 6           | 4           | 7           | 0,849 |
|                                | Median       | 76,8        | 55,7        | 71,2        |       |
|                                | Q1-Q3        | 39.0-95.5   | 27.2-85.1   | 45.7-89.4   |       |

|                           |        |           |            |           |       |
|---------------------------|--------|-----------|------------|-----------|-------|
| CCL3 (ng/ml) at 4 Months  | n      | 3         | 3          | 5         | 0,886 |
|                           | Median | 63,3      | 68         | 68        |       |
|                           | Q1-Q3  | 32.8-82.9 | 34.3-138.2 | 61.3-69.6 |       |
| CCL3 (ng/ml) at 6 Months  | n      | 2         | 3          | 4         | 0,678 |
|                           | Median | 69,3      | 61,3       | 61,7      |       |
|                           | Q1-Q3  | 67.4-71.1 | 6.3-74.3   | 57.6-67.6 |       |
| CCL3 (ng/ml) at 8 Months  | n      | 2         | 2          | 4         | 0,368 |
|                           | Median | 58,9      | 31,9       | 64        |       |
|                           | Q1-Q3  | 54.3-63.5 | 8.7-55.1   | 41.1-77.9 |       |
| CCL3 (ng/ml) at 10 Months | n      | 2         | 1          | 4         | 0,248 |
|                           | Median | 58,4      | 9,1        | 32,4      |       |
|                           | Q1-Q3  | 56.0-60.8 | 9.1-9.1    | 8.8-54.3  |       |
| CCL3 (ng/ml) at 12 Months | n      | 1         | 1          | 0         |       |
|                           | Median | 64,3      | 3,9        | .         |       |
|                           | Q1-Q3  | 64.3-64.3 | 3.9-3.9    | .-.       |       |

---

<sup>a</sup> Kruskal-Walli test

Table S4. Biomarker values at each timepoint, by R-ISS stage at diagnosis

|                                 |        | R-ISS at diagnosis  |           |           | p-value <sup>a</sup> |
|---------------------------------|--------|---------------------|-----------|-----------|----------------------|
|                                 |        | I                   | II        | III       |                      |
|                                 |        | n (%)               | n (%)     | n (%)     |                      |
|                                 |        | bALP (µg/L)         |           |           |                      |
| bALP (µg/L) at baseline         | n      | 7                   | 11        | 6         | 0,790                |
|                                 | Median | 11,3                | 11,1      | 10,4      |                      |
|                                 | Q1-Q3  | 8.9-14.0            | 9.3-11.7  | 8.3-11.5  |                      |
| bALP (µg/L) at 2 Months         | n      | 5                   | 7         | 5         | 0,305                |
|                                 | Median | 8                   | 12,9      | 12,4      |                      |
|                                 | Q1-Q3  | 7.6-12.1            | 9.4-19.5  | 11.7-12.8 |                      |
| bALP (µg/L) at 4 Months         | n      | 3                   | 5         | 3         | 0,157                |
|                                 | Median | 9,1                 | 11,9      | 12,9      |                      |
|                                 | Q1-Q3  | 7.7-11.3            | 10.8-14.1 | 11.6-14.4 |                      |
| bALP (µg/L) at 6 Months         | n      | 2                   | 5         | 2         | 0,337                |
|                                 | Median | 10,9                | 11,6      | 16,7      |                      |
|                                 | Q1-Q3  | 8.1-13.6            | 7.1-14.8  | 13.7-19.7 |                      |
| bALP (µg/L) at 8 Months         | n      | 2                   | 4         | 2         | 0,264                |
|                                 | Median | 9,4                 | 11,9      | 17,4      |                      |
|                                 | Q1-Q3  | 3.8-15.0            | 6.2-18.3  | 16.9-18.0 |                      |
| bALP (µg/L) at 10 Months        | n      | 2                   | 3         | 2         | 0,153                |
|                                 | Median | 11                  | 9,8       | 19        |                      |
|                                 | Q1-Q3  | 7.0-15.0            | 5.9-15.8  | 18.1-20.0 |                      |
| bALP (µg/L) at 12 Months        | n      | 1                   | 1         | 0         |                      |
|                                 | Median | 14,5                | 19,7      | .         |                      |
|                                 | Q1-Q3  | 14.5-14.5           | 19.7-19.7 | .-.       |                      |
|                                 |        | Osteocalcin (ng/ml) |           |           |                      |
| Osteocalcin (ng/ml) at baseline | n      | 7                   | 11        | 6         | 0,652                |
|                                 | Median | 10,8                | 9,2       | 8,3       |                      |
|                                 | Q1-Q3  | 5.8-11.4            | 2.9-10.8  | 7.4-18.9  |                      |
| Osteocalcin (ng/ml) at 2 Months | n      | 5                   | 7         | 5         | 0,668                |
|                                 | Median | 14,1                | 10,9      | 9,4       |                      |
|                                 | Q1-Q3  | 10.5-14.9           | 2.0-14.1  | 8.8-9.4   |                      |

|                                  |        |             |             |             |       |
|----------------------------------|--------|-------------|-------------|-------------|-------|
| Osteocalcin (ng/ml) at 4 Months  | n      | 3           | 5           | 3           | 0,257 |
|                                  | Median | 8,6         | 17,7        | 12,3        |       |
|                                  | Q1-Q3  | 1.0-17.2    | 12.4-19.2   | 11.2-19.7   |       |
| Osteocalcin (ng/ml) at 6 Months  | n      | 2           | 5           | 2           | 0,549 |
|                                  | Median | 10,1        | 12,8        | 19,7        |       |
|                                  | Q1-Q3  | 4.0-16.2    | 11.1-18.9   | 13.9-25.4   |       |
| Osteocalcin (ng/ml) at 8 Months  | n      | 2           | 4           | 2           | 0,607 |
|                                  | Median | 11,9        | 11,7        | 23,3        |       |
|                                  | Q1-Q3  | 6.0-17.8    | 7.0-27.5    | 16.9-29.8   |       |
| Osteocalcin (ng/ml) at 10 Months | n      | 2           | 3           | 2           | 0,153 |
|                                  | Median | 10,2        | 8,9         | 23,9        |       |
|                                  | Q1-Q3  | 2.8-17.7    | 3.8-16.8    | 19.7-28.2   |       |
| Osteocalcin (ng/ml) at 12 Months | n      | 1           | 1           | 0           |       |
|                                  | Median | 20,8        | 13,3        | .           |       |
|                                  | Q1-Q3  | 20.8-20.8   | 13.3-13.3   | .-.         |       |
| PINP (pg/ml)                     |        |             |             |             |       |
| PINP (pg/ml) at baseline         | n      | 7           | 11          | 6           | 0,298 |
|                                  | Median | 362,7       | 572,8       | 419,7       |       |
|                                  | Q1-Q3  | 115.5-750.7 | 467.8-1268  | 253.1-733.1 |       |
| PINP (pg/ml) at 2 Months         | n      | 5           | 7           | 5           | 0,992 |
|                                  | Median | 384,9       | 550,8       | 384,2       |       |
|                                  | Q1-Q3  | 333.2-569.4 | 214.8-775.3 | 229.5-1020  |       |
| PINP (pg/ml) at 4 Months         | n      | 3           | 5           | 3           | 0,469 |
|                                  | Median | 459,5       | 490,2       | 601,4       |       |
|                                  | Q1-Q3  | 235.2-514.2 | 411.6-777.5 | 439.2-1897  |       |
| PINP (pg/ml) at 6 Months         | n      | 2           | 5           | 2           | 0,766 |
|                                  | Median | 442,3       | 442,8       | 1238        |       |
|                                  | Q1-Q3  | 95.6-789.0  | 439.3-698.7 | 419.7-2056  |       |
| PINP (pg/ml) at 8 Months         | n      | 2           | 4           | 2           | 0,570 |
|                                  | Median | 601,7       | 1461        | 1265        |       |
|                                  | Q1-Q3  | 198.9-1004  | 573.3-2831  | 541.1-1988  |       |
| PINP (pg/ml) at 10 Months        | n      | 2           | 3           | 2           | 0,898 |
|                                  | Median | 854,4       | 652         | 1563        |       |

|                            |        |            |             |            |       |
|----------------------------|--------|------------|-------------|------------|-------|
| PINP (pg/ml) at 12 Months  | Q1-Q3  | 447.6-1261 | 335.8-3650  | 559.0-2567 |       |
|                            | n      | 1          | 1           | 0          |       |
|                            | Median | 1284       | 701,3       | .          |       |
|                            | Q1-Q3  | 1284-1284  | 701.3-701.3 | .-.        |       |
| <b>CTX(ng/ml)</b>          |        |            |             |            |       |
| CTX(ng/ml) at baseline     | n      | 7          | 11          | 6          | 0,294 |
|                            | Median | 0,6        | 0,8         | 0,9        |       |
|                            | Q1-Q3  | 0.2-0.8    | 0.2-0.9     | 0.7-1.0    |       |
| CTX(ng/ml) at 2 Months     | n      | 5          | 7           | 5          | 0,379 |
|                            | Median | 0,3        | 0,4         | 0,6        |       |
|                            | Q1-Q3  | 0.2-0.3    | 0.1-0.7     | 0.5-0.6    |       |
| CTX(ng/ml) at 4 Months     | n      | 3          | 5           | 3          | 0,344 |
|                            | Median | 0,2        | 0,3         | 0,3        |       |
|                            | Q1-Q3  | 0.1-0.5    | 0.2-0.3     | 0.3-0.7    |       |
| CTX(ng/ml) at 6 Months     | n      | 2          | 5           | 2          | 0,835 |
|                            | Median | 0,3        | 0,2         | 0,4        |       |
|                            | Q1-Q3  | 0.1-0.4    | 0.2-0.3     | 0.2-0.6    |       |
| CTX(ng/ml) at 8 Months     | n      | 2          | 4           | 2          | 0,346 |
|                            | Median | 0,2        | 0,1         | 0,3        |       |
|                            | Q1-Q3  | 0.2-0.3    | 0.1-0.3     | 0.1-0.5    |       |
| CTX(ng/ml) at 10 Months    | n      | 2          | 3           | 2          | 0,700 |
|                            | Median | 0,3        | 0,1         | 0,2        |       |
|                            | Q1-Q3  | 0.2-0.3    | 0.1-0.4     | 0.1-0.2    |       |
| CTX(ng/ml) at 12 Months    | n      | 1          | 1           | 0          |       |
|                            | Median | 0,2        | 0,4         | .          |       |
|                            | Q1-Q3  | 0.2-0.2    | 0.4-0.4     | .-.        |       |
| <b>TRACP-5B (U/L)</b>      |        |            |             |            |       |
| TRACP-5B (U/L) at baseline | n      | 7          | 11          | 6          | 0,317 |
|                            | Median | 1,8        | 3,3         | 3,7        |       |
|                            | Q1-Q3  | 1.1-3.6    | 1.9-4.3     | 3.5-4.0    |       |
| TRACP-5B (U/L) at 2 Months | n      | 5          | 7           | 5          | 0,285 |
|                            | Median | 0,8        | 1,9         | 1,9        |       |
|                            | Q1-Q3  | 0.7-1.9    | 1.7-2.1     | 1.7-2.4    |       |

|                             |        |         |         |         |       |
|-----------------------------|--------|---------|---------|---------|-------|
| TRACP-5B (U/L) at 4 Months  | n      | 3       | 5       | 3       | 0,466 |
|                             | Median | 0,8     | 1,3     | 1,2     |       |
|                             | Q1-Q3  | 0.5-1.9 | 1.0-2.0 | 1.2-2.1 |       |
| TRACP-5B (U/L) at 6 Months  | n      | 2       | 5       | 2       | 0,429 |
|                             | Median | 1,8     | 1,3     | 1,1     |       |
|                             | Q1-Q3  | 1.7-1.9 | 1.1-1.9 | 1.0-1.2 |       |
| TRACP-5B (U/L) at 8 Months  | n      | 2       | 4       | 2       | 0,210 |
|                             | Median | 0,8     | 1,1     | 1       |       |
|                             | Q1-Q3  | 0.6-0.9 | 0.9-1.6 | 1.0-1.0 |       |
| TRACP-5B (U/L) at 10 Months | n      | 1       | 2       | 2       | 0,741 |
|                             | Median | 0,9     | 1,4     | 0,9     |       |
|                             | Q1-Q3  | 0.9-0.9 | 0.8-2.0 | 0.9-0.9 |       |
| TRACP-5B (U/L) at 12 Months | n      | 1       | 1       | 0       |       |
|                             | Median | 0,9     | 1,8     | .       |       |
|                             | Q1-Q3  | 0.9-0.9 | 1.8-1.8 | .-.     |       |
| RANKL (pmol/L)              |        |         |         |         |       |
| RANKL (pmol/L) at baseline  | n      | 7       | 11      | 6       | 0,221 |
|                             | Median | 0,2     | 0,2     | 0,4     |       |
|                             | Q1-Q3  | 0.2-0.3 | 0.1-0.4 | 0.3-0.5 |       |
| RANKL (pmol/L) at 2 Months  | n      | 5       | 7       | 5       | 0,679 |
|                             | Median | 0,2     | 0,2     | 0,2     |       |
|                             | Q1-Q3  | 0.1-0.2 | 0.1-0.2 | 0.2-0.2 |       |
| RANKL (pmol/L) at 4 Months  | n      | 3       | 5       | 3       | 0,120 |
|                             | Median | 0,1     | 0,1     | 0,1     |       |
|                             | Q1-Q3  | 0.1-0.2 | 0.1-0.1 | 0.1-0.1 |       |
| RANKL (pmol/L) at 6 Months  | n      | 2       | 5       | 2       | 0,076 |
|                             | Median | 0,1     | 0,1     | 0,1     |       |
|                             | Q1-Q3  | 0.1-0.1 | 0.1-0.2 | 0.1-0.1 |       |
| RANKL (pmol/L) at 8 Months  | n      | 2       | 4       | 2       | 0,127 |
|                             | Median | 0,1     | 0,1     | 0       |       |
|                             | Q1-Q3  | 0.1-0.1 | 0.1-0.2 | 0.0-0.0 |       |
| RANKL (pmol/L) at 10 Months | n      | 2       | 3       | 2       | 0,140 |
|                             | Median | 0,1     | 0,2     | 0       |       |

|                              |        |           |           |           |       |
|------------------------------|--------|-----------|-----------|-----------|-------|
| RANKL (pmol/L) at 12 Months  | Q1-Q3  | 0.1-0.1   | 0.1-0.3   | 0.0-0.0   |       |
|                              | n      | 1         | 1         | 0         |       |
|                              | Median | 0,1       | 0,2       | .         |       |
|                              | Q1-Q3  | 0.1-0.1   | 0.2-0.2   | .-.       |       |
| <b>RANKL/OPG ratio</b>       |        |           |           |           |       |
| RANKL/OPG ratio at baseline  | n      | 7         | 11        | 6         | 0,223 |
|                              | Median | 0,1       | 0,1       | 0,1       |       |
|                              | Q1-Q3  | 0.0-0.1   | 0.0-0.1   | 0.1-0.1   |       |
| RANKL/OPG ratio at 2 Months  | n      | 5         | 7         | 5         | 0,676 |
|                              | Median | 0         | 0         | 0         |       |
|                              | Q1-Q3  | 0.0-0.0   | 0.0-0.1   | 0.0-0.0   |       |
| RANKL/OPG ratio at 4 Months  | n      | 3         | 5         | 3         | 0,074 |
|                              | Median | 0         | 0         | 0         |       |
|                              | Q1-Q3  | 0.0-0.0   | 0.0-0.0   | 0.0-0.0   |       |
| RANKL/OPG ratio at 6 Months  | n      | 2         | 5         | 2         | 0,102 |
|                              | Median | 0         | 0         | 0         |       |
|                              | Q1-Q3  | 0.0-0.0   | 0.0-0.0   | 0.0-0.0   |       |
| RANKL/OPG ratio at 8 Months  | n      | 2         | 4         | 2         | 0,135 |
|                              | Median | 0         | 0         | 0         |       |
|                              | Q1-Q3  | 0.0-0.0   | 0.0-0.0   | 0.0-0.0   |       |
| RANKL/OPG ratio at 10 Months | n      | 2         | 3         | 2         | 0,069 |
|                              | Median | 0         | 0         | 0         |       |
|                              | Q1-Q3  | 0.0-0.0   | 0.0-0.1   | 0.0-0.0   |       |
| RANKL/OPG ratio at 12 Months | n      | 1         | 1         | 0         |       |
|                              | Median | 0         | 0         | .         |       |
|                              | Q1-Q3  | 0.0-0.0   | 0.0-0.0   | .-.       |       |
| <b>SOST (pmol/L)</b>         |        |           |           |           |       |
| SOST (pmol/L) at baseline    | n      | 7         | 11        | 6         | 0,384 |
|                              | Median | 56,2      | 50,3      | 39,8      |       |
|                              | Q1-Q3  | 41.4-70.6 | 37.9-66.3 | 33.2-62.9 |       |
| SOST (pmol/L) at 2 Months    | n      | 5         | 7         | 5         | 0,886 |
|                              | Median | 37,2      | 40,1      | 29,4      |       |
|                              | Q1-Q3  | 34.0-38.2 | 33.8-48.3 | 27.9-41.7 |       |

|                            |        |           |           |           |              |
|----------------------------|--------|-----------|-----------|-----------|--------------|
| SOST (pmol/L) at 4 Months  | n      | 3         | 5         | 3         | <b>0,047</b> |
|                            | Median | 36,7      | 45,8      | 22,8      |              |
|                            | Q1-Q3  | 33.2-43.3 | 32.8-77.1 | 22.3-25.0 |              |
| SOST (pmol/L) at 6 Months  | n      | 2         | 5         | 2         | 0,076        |
|                            | Median | 27,4      | 63,1      | 23,5      |              |
|                            | Q1-Q3  | 22.9-31.8 | 48.1-92.9 | 21.6-25.5 |              |
| SOST (pmol/L) at 8 Months  | n      | 2         | 4         | 2         | 0,105        |
|                            | Median | 33,9      | 46,7      | 20,8      |              |
|                            | Q1-Q3  | 23.5-44.3 | 28.0-88.3 | 20.4-21.2 |              |
| SOST (pmol/L) at 10 Months | n      | 2         | 3         | 2         | 0,140        |
|                            | Median | 42,9      | 40,5      | 19,8      |              |
|                            | Q1-Q3  | 21.1-64.7 | 36.9-82.1 | 19.3-20.2 |              |
| SOST (pmol/L) at 12 Months | n      | 1         | 1         | 0         |              |
|                            | Median | 20        | 35,7      | .         |              |
|                            | Q1-Q3  | 20.0-20.0 | 35.7-35.7 | .-.       |              |
| <b>Dkk1 (pmol/L)</b>       |        |           |           |           |              |
| Dkk1 (pmol/L) at baseline  | n      | 7         | 11        | 6         | 0,657        |
|                            | Median | 37,5      | 38        | 47        |              |
|                            | Q1-Q3  | 16.3-52.4 | 25.1-76.6 | 42.0-54.7 |              |
| Dkk1 (pmol/L) at 2 Months  | n      | 5         | 7         | 5         | 0,606        |
|                            | Median | 29,1      | 36,9      | 42        |              |
|                            | Q1-Q3  | 24.4-62.5 | 22.7-58.4 | 31.4-72.2 |              |
| Dkk1 (pmol/L) at 4 Months  | n      | 3         | 5         | 3         | 0,549        |
|                            | Median | 58,4      | 27,8      | 46,5      |              |
|                            | Q1-Q3  | 14.6-63.3 | 18.5-33.7 | 22.8-62.9 |              |
| Dkk1 (pmol/L) at 6 Months  | n      | 2         | 5         | 2         | 1,000        |
|                            | Median | 36,8      | 37        | 40,6      |              |
|                            | Q1-Q3  | 21.2-52.4 | 34.0-39.7 | 32.0-49.2 |              |
| Dkk1 (pmol/L) at 8 Months  | n      | 2         | 4         | 2         | 0,472        |
|                            | Median | 35,2      | 26        | 32,1      |              |
|                            | Q1-Q3  | 19.2-51.3 | 14.9-29.6 | 29.7-34.4 |              |
| Dkk1 (pmol/L) at 10 Months | n      | 2         | 3         | 2         | 0,140        |
|                            | Median | 18,9      | 16,3      | 34,9      |              |



|                                |              |             |             |             |       |
|--------------------------------|--------------|-------------|-------------|-------------|-------|
| Dkk1 (pmol/L) at 12 Months     | Q1-Q3        | 9.1-28.7    | 8.4-26.1    | 31.0-38.7   |       |
|                                | n            | 1           | 1           | 0           |       |
|                                | Median       | 8,4         | 20,4        | .           |       |
|                                | Q1-Q3        | 8.4-8.4     | 20.4-20.4   | .-.         |       |
| activin-A (pg/ml)              |              |             |             |             |       |
| activin-A (pg/ml) at baseline  | n            | 7           | 11          | 6           | 0,553 |
|                                | Median       | 548,3       | 694,3       | 644,7       |       |
|                                | Q1-Q3        | 286.2-770.8 | 505.0-913.5 | 524.9-745.2 |       |
| activin-A (pg/ml) at 2 Months  | n            | 5           | 7           | 5           | 0,208 |
|                                | Median       | 447,5       | 390,4       | 562,2       |       |
|                                | Q1-Q3        | 436.9-488.4 | 280.0-477.3 | 538.3-627.9 |       |
| activin-A (pg/ml) at 4 Months  | n            | 3           | 5           | 3           | 0,338 |
|                                | Median       | 412,5       | 468,3       | 223,6       |       |
|                                | Q1-Q3        | 355.4-580.9 | 418.7-519.6 | 186.1-492.5 |       |
| activin-A (pg/ml) at 6 Months  | n            | 2           | 5           | 2           | 0,318 |
|                                | Median       | 344,2       | 504,5       | 296,9       |       |
|                                | Q1-Q3        | 300.0-388.3 | 372.6-593.8 | 215.0-378.7 |       |
| activin-A (pg/ml) at 8 Months  | n            | 2           | 4           | 2           | 0,069 |
|                                | Median       | 289,6       | 488,5       | 275,4       |       |
|                                | Q1-Q3        | 213.5-365.7 | 428.7-760.3 | 231.9-319.0 |       |
| activin-A (pg/ml) at 10 Months | n            | 2           | 3           | 2           | 0,292 |
|                                | Median       | 360,2       | 422,7       | 242,4       |       |
|                                | Q1-Q3        | 357.5-362.8 | 280.5-467.5 | 201.0-283.8 |       |
| activin-A (pg/ml) at 12 Months | n            | 1           | 1           | 0           |       |
|                                | Median       | 256,8       | 318,2       | .           |       |
|                                | Q1-Q3        | 256.8-256.8 | 318.2-318.2 | .-.         |       |
|                                | CCL3 (ng/ml) |             |             |             |       |
| CCL3 (ng/ml) at baseline       | n            | 7           | 11          | 6           | 0,644 |
|                                | Median       | 76,6        | 79          | 77,1        |       |
|                                | Q1-Q3        | 22.8-100.9  | 70.9-98.9   | 10.2-88.1   |       |
| CCL3 (ng/ml) at 2 Months       | n            | 5           | 7           | 5           | 0,836 |
|                                | Median       | 70,5        | 67,4        | 71,2        |       |
|                                | Q1-Q3        | 39.0-83.2   | 44.0-102.7  | 45.7-76.3   |       |

|                           |        |           |           |           |       |
|---------------------------|--------|-----------|-----------|-----------|-------|
| CCL3 (ng/ml) at 4 Months  | n      | 3         | 5         | 3         | 0,814 |
|                           | Median | 63,3      | 68        | 69,6      |       |
|                           | Q1-Q3  | 32.8-82.9 | 47.0-68.0 | 61.3-72.0 |       |
| CCL3 (ng/ml) at 6 Months  | n      | 2         | 5         | 2         | 0,340 |
|                           | Median | 69,3      | 61,2      | 67,6      |       |
|                           | Q1-Q3  | 67.4-71.1 | 54.0-61.3 | 62.1-73.1 |       |
| CCL3 (ng/ml) at 8 Months  | n      | 2         | 4         | 2         | 0,105 |
|                           | Median | 58,9      | 38,1      | 77,9      |       |
|                           | Q1-Q3  | 54.3-63.5 | 14.9-58.1 | 66.9-88.9 |       |
| CCL3 (ng/ml) at 10 Months | n      | 2         | 3         | 2         | 0,095 |
|                           | Median | 58,4      | 9,1       | 54,3      |       |
|                           | Q1-Q3  | 56.0-60.8 | 3.3-14.2  | 50.7-57.9 |       |
| CCL3 (ng/ml) at 12 Months | n      | 1         | 1         | 0         |       |
|                           | Median | 64,3      | 3,9       | .         |       |
|                           | Q1-Q3  | 64.3-64.3 | 3.9-3.9   | .-.       |       |

---

<sup>a</sup> Kruskal-Wallis test

Table S5. Biomarker values at each timepoint, by ISS stage at Kd initiation

|                                 |        | ISS at Kd initiation |           |           |                      |
|---------------------------------|--------|----------------------|-----------|-----------|----------------------|
|                                 |        | I                    | II        | III       |                      |
|                                 |        | n (%)                | n (%)     | n (%)     | p-value <sup>a</sup> |
| bALP (µg/L)                     |        |                      |           |           |                      |
| bALP (µg/L) at baseline         | n      | 9                    | 7         | 8         | 0,996                |
|                                 | Median | 11,1                 | 11,2      | 10,5      |                      |
|                                 | Q1-Q3  | 10.4-11.3            | 7.8-14.0  | 9.5-11.6  |                      |
| bALP (µg/L) at 2 Months         | n      | 9                    | 3         | 5         | 0,815                |
|                                 | Median | 11,7                 | 9,1       | 12,8      |                      |
|                                 | Q1-Q3  | 9.4-12.9             | 7.8-19.1  | 12.4-15.4 |                      |
| bALP (µg/L) at 4 Months         | n      | 7                    | 2         | 2         | 0,842                |
|                                 | Median | 11,9                 | 11,4      | 10,9      |                      |
|                                 | Q1-Q3  | 9.1-14.4             | 11.3-11.6 | 8.9-12.9  |                      |
| bALP (µg/L) at 6 Months         | n      | 7                    | 0         | 2         | 0,380                |
|                                 | Median | 13,6                 | .         | 10,3      |                      |
|                                 | Q1-Q3  | 8.1-14.8             | .-.       | 6.8-13.7  |                      |
| bALP (µg/L) at 8 Months         | n      | 6                    | 0         | 2         | 0,739                |
|                                 | Median | 16                   | .         | 11,3      |                      |
|                                 | Q1-Q3  | 6.8-18.0             | .-.       | 5.6-16.9  |                      |
| bALP (µg/L) at 10 Months        | n      | 5                    | 0         | 2         | 0,699                |
|                                 | Median | 15                   | .         | 12        |                      |
|                                 | Q1-Q3  | 9.8-15.8             | .-.       | 5.9-18.1  |                      |
| bALP (µg/L) at 12 Months        | n      | 2                    | 0         | 0         |                      |
|                                 | Median | 17,1                 | .         | .         |                      |
|                                 | Q1-Q3  | 14.5-19.7            | .-.       | .-.       |                      |
| Osteocalcin (ng/ml)             |        |                      |           |           |                      |
| Osteocalcin (ng/ml) at baseline | n      | 9                    | 7         | 8         | 0,642                |
|                                 | Median | 9,2                  | 7,5       | 10,5      |                      |
|                                 | Q1-Q3  | 6.4-10.8             | 2.9-10.8  | 4.9-18.2  |                      |
| Osteocalcin (ng/ml) at 2 Months | n      | 9                    | 3         | 5         | 0,348                |
|                                 | Median | 12,2                 | 9,4       | 9,4       |                      |
|                                 | Q1-Q3  | 10.5-14.9            | 3.5-10.5  | 5.8-14.1  |                      |

|                                  |        |             |             |             |       |
|----------------------------------|--------|-------------|-------------|-------------|-------|
| Osteocalcin (ng/ml) at 4 Months  | n      | 7           | 2           | 2           | 0,363 |
|                                  | Median | 17,2        | 6,6         | 14,8        |       |
|                                  | Q1-Q3  | 11.2-19.2   | 1.0-12.3    | 9.9-19.7    |       |
| Osteocalcin (ng/ml) at 6 Months  | n      | 7           | 0           | 2           | 0,770 |
|                                  | Median | 13,9        | .           | 18,2        |       |
|                                  | Q1-Q3  | 10.8-18.9   | .-.         | 11.1-25.4   |       |
| Osteocalcin (ng/ml) at 8 Months  | n      | 6           | 0           | 2           | 0,739 |
|                                  | Median | 15,9        | .           | 19,1        |       |
|                                  | Q1-Q3  | 6.0-17.8    | .-.         | 8.5-29.8    |       |
| Osteocalcin (ng/ml) at 10 Months | n      | 5           | 0           | 2           | 0,699 |
|                                  | Median | 16,8        | .           | 16          |       |
|                                  | Q1-Q3  | 8.9-17.7    | .-.         | 3.8-28.2    |       |
| Osteocalcin (ng/ml) at 12 Months | n      | 2           | 0           | 0           |       |
|                                  | Median | 17,1        | .           | .           |       |
|                                  | Q1-Q3  | 13.3-20.8   | .-.         | .-.         |       |
| PINP (pg/ml)                     |        |             |             |             |       |
| PINP (pg/ml) at baseline         | n      | 9           | 7           | 8           | 0,390 |
|                                  | Median | 654,2       | 537         | 330,1       |       |
|                                  | Q1-Q3  | 467.8-1268  | 310.5-750.7 | 234.5-644.7 |       |
| PINP (pg/ml) at 2 Months         | n      | 9           | 3           | 5           | 0,293 |
|                                  | Median | 710,7       | 384,2       | 229,5       |       |
|                                  | Q1-Q3  | 333.2-779.6 | 214.8-569.4 | 139.5-384.9 |       |
| PINP (pg/ml) at 4 Months         | n      | 7           | 2           | 2           | 0,450 |
|                                  | Median | 490,2       | 557,8       | 425,4       |       |
|                                  | Q1-Q3  | 278.5-1567  | 514.2-601.4 | 411.6-439.2 |       |
| PINP (pg/ml) at 6 Months         | n      | 7           | 0           | 2           | 0,143 |
|                                  | Median | 698,7       | .           | 408,7       |       |
|                                  | Q1-Q3  | 439.3-1694  | .-.         | 397.8-419.7 |       |
| PINP (pg/ml) at 8 Months         | n      | 6           | 0           | 2           | 0,182 |
|                                  | Median | 1496        | .           | 461,1       |       |
|                                  | Q1-Q3  | 765.5-2156  | .-.         | 381.1-541.1 |       |
| PINP (pg/ml) at 10 Months        | n      | 5           | 0           | 2           | 0,121 |
|                                  | Median | 1261        | .           | 447,4       |       |

|                            |        |                       |         |             |       |
|----------------------------|--------|-----------------------|---------|-------------|-------|
| PINP (pg/ml) at 12 Months  | Q1-Q3  | 652.0-2567            | .-.     | 335.8-559.0 |       |
|                            | n      | 2                     | 0       | 0           |       |
|                            | Median | 992,5                 | .       | .           |       |
|                            | Q1-Q3  | 701.3-1284            | .-.     | .-.         |       |
|                            |        | <b>CTX(ng/ml)</b>     |         |             |       |
| CTX(ng/ml) at baseline     | n      | 9                     | 7       | 8           | 0,772 |
|                            | Median | 0,8                   | 0,9     | 0,7         |       |
|                            | Q1-Q3  | 0.2-0.9               | 0.2-1.2 | 0.4-0.9     |       |
| CTX(ng/ml) at 2 Months     | n      | 9                     | 3       | 5           | 0,644 |
|                            | Median | 0,5                   | 0,3     | 0,2         |       |
|                            | Q1-Q3  | 0.3-0.6               | 0.1-0.5 | 0.1-0.6     |       |
| CTX(ng/ml) at 4 Months     | n      | 7                     | 2       | 2           | 0,618 |
|                            | Median | 0,3                   | 0,3     | 0,5         |       |
|                            | Q1-Q3  | 0.2-0.5               | 0.2-0.3 | 0.3-0.7     |       |
| CTX(ng/ml) at 6 Months     | n      | 7                     | 0       | 2           | 0,380 |
|                            | Median | 0,2                   | .       | 0,4         |       |
|                            | Q1-Q3  | 0.1-0.4               | .-.     | 0.2-0.6     |       |
| CTX(ng/ml) at 8 Months     | n      | 6                     | 0       | 2           | 0,739 |
|                            | Median | 0,1                   | .       | 0,3         |       |
|                            | Q1-Q3  | 0.1-0.3               | .-.     | 0.1-0.5     |       |
| CTX(ng/ml) at 10 Months    | n      | 5                     | 0       | 2           | 0,699 |
|                            | Median | 0,2                   | .       | 0,2         |       |
|                            | Q1-Q3  | 0.1-0.3               | .-.     | 0.1-0.2     |       |
| CTX(ng/ml) at 12 Months    | n      | 2                     | 0       | 0           |       |
|                            | Median | 0,3                   | .       | .           |       |
|                            | Q1-Q3  | 0.2-0.4               | .-.     | .-.         |       |
|                            |        | <b>TRACP-5B (U/L)</b> |         |             |       |
| TRACP-5B (U/L) at baseline | n      | 9                     | 7       | 8           | 0,629 |
|                            | Median | 2,2                   | 3,6     | 3,6         |       |
|                            | Q1-Q3  | 1.5-3.9               | 1.9-4.8 | 2.0-3.7     |       |
| TRACP-5B (U/L) at 2 Months | n      | 9                     | 3       | 5           | 0,241 |
|                            | Median | 2                     | 1,9     | 1,7         |       |
|                            | Q1-Q3  | 1.0-2.1               | 1.7-2.4 | 0.6-1.8     |       |

|                             |        |         |         |         |        |
|-----------------------------|--------|---------|---------|---------|--------|
| TRACP-5B (U/L) at 4 Months  | n      | 7       | 2       | 2       | 0,299  |
|                             | Median | 1,2     | 2       | 1       |        |
|                             | Q1-Q3  | 0.8-2.0 | 1.9-2.1 | 0.7-1.2 |        |
| TRACP-5B (U/L) at 6 Months  | n      | 7       | 0       | 2       | 0,143  |
|                             | Median | 1,7     | .       | 1       |        |
|                             | Q1-Q3  | 1.1-1.9 | .-.     | 0.9-1.2 |        |
| TRACP-5B (U/L) at 8 Months  | n      | 6       | 0       | 2       | 0,505  |
|                             | Median | 1       | .       | 1       |        |
|                             | Q1-Q3  | 0.8-1.0 | .-.     | 1.0-1.1 |        |
| TRACP-5B (U/L) at 10 Months | n      | 3       | 0       | 2       | 0,564  |
|                             | Median | 0,9     | .       | 0,8     |        |
|                             | Q1-Q3  | 0.9-2.0 | .-.     | 0.8-0.9 |        |
| TRACP-5B (U/L) at 12 Months | n      | 2       | 0       | 0       |        |
|                             | Median | 1,3     | .       | .       |        |
|                             | Q1-Q3  | 0.9-1.8 | .-.     | .-.     |        |
| RANKL (pmol/L)              |        |         |         |         |        |
| RANKL (pmol/L) at baseline  | n      | 9       | 7       | 8       | 0,834  |
|                             | Median | 0,3     | 0,2     | 0,3     |        |
|                             | Q1-Q3  | 0.2-0.4 | 0.1-0.4 | 0.2-0.5 |        |
| RANKL (pmol/L) at 2 Months  | n      | 9       | 3       | 5       | 0,736  |
|                             | Median | 0,2     | 0,2     | 0,2     |        |
|                             | Q1-Q3  | 0.1-0.2 | 0.1-0.2 | 0.1-0.2 |        |
| RANKL (pmol/L) at 4 Months  | n      | 7       | 2       | 2       | 0,718  |
|                             | Median | 0,1     | 0,1     | 0,1     |        |
|                             | Q1-Q3  | 0.1-0.2 | 0.1-0.1 | 0.1-0.1 |        |
| RANKL (pmol/L) at 6 Months  | n      | 7       | 0       | 2       | 0,380  |
|                             | Median | 0,1     | .       | 0,1     |        |
|                             | Q1-Q3  | 0.1-0.2 | .-.     | 0.1-0.1 |        |
| RANKL (pmol/L) at 8 Months  | n      | 6       | 0       | 2       | >0.999 |
|                             | Median | 0,1     | .       | 0,1     |        |
|                             | Q1-Q3  | 0.1-0.1 | .-.     | 0.0-0.1 |        |
| RANKL (pmol/L) at 10 Months | n      | 5       | 0       | 2       | 0,699  |
|                             | Median | 0,1     | .       | 0,1     |        |

|                              |        |           |           |           |       |
|------------------------------|--------|-----------|-----------|-----------|-------|
| RANKL (pmol/L) at 12 Months  | Q1-Q3  | 0.1-0.1   | .-.       | 0.0-0.2   |       |
|                              | n      | 2         | 0         | 0         |       |
|                              | Median | 0,1       | .         | .         |       |
|                              | Q1-Q3  | 0.1-0.2   | .-.       | .-.       |       |
| <b>RANKL/OPG ratio</b>       |        |           |           |           |       |
| RANKL/OPG ratio at baseline  | n      | 9         | 7         | 8         | 0,772 |
|                              | Median | 0,1       | 0,1       | 0,1       |       |
|                              | Q1-Q3  | 0.0-0.1   | 0.0-0.1   | 0.0-0.1   |       |
| RANKL/OPG ratio at 2 Months  | n      | 9         | 3         | 5         | 0,907 |
|                              | Median | 0         | 0         | 0         |       |
|                              | Q1-Q3  | 0.0-0.0   | 0.0-0.1   | 0.0-0.0   |       |
| RANKL/OPG ratio at 4 Months  | n      | 7         | 2         | 2         | 0,751 |
|                              | Median | 0         | 0         | 0         |       |
|                              | Q1-Q3  | 0.0-0.0   | 0.0-0.0   | 0.0-0.0   |       |
| RANKL/OPG ratio at 6 Months  | n      | 7         | 0         | 2         | 0,242 |
|                              | Median | 0         | .         | 0         |       |
|                              | Q1-Q3  | 0.0-0.0   | .-.       | 0.0-0.0   |       |
| RANKL/OPG ratio at 8 Months  | n      | 6         | 0         | 2         | 0,739 |
|                              | Median | 0         | .         | 0         |       |
|                              | Q1-Q3  | 0.0-0.0   | .-.       | 0.0-0.0   |       |
| RANKL/OPG ratio at 10 Months | n      | 5         | 0         | 2         | 0,699 |
|                              | Median | 0         | .         | 0         |       |
|                              | Q1-Q3  | 0.0-0.0   | .-.       | 0.0-0.0   |       |
| RANKL/OPG ratio at 12 Months | n      | 2         | 0         | 0         |       |
|                              | Median | 0         | .         | .         |       |
|                              | Q1-Q3  | 0.0-0.0   | .-.       | .-.       |       |
| <b>SOST (pmol/L)</b>         |        |           |           |           |       |
| SOST (pmol/L) at baseline    | n      | 9         | 7         | 8         | 0,932 |
|                              | Median | 50,3      | 56,2      | 40,8      |       |
|                              | Q1-Q3  | 37.9-66.3 | 37.7-65.6 | 38.8-64.4 |       |
| SOST (pmol/L) at 2 Months    | n      | 9         | 3         | 5         | 0,761 |
|                              | Median | 37,2      | 38,2      | 29,4      |       |
|                              | Q1-Q3  | 34.0-48.3 | 33.8-41.7 | 22.0-40.7 |       |

|                            |        |           |           |            |        |
|----------------------------|--------|-----------|-----------|------------|--------|
| SOST (pmol/L) at 4 Months  | n      | 7         | 2         | 2          | 0,212  |
|                            | Median | 36,7      | 34,1      | 26         |        |
|                            | Q1-Q3  | 32.8-77.1 | 25.0-43.3 | 22.3-29.7  |        |
| SOST (pmol/L) at 6 Months  | n      | 7         | 0         | 2          | 0,770  |
|                            | Median | 31,8      | .         | 57,2       |        |
|                            | Q1-Q3  | 25.5-63.1 | .-.       | 21.6-92.9  |        |
| SOST (pmol/L) at 8 Months  | n      | 6         | 0         | 2          | >0.999 |
|                            | Median | 28        | .         | 66,8       |        |
|                            | Q1-Q3  | 23.5-44.3 | .-.       | 20.4-113.2 |        |
| SOST (pmol/L) at 10 Months | n      | 5         | 0         | 2          | 0,439  |
|                            | Median | 36,9      | .         | 29,9       |        |
|                            | Q1-Q3  | 21.1-64.7 | .-.       | 19.3-40.5  |        |
| SOST (pmol/L) at 12 Months | n      | 2         | 0         | 0          |        |
|                            | Median | 27,8      | .         | .          |        |
|                            | Q1-Q3  | 20.0-35.7 | .-.       | .-.        |        |
| Dkk1 (pmol/L)              |        |           |           |            |        |
| Dkk1 (pmol/L) at baseline  | n      | 9         | 7         | 8          | 0,258  |
|                            | Median | 54,7      | 35,5      | 39,7       |        |
|                            | Q1-Q3  | 38.0-76.6 | 21.2-46.8 | 20.7-47.0  |        |
| Dkk1 (pmol/L) at 2 Months  | n      | 9         | 3         | 5          | 0,731  |
|                            | Median | 42        | 24,4      | 31,4       |        |
|                            | Q1-Q3  | 29.1-58.4 | 10.8-76.2 | 26.9-67.5  |        |
| Dkk1 (pmol/L) at 4 Months  | n      | 7         | 2         | 2          | 0,181  |
|                            | Median | 33,7      | 60,7      | 20,6       |        |
|                            | Q1-Q3  | 15.9-57.5 | 58.4-62.9 | 18.5-22.8  |        |
| Dkk1 (pmol/L) at 6 Months  | n      | 7         | 0         | 2          | 0,558  |
|                            | Median | 39,7      | .         | 34,5       |        |
|                            | Q1-Q3  | 21.2-52.4 | .-.       | 32.0-37.0  |        |
| Dkk1 (pmol/L) at 8 Months  | n      | 6         | 0         | 2          | 0,739  |
|                            | Median | 29        | .         | 29,1       |        |
|                            | Q1-Q3  | 19.2-31.0 | .-.       | 23.8-34.4  |        |
| Dkk1 (pmol/L) at 10 Months | n      | 5         | 0         | 2          | 0,699  |
|                            | Median | 26,1      | .         | 19,7       |        |



|                                |                          |             |             |             |       |
|--------------------------------|--------------------------|-------------|-------------|-------------|-------|
| Dkk1 (pmol/L) at 12 Months     | Q1-Q3                    | 16.3-28.7   | .-.         | 8.4-31.0    |       |
|                                | n                        | 2           | 0           | 0           |       |
|                                | Median                   | 14,4        | .           | .           |       |
|                                | Q1-Q3                    | 8.4-20.4    | .-.         | .-.         |       |
|                                | <b>activin-A (pg/ml)</b> |             |             |             |       |
| activin-A (pg/ml) at baseline  | n                        | 9           | 7           | 8           | 0,829 |
|                                | Median                   | 636,1       | 694,3       | 620,2       |       |
|                                | Q1-Q3                    | 524.9-913.5 | 548.3-902.7 | 349.3-833.2 |       |
| activin-A (pg/ml) at 2 Months  | n                        | 9           | 3           | 5           | 0,143 |
|                                | Median                   | 436,9       | 517,7       | 562,2       |       |
|                                | Q1-Q3                    | 315.5-462.2 | 321.0-538.3 | 488.4-627.9 |       |
| activin-A (pg/ml) at 4 Months  | n                        | 7           | 2           | 2           | 0,254 |
|                                | Median                   | 412,5       | 383,5       | 698,6       |       |
|                                | Q1-Q3                    | 334.5-468.3 | 186.1-580.9 | 492.5-904.7 |       |
| activin-A (pg/ml) at 6 Months  | n                        | 7           | 0           | 2           | 0,380 |
|                                | Median                   | 372,6       | .           | 486,3       |       |
|                                | Q1-Q3                    | 300.0-504.5 | .-.         | 378.7-593.8 |       |
| activin-A (pg/ml) at 8 Months  | n                        | 6           | 0           | 2           | 0,739 |
|                                | Median                   | 392         | .           | 607,3       |       |
|                                | Q1-Q3                    | 319.0-439.0 | .-.         | 231.9-982.7 |       |
| activin-A (pg/ml) at 10 Months | n                        | 5           | 0           | 2           | 0,699 |
|                                | Median                   | 357,5       | .           | 353,2       |       |
|                                | Q1-Q3                    | 280.5-362.8 | .-.         | 283.8-422.7 |       |
| activin-A (pg/ml) at 12 Months | n                        | 2           | 0           | 0           |       |
|                                | Median                   | 287,5       | .           | .           |       |
|                                | Q1-Q3                    | 256.8-318.2 | .-.         | .-.         |       |
|                                | <b>CCL3 (ng/ml)</b>      |             |             |             |       |
| CCL3 (ng/ml) at baseline       | n                        | 9           | 7           | 8           | 0,395 |
|                                | Median                   | 76,6        | 81,3        | 70,6        |       |
|                                | Q1-Q3                    | 72.4-98.9   | 22.8-105.8  | 32.2-84.2   |       |
| CCL3 (ng/ml) at 2 Months       | n                        | 9           | 3           | 5           | 0,106 |
|                                | Median                   | 83,2        | 44          | 45,7        |       |
|                                | Q1-Q3                    | 70.5-97.0   | 11.1-76.3   | 39.0-61.2   |       |

|                           |        |           |           |           |       |
|---------------------------|--------|-----------|-----------|-----------|-------|
| CCL3 (ng/ml) at 4 Months  | n      | 7         | 2         | 2         | 0,239 |
|                           | Median | 68        | 47        | 59,5      |       |
|                           | Q1-Q3  | 63.3-82.9 | 32.8-61.3 | 47.0-72.0 |       |
| CCL3 (ng/ml) at 6 Months  | n      | 7         | 0         | 2         | 0,770 |
|                           | Median | 62,1      | .         | 67,2      |       |
|                           | Q1-Q3  | 54.0-71.1 | .-.       | 61.2-73.1 |       |
| CCL3 (ng/ml) at 8 Months  | n      | 6         | 0         | 2         | 0,739 |
|                           | Median | 58,1      | .         | 55        |       |
|                           | Q1-Q3  | 54.3-63.5 | .-.       | 21.1-88.9 |       |
| CCL3 (ng/ml) at 10 Months | n      | 5         | 0         | 2         | 0,245 |
|                           | Median | 56        | .         | 27        |       |
|                           | Q1-Q3  | 14.2-57.9 | .-.       | 3.3-50.7  |       |
| CCL3 (ng/ml) at 12 Months | n      | 2         | 0         | 0         |       |
|                           | Median | 34,1      | .         | .         |       |
|                           | Q1-Q3  | 3.9-64.3  | .-.       | .-.       |       |

---

<sup>a</sup> Kruskal-Wallis test

Table S6. Biomarker values at each timepoint, by R-ISS stage at Kd initiation

|                                 |        | R-ISS at Kd initiation |           |           | p-value <sup>a</sup> |
|---------------------------------|--------|------------------------|-----------|-----------|----------------------|
|                                 |        | I                      | II        | III       |                      |
|                                 |        | n (%)                  | n (%)     | n (%)     |                      |
|                                 |        | bALP (µg/L)            |           |           |                      |
| bALP (µg/L) at baseline         | n      | 5                      | 12        | 7         | 0,559                |
|                                 | Median | 11,3                   | 10,7      | 10,5      |                      |
|                                 | Q1-Q3  | 10.7-11.7              | 8.1-11.5  | 10.0-11.7 |                      |
| bALP (µg/L) at 2 Months         | n      | 4                      | 8         | 5         | 0,403                |
|                                 | Median | 12,5                   | 9,3       | 12,8      |                      |
|                                 | Q1-Q3  | 9.8-16.0               | 7.9-14.8  | 12.4-15.4 |                      |
| bALP (µg/L) at 4 Months         | n      | 2                      | 6         | 3         | 0,761                |
|                                 | Median | 12,7                   | 11,2      | 12,9      |                      |
|                                 | Q1-Q3  | 11.3-14.1              | 9.1-11.9  | 8.9-14.4  |                      |
| bALP (µg/L) at 6 Months         | n      | 2                      | 4         | 3         | 0,555                |
|                                 | Median | 14,2                   | 9,8       | 13,7      |                      |
|                                 | Q1-Q3  | 13.6-14.8              | 7.6-13.2  | 6.8-19.7  |                      |
| bALP (µg/L) at 8 Months         | n      | 2                      | 3         | 3         | 0,368                |
|                                 | Median | 17,3                   | 6,8       | 16,9      |                      |
|                                 | Q1-Q3  | 15.0-19.6              | 3.8-16.9  | 5.6-18.0  |                      |
| bALP (µg/L) at 10 Months        | n      | 1                      | 3         | 3         | 0,751                |
|                                 | Median | 15                     | 9,8       | 18,1      |                      |
|                                 | Q1-Q3  | 15.0-15.0              | 7.0-15.8  | 5.9-20.0  |                      |
| bALP (µg/L) at 12 Months        | n      | 1                      | 1         | 0         |                      |
|                                 | Median | 14,5                   | 19,7      | .         |                      |
|                                 | Q1-Q3  | 14.5-14.5              | 19.7-19.7 | .-.       |                      |
|                                 |        | Osteocalcin (ng/ml)    |           |           |                      |
| Osteocalcin (ng/ml) at baseline | n      | 5                      | 12        | 7         | 0,651                |
|                                 | Median | 9,9                    | 8,3       | 9,1       |                      |
|                                 | Q1-Q3  | 6.6-11.2               | 4.0-10.8  | 3.9-18.9  |                      |
| Osteocalcin (ng/ml) at 2 Months | n      | 4                      | 8         | 5         | 0,449                |
|                                 | Median | 13,2                   | 10,7      | 8,8       |                      |
|                                 | Q1-Q3  | 7.9-14.5               | 10.0-16.0 | 5.8-9.4   |                      |

|                                  |        |             |             |             |       |
|----------------------------------|--------|-------------|-------------|-------------|-------|
| Osteocalcin (ng/ml) at 4 Months  | n      | 2           | 6           | 3           | 0,886 |
|                                  | Median | 10,1        | 14,8        | 11,2        |       |
|                                  | Q1-Q3  | 1.0-19.2    | 12.3-17.7   | 9.9-19.7    |       |
| Osteocalcin (ng/ml) at 6 Months  | n      | 2           | 4           | 3           | 0,233 |
|                                  | Median | 21,4        | 11,8        | 13,9        |       |
|                                  | Q1-Q3  | 16.2-26.7   | 7.4-15.8    | 11.1-25.4   |       |
| Osteocalcin (ng/ml) at 8 Months  | n      | 2           | 3           | 3           | 0,103 |
|                                  | Median | 29          | 6           | 16,9        |       |
|                                  | Q1-Q3  | 17.8-40.1   | 5.6-14.9    | 8.5-29.8    |       |
| Osteocalcin (ng/ml) at 10 Months | n      | 1           | 3           | 3           | 0,368 |
|                                  | Median | 17,7        | 8,9         | 19,7        |       |
|                                  | Q1-Q3  | 17.7-17.7   | 2.8-16.8    | 3.8-28.2    |       |
| Osteocalcin (ng/ml) at 12 Months | n      | 1           | 1           | 0           |       |
|                                  | Median | 20,8        | 13,3        | .           |       |
|                                  | Q1-Q3  | 20.8-20.8   | 13.3-13.3   | .-.         |       |
| PINP (pg/ml)                     |        |             |             |             |       |
| PINP (pg/ml) at baseline         | n      | 5           | 12          | 7           | 0,899 |
|                                  | Median | 654,2       | 512,4       | 547,4       |       |
|                                  | Q1-Q3  | 362.7-780.4 | 301.3-667.0 | 253.1-742.1 |       |
| PINP (pg/ml) at 2 Months         | n      | 4           | 8           | 5           | 0,235 |
|                                  | Median | 674,5       | 358,7       | 229,5       |       |
|                                  | Q1-Q3  | 477.1-1074  | 220.6-630.7 | 139.5-1020  |       |
| PINP (pg/ml) at 4 Months         | n      | 2           | 6           | 3           | 0,469 |
|                                  | Median | 1041        | 474,8       | 439,2       |       |
|                                  | Q1-Q3  | 514.2-1567  | 278.5-601.4 | 411.6-1897  |       |
| PINP (pg/ml) at 6 Months         | n      | 2           | 4           | 3           | 0,326 |
|                                  | Median | 1242        | 441         | 419,7       |       |
|                                  | Q1-Q3  | 789.0-1694  | 267.4-570.7 | 397.8-2056  |       |
| PINP (pg/ml) at 8 Months         | n      | 2           | 3           | 3           | 0,574 |
|                                  | Median | 1580        | 765,5       | 541,1       |       |
|                                  | Q1-Q3  | 1004-2156   | 198.9-3505  | 381.1-1988  |       |
| PINP (pg/ml) at 10 Months        | n      | 1           | 3           | 3           | 0,751 |
|                                  | Median | 1261        | 652         | 559         |       |

|                            |        |           |             |            |       |
|----------------------------|--------|-----------|-------------|------------|-------|
| PINP (pg/ml) at 12 Months  | Q1-Q3  | 1261-1261 | 447.6-3650  | 335.8-2567 |       |
|                            | n      | 1         | 1           | 0          |       |
|                            | Median | 1284      | 701,3       | .          |       |
|                            | Q1-Q3  | 1284-1284 | 701.3-701.3 | .-.        |       |
| <b>CTX(ng/ml)</b>          |        |           |             |            |       |
| CTX(ng/ml) at baseline     | n      | 5         | 12          | 7          | 0,713 |
|                            | Median | 0,7       | 0,7         | 0,8        |       |
|                            | Q1-Q3  | 0.6-0.8   | 0.2-1.0     | 0.4-1.0    |       |
| CTX(ng/ml) at 2 Months     | n      | 4         | 8           | 5          | 0,886 |
|                            | Median | 0,4       | 0,3         | 0,6        |       |
|                            | Q1-Q3  | 0.3-0.6   | 0.2-0.6     | 0.1-0.6    |       |
| CTX(ng/ml) at 4 Months     | n      | 2         | 6           | 3          | 0,469 |
|                            | Median | 0,3       | 0,3         | 0,3        |       |
|                            | Q1-Q3  | 0.2-0.3   | 0.2-0.5     | 0.3-0.7    |       |
| CTX(ng/ml) at 6 Months     | n      | 2         | 4           | 3          | 0,555 |
|                            | Median | 0,4       | 0,2         | 0,2        |       |
|                            | Q1-Q3  | 0.3-0.4   | 0.1-0.4     | 0.2-0.6    |       |
| CTX(ng/ml) at 8 Months     | n      | 2         | 3           | 3          | 0,986 |
|                            | Median | 0,2       | 0,2         | 0,1        |       |
|                            | Q1-Q3  | 0.1-0.3   | 0.0-0.5     | 0.1-0.5    |       |
| CTX(ng/ml) at 10 Months    | n      | 1         | 3           | 3          | 0,565 |
|                            | Median | 0,3       | 0,2         | 0,1        |       |
|                            | Q1-Q3  | 0.3-0.3   | 0.1-0.4     | 0.1-0.2    |       |
| CTX(ng/ml) at 12 Months    | n      | 1         | 1           | 0          |       |
|                            | Median | 0,2       | 0,4         | .          |       |
|                            | Q1-Q3  | 0.2-0.2   | 0.4-0.4     | .-.        |       |
| <b>TRACP-5B (U/L)</b>      |        |           |             |            |       |
| TRACP-5B (U/L) at baseline | n      | 5         | 12          | 7          | 0,35  |
|                            | Median | 2,2       | 2,8         | 3,7        |       |
|                            | Q1-Q3  | 1.6-3.3   | 1.7-4.1     | 2.7-5.0    |       |
| TRACP-5B (U/L) at 2 Months | n      | 4         | 8           | 5          | 0,936 |
|                            | Median | 2         | 1,8         | 1,8        |       |
|                            | Q1-Q3  | 1.3-2.5   | 0.9-2.1     | 1.7-1.9    |       |

|                             |        |         |         |         |       |
|-----------------------------|--------|---------|---------|---------|-------|
| TRACP-5B (U/L) at 4 Months  | n      | 2       | 6       | 3       | 0,218 |
|                             | Median | 2,1     | 1,2     | 1,2     |       |
|                             | Q1-Q3  | 1.9-2.2 | 0.8-2.0 | 0.7-1.2 |       |
| TRACP-5B (U/L) at 6 Months  | n      | 2       | 4       | 3       | 0,108 |
|                             | Median | 1,8     | 1,6     | 1       |       |
|                             | Q1-Q3  | 1.7-1.9 | 1.2-8.9 | 0.9-1.2 |       |
| TRACP-5B (U/L) at 8 Months  | n      | 2       | 3       | 3       | 0,707 |
|                             | Median | 1       | 0,8     | 1       |       |
|                             | Q1-Q3  | 0.9-1.0 | 0.6-2.2 | 1.0-1.1 |       |
| TRACP-5B (U/L) at 10 Months | n      | 1       | 1       | 3       | 0,344 |
|                             | Median | 0,9     | 2       | 0,9     |       |
|                             | Q1-Q3  | 0.9-0.9 | 2.0-2.0 | 0.8-0.9 |       |
| TRACP-5B (U/L) at 12 Months | n      | 1       | 1       | 0       |       |
|                             | Median | 0,9     | 1,8     | .       |       |
|                             | Q1-Q3  | 0.9-0.9 | 1.8-1.8 | .-.     |       |
| RANKL (pmol/L)              |        |         |         |         |       |
| RANKL (pmol/L) at baseline  | n      | 5       | 12      | 7       | 0,686 |
|                             | Median | 0,2     | 0,2     | 0,4     |       |
|                             | Q1-Q3  | 0.2-0.3 | 0.1-0.4 | 0.1-0.5 |       |
| RANKL (pmol/L) at 2 Months  | n      | 4       | 8       | 5       | 0,659 |
|                             | Median | 0,2     | 0,2     | 0,2     |       |
|                             | Q1-Q3  | 0.2-0.2 | 0.1-0.2 | 0.1-0.2 |       |
| RANKL (pmol/L) at 4 Months  | n      | 2       | 6       | 3       | 0,635 |
|                             | Median | 0,1     | 0,1     | 0,1     |       |
|                             | Q1-Q3  | 0.1-0.1 | 0.1-0.2 | 0.1-0.1 |       |
| RANKL (pmol/L) at 6 Months  | n      | 2       | 4       | 3       | 0,432 |
|                             | Median | 0,1     | 0,1     | 0,1     |       |
|                             | Q1-Q3  | 0.1-0.1 | 0.1-0.2 | 0.1-0.1 |       |
| RANKL (pmol/L) at 8 Months  | n      | 2       | 3       | 3       | 0,506 |
|                             | Median | 0,1     | 0,1     | 0       |       |
|                             | Q1-Q3  | 0.1-0.1 | 0.1-0.2 | 0.0-0.1 |       |
| RANKL (pmol/L) at 10 Months | n      | 1       | 3       | 3       | 0,526 |
|                             | Median | 0,1     | 0,1     | 0       |       |

|                              |        |           |           |           |       |
|------------------------------|--------|-----------|-----------|-----------|-------|
| RANKL (pmol/L) at 12 Months  | Q1-Q3  | 0.1-0.1   | 0.1-0.3   | 0.0-0.2   |       |
|                              | n      | 1         | 1         | 0         |       |
|                              | Median | 0,1       | 0,2       | .         |       |
|                              | Q1-Q3  | 0.1-0.1   | 0.2-0.2   | .-.       |       |
| <b>RANKL/OPG ratio</b>       |        |           |           |           |       |
| RANKL/OPG ratio at baseline  | n      | 5         | 12        | 7         | 0,694 |
|                              | Median | 0,1       | 0,1       | 0,1       |       |
|                              | Q1-Q3  | 0.1-0.1   | 0.0-0.1   | 0.0-0.1   |       |
| RANKL/OPG ratio at 2 Months  | n      | 4         | 8         | 5         | 0,692 |
|                              | Median | 0         | 0         | 0         |       |
|                              | Q1-Q3  | 0.0-0.1   | 0.0-0.1   | 0.0-0.0   |       |
| RANKL/OPG ratio at 4 Months  | n      | 2         | 6         | 3         | 0,635 |
|                              | Median | 0         | 0         | 0         |       |
|                              | Q1-Q3  | 0.0-0.0   | 0.0-0.0   | 0.0-0.0   |       |
| RANKL/OPG ratio at 6 Months  | n      | 2         | 4         | 3         | 0,112 |
|                              | Median | 0         | 0         | 0         |       |
|                              | Q1-Q3  | 0.0-0.0   | 0.0-0.0   | 0.0-0.0   |       |
| RANKL/OPG ratio at 8 Months  | n      | 2         | 3         | 3         | 0,236 |
|                              | Median | 0         | 0         | 0         |       |
|                              | Q1-Q3  | 0.0-0.0   | 0.0-0.0   | 0.0-0.0   |       |
| RANKL/OPG ratio at 10 Months | n      | 1         | 3         | 3         | 0,368 |
|                              | Median | 0         | 0         | 0         |       |
|                              | Q1-Q3  | 0.0-0.0   | 0.0-0.1   | 0.0-0.0   |       |
| RANKL/OPG ratio at 12 Months | n      | 1         | 1         | 0         |       |
|                              | Median | 0         | 0         | .         |       |
|                              | Q1-Q3  | 0.0-0.0   | 0.0-0.0   | .-.       |       |
| <b>SOST (pmol/L)</b>         |        |           |           |           |       |
| SOST (pmol/L) at baseline    | n      | 5         | 12        | 7         | 0,326 |
|                              | Median | 44,8      | 58,7      | 39,4      |       |
|                              | Q1-Q3  | 41.4-65.6 | 39.7-68.5 | 33.2-64.1 |       |
| SOST (pmol/L) at 2 Months    | n      | 4         | 8         | 5         | 0,356 |
|                              | Median | 35,1      | 40,9      | 29,4      |       |
|                              | Q1-Q3  | 24.4-37.2 | 35.5-49.0 | 27.9-40.7 |       |

|                            |        |           |            |            |       |
|----------------------------|--------|-----------|------------|------------|-------|
| SOST (pmol/L) at 4 Months  | n      | 2         | 6          | 3          | 0,073 |
|                            | Median | 38        | 41,2       | 22,8       |       |
|                            | Q1-Q3  | 32.8-43.3 | 33.2-77.1  | 22.3-29.7  |       |
| SOST (pmol/L) at 6 Months  | n      | 2         | 4          | 3          | 0,607 |
|                            | Median | 28,8      | 55,6       | 25,5       |       |
|                            | Q1-Q3  | 25.8-31.8 | 35.5-106.4 | 21.6-92.9  |       |
| SOST (pmol/L) at 8 Months  | n      | 2         | 3          | 3          | 0,405 |
|                            | Median | 24,8      | 44,3       | 21,2       |       |
|                            | Q1-Q3  | 23.5-26.2 | 29.9-63.5  | 20.4-113.2 |       |
| SOST (pmol/L) at 10 Months | n      | 1         | 3          | 3          | 0,208 |
|                            | Median | 21,1      | 64,7       | 20,2       |       |
|                            | Q1-Q3  | 21.1-21.1 | 36.9-82.1  | 19.3-40.5  |       |
| SOST (pmol/L) at 12 Months | n      | 1         | 1          | 0          |       |
|                            | Median | 20        | 35,7       | .          |       |
|                            | Q1-Q3  | 20.0-20.0 | 35.7-35.7  | .-.        |       |
| Dkk1 (pmol/L)              |        |           |            |            |       |
| Dkk1 (pmol/L) at baseline  | n      | 5         | 12         | 7          | 0,752 |
|                            | Median | 38        | 41,2       | 43         |       |
|                            | Q1-Q3  | 37.5-41.2 | 26.3-76.2  | 25.1-54.7  |       |
| Dkk1 (pmol/L) at 2 Months  | n      | 4         | 8          | 5          | 0,649 |
|                            | Median | 30,6      | 42,2       | 42         |       |
|                            | Q1-Q3  | 24.2-49.7 | 25.7-67.3  | 31.4-67.5  |       |
| Dkk1 (pmol/L) at 4 Months  | n      | 2         | 6          | 3          | 0,695 |
|                            | Median | 43,1      | 45,6       | 22,8       |       |
|                            | Q1-Q3  | 27.8-58.4 | 15.9-62.9  | 18.5-46.5  |       |
| Dkk1 (pmol/L) at 6 Months  | n      | 2         | 4          | 3          | 0,449 |
|                            | Median | 27,6      | 46,1       | 37         |       |
|                            | Q1-Q3  | 21.2-34.0 | 24.7-53.6  | 32.0-49.2  |       |
| Dkk1 (pmol/L) at 8 Months  | n      | 2         | 3          | 3          | 0,119 |
|                            | Median | 12,6      | 31         | 29,7       |       |
|                            | Q1-Q3  | 5.9-19.2  | 28.2-51.3  | 23.8-34.4  |       |
| Dkk1 (pmol/L) at 10 Months | n      | 1         | 3          | 3          | 0,565 |
|                            | Median | 9,1       | 26,1       | 31         |       |



|                                |              |             |             |             |       |
|--------------------------------|--------------|-------------|-------------|-------------|-------|
| Dkk1 (pmol/L) at 12 Months     | Q1-Q3        | 9.1-9.1     | 16.3-28.7   | 8.4-38.7    |       |
|                                | n            | 1           | 1           | 0           |       |
|                                | Median       | 8,4         | 20,4        | .           |       |
|                                | Q1-Q3        | 8.4-8.4     | 20.4-20.4   | .-.         |       |
| activin-A (pg/ml)              |              |             |             |             |       |
| activin-A (pg/ml) at baseline  | n            | 5           | 12          | 7           | 0,537 |
|                                | Median       | 770,8       | 652         | 524,9       |       |
|                                | Q1-Q3        | 614.9-913.5 | 520.3-903.5 | 421.1-745.2 |       |
| activin-A (pg/ml) at 2 Months  | n            | 4           | 8           | 5           | 0,445 |
|                                | Median       | 475,3       | 397,5       | 562,2       |       |
|                                | Q1-Q3        | 454.8-503.1 | 300.5-507.8 | 390.4-627.9 |       |
| activin-A (pg/ml) at 4 Months  | n            | 2           | 6           | 3           | 0,756 |
|                                | Median       | 457,7       | 415,6       | 492,5       |       |
|                                | Q1-Q3        | 334.5-580.9 | 355.4-468.3 | 223.6-904.7 |       |
| activin-A (pg/ml) at 6 Months  | n            | 2           | 4           | 3           | 0,885 |
|                                | Median       | 402,2       | 380,5       | 378,7       |       |
|                                | Q1-Q3        | 300.0-504.5 | 369.7-542.1 | 215.0-593.8 |       |
| activin-A (pg/ml) at 8 Months  | n            | 2           | 3           | 3           | 0,895 |
|                                | Median       | 375,7       | 418,4       | 319         |       |
|                                | Q1-Q3        | 213.5-537.9 | 365.7-439.0 | 231.9-982.7 |       |
| activin-A (pg/ml) at 10 Months | n            | 1           | 3           | 3           | 0,751 |
|                                | Median       | 362,8       | 357,5       | 283,8       |       |
|                                | Q1-Q3        | 362.8-362.8 | 280.5-467.5 | 201.0-422.7 |       |
| activin-A (pg/ml) at 12 Months | n            | 1           | 1           | 0           |       |
|                                | Median       | 256,8       | 318,2       | .           |       |
|                                | Q1-Q3        | 256.8-256.8 | 318.2-318.2 | .-.         |       |
|                                | CCL3 (ng/ml) |             |             |             |       |
| CCL3 (ng/ml) at baseline       | n            | 5           | 12          | 7           | 0,297 |
|                                | Median       | 61,3        | 81,6        | 79          |       |
|                                | Q1-Q3        | 22.8-76.6   | 71.7-101.3  | 62.2-88.1   |       |
| CCL3 (ng/ml) at 2 Months       | n            | 4           | 8           | 5           | 0,258 |
|                                | Median       | 53,2        | 85,9        | 61,2        |       |
|                                | Q1-Q3        | 25.0-75.3   | 57.2-99.9   | 45.7-71.2   |       |

|                           |        |           |           |           |       |
|---------------------------|--------|-----------|-----------|-----------|-------|
| CCL3 (ng/ml) at 4 Months  | n      | 2         | 6         | 3         | 0,635 |
|                           | Median | 50,4      | 65,6      | 69,6      |       |
|                           | Q1-Q3  | 32.8-68.0 | 61.3-82.9 | 47.0-72.0 |       |
| CCL3 (ng/ml) at 6 Months  | n      | 2         | 4         | 3         | 0,962 |
|                           | Median | 64,4      | 62,5      | 62,1      |       |
|                           | Q1-Q3  | 61.3-67.4 | 30.1-72.7 | 61.2-73.1 |       |
| CCL3 (ng/ml) at 8 Months  | n      | 2         | 3         | 3         | 0,566 |
|                           | Median | 54,7      | 61,1      | 66,9      |       |
|                           | Q1-Q3  | 54.3-55.1 | 8.7-63.5  | 21.1-88.9 |       |
| CCL3 (ng/ml) at 10 Months | n      | 1         | 3         | 3         | 0,319 |
|                           | Median | 60,8      | 14,2      | 50,7      |       |
|                           | Q1-Q3  | 60.8-60.8 | 9.1-56.0  | 3.3-57.9  |       |
| CCL3 (ng/ml) at 12 Months | n      | 1         | 1         | 0         |       |
|                           | Median | 64,3      | 3,9       | .         |       |
|                           | Q1-Q3  | 64.3-64.3 | 3.9-3.9   | .-.       |       |

---

<sup>a</sup> Kruskal-Wallis test

Table S7. Biomarker values at each timepoint, by prior ASCT

|                                  |        | Prior ASCT |           |                      |
|----------------------------------|--------|------------|-----------|----------------------|
|                                  |        | Yes        | No        |                      |
|                                  |        | n (%)      | n (%)     | p-value <sup>a</sup> |
| bALP (µg/L)                      |        |            |           |                      |
| bALP (µg/L) at baseline          | n      | 14         | 10        | 0,977                |
|                                  | Median | 11,1       | 10,4      |                      |
|                                  | Q1-Q3  | 9.3-11.5   | 8.9-14.0  |                      |
| bALP (µg/L) at 2 Months          | n      | 10         | 7         | 0,464                |
|                                  | Median | 11,1       | 12,8      |                      |
|                                  | Q1-Q3  | 8.0-12.9   | 9.1-19.1  |                      |
| bALP (µg/L) at 4 Months          | n      | 6          | 5         | >0.999               |
|                                  | Median | 11,9       | 11,6      |                      |
|                                  | Q1-Q3  | 9.1-14.1   | 11.3-11.9 |                      |
| bALP (µg/L) at 6 Months          | n      | 6          | 3         | 0,897                |
|                                  | Median | 13,7       | 11,6      |                      |
|                                  | Q1-Q3  | 8.1-14.8   | 6.8-19.7  |                      |
| bALP (µg/L) at 8 Months          | n      | 6          | 2         | >0.999               |
|                                  | Median | 16         | 11,8      |                      |
|                                  | Q1-Q3  | 6.8-16.9   | 5.6-18.0  |                      |
| bALP (µg/L) at 10 Months         | n      | 5          | 2         | >0.999               |
|                                  | Median | 15         | 12,9      |                      |
|                                  | Q1-Q3  | 9.8-15.8   | 5.9-20.0  |                      |
| bALP (µg/L) at 12 Months         | n      | 2          | 0         |                      |
|                                  | Median | 17,1       | .         |                      |
|                                  | Q1-Q3  | 14.5-19.7  | .-.       |                      |
| Osteocalcin (ng/ml)              |        |            |           |                      |
| Osteocalcin (ng/ml) at baseline  | n      | 14         | 10        | 0,703                |
|                                  | Median | 10         | 7,4       |                      |
|                                  | Q1-Q3  | 5.2-11.2   | 6.4-11.4  |                      |
| Osteocalcin (ng/ml) at 2 Months  | n      | 10         | 7         | <b>0,005</b>         |
|                                  | Median | 13,2       | 5,8       |                      |
|                                  | Q1-Q3  | 10.5-17.8  | 2.0-9.4   |                      |
| Osteocalcin (ng/ml) at 4 Months  | n      | 6          | 5         | 0,235                |
|                                  | Median | 17,5       | 11,2      |                      |
|                                  | Q1-Q3  | 12.4-19.2  | 9.9-12.3  |                      |
| Osteocalcin (ng/ml) at 6 Months  | n      | 6          | 3         | >0.999               |
|                                  | Median | 14,5       | 13,9      |                      |
|                                  | Q1-Q3  | 10.8-25.4  | 11.1-18.9 |                      |
| Osteocalcin (ng/ml) at 8 Months  | n      | 6          | 2         | 0,868                |
|                                  | Median | 16,4       | 12,7      |                      |
|                                  | Q1-Q3  | 6.0-29.8   | 8.5-16.9  |                      |
| Osteocalcin (ng/ml) at 10 Months | n      | 5          | 2         | >0.999               |
|                                  | Median | 16,8       | 11,7      |                      |
|                                  | Q1-Q3  | 8.9-17.7   | 3.8-19.7  |                      |
| Osteocalcin (ng/ml) at 12 Months | n      | 2          | 0         |                      |
|                                  | Median | 17,1       | .         |                      |
|                                  | Q1-Q3  | 13.3-20.8  | .-.       |                      |
| PINP (pg/ml)                     |        |            |           |                      |
| PINP (pg/ml) at baseline         | n      | 14         | 10        | 0,501                |

|                            |                |             |             |        |
|----------------------------|----------------|-------------|-------------|--------|
|                            | Median         | 512,4       | 640,2       |        |
|                            | Q1-Q3          | 215.8-654.2 | 297.5-750.7 |        |
| PINP (pg/ml) at 2 Months   | n              | 10          | 7           | 0,306  |
|                            | Median         | 281,4       | 569,4       |        |
|                            | Q1-Q3          | 214.8-710.7 | 384.2-1020  |        |
| PINP (pg/ml) at 4 Months   | n              | 6           | 5           | 0,411  |
|                            | Median         | 449,4       | 514,2       |        |
|                            | Q1-Q3          | 278.5-777.5 | 490.2-601.4 |        |
| PINP (pg/ml) at 6 Months   | n              | 6           | 3           | >0.999 |
|                            | Median         | 570,7       | 439,3       |        |
|                            | Q1-Q3          | 419.7-789.0 | 397.8-2056  |        |
| PINP (pg/ml) at 8 Months   | n              | 6           | 2           | 0,868  |
|                            | Median         | 884,9       | 1185        |        |
|                            | Q1-Q3          | 541.1-2156  | 381.1-1988  |        |
| PINP (pg/ml) at 10 Months  | n              | 5           | 2           | 0,846  |
|                            | Median         | 652         | 1452        |        |
|                            | Q1-Q3          | 559.0-1261  | 335.8-2567  |        |
| PINP (pg/ml) at 12 Months  | n              | 2           | 0           |        |
|                            | Median         | 992,5       | .           |        |
|                            | Q1-Q3          | 701.3-1284  | .-.         |        |
|                            | CTX(ng/ml)     |             |             |        |
| CTX(ng/ml) at baseline     | n              | 14          | 10          | 0,977  |
|                            | Median         | 0,8         | 0,6         |        |
|                            | Q1-Q3          | 0.2-1.0     | 0.4-0.9     |        |
| CTX(ng/ml) at 2 Months     | n              | 10          | 7           | 0,807  |
|                            | Median         | 0,4         | 0,4         |        |
|                            | Q1-Q3          | 0.1-0.7     | 0.2-0.6     |        |
| CTX(ng/ml) at 4 Months     | n              | 6           | 5           | 0,523  |
|                            | Median         | 0,4         | 0,3         |        |
|                            | Q1-Q3          | 0.2-0.7     | 0.2-0.3     |        |
| CTX(ng/ml) at 6 Months     | n              | 6           | 3           | 0,519  |
|                            | Median         | 0,4         | 0,2         |        |
|                            | Q1-Q3          | 0.1-0.6     | 0.2-0.2     |        |
| CTX(ng/ml) at 8 Months     | n              | 6           | 2           | 0,405  |
|                            | Median         | 0,2         | 0,1         |        |
|                            | Q1-Q3          | 0.1-0.5     | 0.1-0.1     |        |
| CTX(ng/ml) at 10 Months    | n              | 5           | 2           | 0,333  |
|                            | Median         | 0,2         | 0,1         |        |
|                            | Q1-Q3          | 0.2-0.3     | 0.1-0.1     |        |
| CTX(ng/ml) at 12 Months    | n              | 2           | 0           |        |
|                            | Median         | 0,3         | .           |        |
|                            | Q1-Q3          | 0.2-0.4     | .-.         |        |
|                            | TRACP-5B (U/L) |             |             |        |
| TRACP-5B (U/L) at baseline | n              | 14          | 10          | 0,703  |
|                            | Median         | 3,4         | 3,2         |        |
|                            | Q1-Q3          | 1.9-3.7     | 1.5-5.0     |        |
| TRACP-5B (U/L) at 2 Months | n              | 10          | 7           | 0,262  |
|                            | Median         | 1,7         | 1,9         |        |
|                            | Q1-Q3          | 0.8-2.0     | 1.8-2.4     |        |
| TRACP-5B (U/L) at 4 Months | n              | 6           | 5           | 0,784  |

|                             |                |         |         |        |
|-----------------------------|----------------|---------|---------|--------|
| TRACP-5B (U/L) at 6 Months  | Median         | 1,1     | 1,3     | 0,093  |
|                             | Q1-Q3          | 0.8-2.0 | 1.2-1.9 |        |
|                             | n              | 6       | 3       |        |
|                             | Median         | 1,8     | 1       |        |
| TRACP-5B (U/L) at 8 Months  | Q1-Q3          | 1.2-1.9 | 0.9-1.3 | 0,405  |
|                             | n              | 6       | 2       |        |
|                             | Median         | 1       | 1       |        |
|                             | Q1-Q3          | 0.8-1.0 | 1.0-1.1 |        |
| TRACP-5B (U/L) at 10 Months | n              | 3       | 2       | 0,386  |
|                             | Median         | 0,9     | 0,8     |        |
|                             | Q1-Q3          | 0.9-2.0 | 0.8-0.9 |        |
|                             | n              | 2       | 0       |        |
| TRACP-5B (U/L) at 12 Months | Median         | 1,3     | .       |        |
|                             | Q1-Q3          | 0.9-1.8 | .-.     |        |
|                             | RANKL (pmol/L) |         |         |        |
|                             | n              | 14      | 10      |        |
| RANKL (pmol/L) at baseline  | Median         | 0,3     | 0,3     | 0,619  |
|                             | Q1-Q3          | 0.2-0.4 | 0.1-0.4 |        |
|                             | n              | 10      | 7       |        |
|                             | Median         | 0,2     | 0,2     |        |
| RANKL (pmol/L) at 2 Months  | Q1-Q3          | 0.1-0.2 | 0.1-0.2 | 0,884  |
|                             | n              | 6       | 5       |        |
|                             | Median         | 0,1     | 0,1     |        |
|                             | Q1-Q3          | 0.1-0.2 | 0.1-0.1 |        |
| RANKL (pmol/L) at 4 Months  | n              | 6       | 3       | 0,699  |
|                             | Median         | 0,1     | 0,1     |        |
|                             | Q1-Q3          | 0.1-0.2 | 0.1-0.1 |        |
|                             | n              | 6       | 2       |        |
| RANKL (pmol/L) at 6 Months  | Median         | 0,1     | 0,1     | 0,868  |
|                             | Q1-Q3          | 0.1-0.1 | 0.0-0.1 |        |
|                             | n              | 5       | 2       |        |
|                             | Median         | 0,1     | 0,1     |        |
| RANKL (pmol/L) at 8 Months  | Q1-Q3          | 0.1-0.1 | 0.0-0.2 | >0.999 |
|                             | n              | 2       | 0       |        |
|                             | Median         | 0,1     | .       |        |
|                             | Q1-Q3          | 0.1-0.2 | .-.     |        |
| RANKL/OPG ratio             |                |         |         |        |
| RANKL/OPG ratio at baseline | n              | 14      | 10      | 0,464  |
|                             | Median         | 0,1     | 0,1     |        |
|                             | Q1-Q3          | 0.0-0.1 | 0.0-0.1 |        |
|                             | n              | 10      | 7       |        |
| RANKL/OPG ratio at 2 Months | Median         | 0       | 0       | 0,526  |
|                             | Q1-Q3          | 0.0-0.0 | 0.0-0.0 |        |
|                             | n              | 6       | 5       |        |
|                             | Median         | 0       | 0       |        |
| RANKL/OPG ratio at 4 Months | Q1-Q3          | 0.0-0.0 | 0.0-0.0 | 0,784  |
|                             | n              | 6       | 3       |        |
|                             | Median         | 0       | 0       |        |
|                             | Q1-Q3          | 0.0-0.0 | 0.0-0.0 |        |
| RANKL/OPG ratio at 6 Months | n              | 6       | 2       | 0,366  |
|                             | Median         | 0       | 0       |        |
|                             | Q1-Q3          | 0.0-0.0 | 0.0-0.0 |        |
|                             | n              | 6       | 2       |        |
| RANKL/OPG ratio at 8 Months |                |         |         | 0,617  |
|                             |                |         |         |        |
|                             |                |         |         |        |
|                             |                |         |         |        |

|                              |        |           |            |        |
|------------------------------|--------|-----------|------------|--------|
|                              | Median | 0         | 0          |        |
|                              | Q1-Q3  | 0.0-0.0   | 0.0-0.0    |        |
| RANKL/OPG ratio at 10 Months | n      | 5         | 2          | >0.999 |
|                              | Median | 0         | 0          |        |
|                              | Q1-Q3  | 0.0-0.0   | 0.0-0.0    |        |
| RANKL/OPG ratio at 12 Months | n      | 2         | 0          |        |
|                              | Median | 0         | .          |        |
|                              | Q1-Q3  | 0.0-0.0   | .-.        |        |
| <b>SOST (pmol/L)</b>         |        |           |            |        |
| SOST (pmol/L) at baseline    | n      | 14        | 10         | 0,93   |
|                              | Median | 43,3      | 53,3       |        |
|                              | Q1-Q3  | 37.9-66.3 | 38.1-64.1  |        |
| SOST (pmol/L) at 2 Months    | n      | 10        | 7          | 0,088  |
|                              | Median | 38,6      | 27,9       |        |
|                              | Q1-Q3  | 34.0-49.7 | 21.5-40.7  |        |
| SOST (pmol/L) at 4 Months    | n      | 6         | 5          | 0,784  |
|                              | Median | 35        | 29,7       |        |
|                              | Q1-Q3  | 32.8-45.8 | 25.0-43.3  |        |
| SOST (pmol/L) at 6 Months    | n      | 6         | 3          | 0,519  |
|                              | Median | 28,8      | 63,1       |        |
|                              | Q1-Q3  | 22.9-48.1 | 25.5-92.9  |        |
| SOST (pmol/L) at 8 Months    | n      | 6         | 2          | 0,868  |
|                              | Median | 28        | 67,2       |        |
|                              | Q1-Q3  | 23.5-44.3 | 21.2-113.2 |        |
| SOST (pmol/L) at 10 Months   | n      | 5         | 2          | 0,846  |
|                              | Median | 36,9      | 30,4       |        |
|                              | Q1-Q3  | 21.1-64.7 | 20.2-40.5  |        |
| SOST (pmol/L) at 12 Months   | n      | 2         | 0          |        |
|                              | Median | 27,8      | .          |        |
|                              | Q1-Q3  | 20.0-35.7 | .-.        |        |
| <b>Dkk1 (pmol/L)</b>         |        |           |            |        |
| Dkk1 (pmol/L) at baseline    | n      | 14        | 10         | 0,86   |
|                              | Median | 40        | 42,1       |        |
|                              | Q1-Q3  | 31.4-52.4 | 25.1-75.9  |        |
| Dkk1 (pmol/L) at 2 Months    | n      | 10        | 7          | 0,661  |
|                              | Median | 34,1      | 42         |        |
|                              | Q1-Q3  | 26.9-58.4 | 24.4-72.2  |        |
| Dkk1 (pmol/L) at 4 Months    | n      | 6         | 5          | 0,927  |
|                              | Median | 30,7      | 46,5       |        |
|                              | Q1-Q3  | 22.8-57.5 | 18.5-58.4  |        |
| Dkk1 (pmol/L) at 6 Months    | n      | 6         | 3          | 0,699  |
|                              | Median | 36,8      | 37         |        |
|                              | Q1-Q3  | 32.0-52.4 | 9.7-49.2   |        |
| Dkk1 (pmol/L) at 8 Months    | n      | 6         | 2          | 0,868  |
|                              | Median | 29,6      | 26,8       |        |
|                              | Q1-Q3  | 19.2-34.4 | 23.8-29.7  |        |
| Dkk1 (pmol/L) at 10 Months   | n      | 5         | 2          | >0.999 |
|                              | Median | 26,1      | 23,6       |        |
|                              | Q1-Q3  | 16.3-28.7 | 8.4-38.7   |        |
| Dkk1 (pmol/L) at 12 Months   | n      | 2         | 0          |        |

|                                |                          |             |             |              |
|--------------------------------|--------------------------|-------------|-------------|--------------|
|                                | Median                   | 14,4        | .           |              |
|                                | Q1-Q3                    | 8.4-20.4    | .-.         |              |
|                                | <b>activin-A (pg/ml)</b> |             |             |              |
| activin-A (pg/ml) at baseline  | n                        | 14          | 10          | 0,501        |
|                                | Median                   | 681,1       | 551,2       |              |
|                                | Q1-Q3                    | 492.3-904.2 | 505.0-770.8 |              |
| activin-A (pg/ml) at 2 Months  | n                        | 10          | 7           | 0,961        |
|                                | Median                   | 454,8       | 488,4       |              |
|                                | Q1-Q3                    | 358.2-562.2 | 315.5-538.3 |              |
| activin-A (pg/ml) at 4 Months  | n                        | 6           | 5           | 0,648        |
|                                | Median                   | 415,6       | 519,6       |              |
|                                | Q1-Q3                    | 355.4-468.3 | 223.6-580.9 |              |
| activin-A (pg/ml) at 6 Months  | n                        | 6           | 3           | 0,699        |
|                                | Median                   | 383,5       | 372,6       |              |
|                                | Q1-Q3                    | 366.9-504.5 | 215.0-593.8 |              |
| activin-A (pg/ml) at 8 Months  | n                        | 6           | 2           | 0,617        |
|                                | Median                   | 392         | 650,8       |              |
|                                | Q1-Q3                    | 231.9-439.0 | 319.0-982.7 |              |
| activin-A (pg/ml) at 10 Months | n                        | 5           | 2           | 0,846        |
|                                | Median                   | 357,5       | 311,8       |              |
|                                | Q1-Q3                    | 283.8-362.8 | 201.0-422.7 |              |
| activin-A (pg/ml) at 12 Months | n                        | 2           | 0           |              |
|                                | Median                   | 287,5       | .           |              |
|                                | Q1-Q3                    | 256.8-318.2 | .-.         |              |
|                                | <b>CCL3 (ng/ml)</b>      |             |             |              |
| CCL3 (ng/ml) at baseline       | n                        | 14          | 10          | <b>0,024</b> |
|                                | Median                   | 85          | 61,8        |              |
|                                | Q1-Q3                    | 75.3-98.9   | 22.8-79.0   |              |
| CCL3 (ng/ml) at 2 Months       | n                        | 10          | 7           | <b>0,017</b> |
|                                | Median                   | 86,3        | 39          |              |
|                                | Q1-Q3                    | 67.4-97.0   | 10.4-71.2   |              |
| CCL3 (ng/ml) at 4 Months       | n                        | 6           | 5           | 0,648        |
|                                | Median                   | 68          | 61,3        |              |
|                                | Q1-Q3                    | 63.3-72.0   | 47.0-69.6   |              |
| CCL3 (ng/ml) at 6 Months       | n                        | 6           | 3           | 0,699        |
|                                | Median                   | 64,4        | 62,1        |              |
|                                | Q1-Q3                    | 54.0-71.1   | 61.2-74.3   |              |
| CCL3 (ng/ml) at 8 Months       | n                        | 6           | 2           | >0.999       |
|                                | Median                   | 58,1        | 44          |              |
|                                | Q1-Q3                    | 54.3-63.5   | 21.1-66.9   |              |
| CCL3 (ng/ml) at 10 Months      | n                        | 5           | 2           | 0,846        |
|                                | Median                   | 50,7        | 30,6        |              |
|                                | Q1-Q3                    | 14.2-56.0   | 3.3-57.9    |              |
| CCL3 (ng/ml) at 12 Months      | n                        | 2           | 0           |              |
|                                | Median                   | 34,1        | .           |              |
|                                | Q1-Q3                    | 3.9-64.3    | .-.         |              |

<sup>a</sup> Mann-Whitney U test











\_\_\_\_\_

Table S8. Biomarker values at each timepoint, by prior radiotherapy

| Prior radiotherapy               |        |           |           |                      |
|----------------------------------|--------|-----------|-----------|----------------------|
|                                  |        | Yes       | No        |                      |
|                                  |        | n (%)     | n (%)     | p-value <sup>a</sup> |
| bALP (µg/L)                      |        |           |           |                      |
| bALP (µg/L) at baseline          | n      | 6         | 18        | 0,334                |
|                                  | Median | 11,2      | 10,8      |                      |
|                                  | Q1-Q3  | 10.0-14.0 | 8.9-11.5  |                      |
| bALP (µg/L) at 2 Months          | n      | 4         | 13        | 0,193                |
|                                  | Median | 14,1      | 10,1      |                      |
|                                  | Q1-Q3  | 12.4-17.3 | 8.0-12.9  |                      |
| bALP (µg/L) at 4 Months          | n      | 1         | 10        | 0,874                |
|                                  | Median | 11,3      | 11,7      |                      |
|                                  | Q1-Q3  | 11.3-11.3 | 9.1-14.1  |                      |
| bALP (µg/L) at 6 Months          | n      | 1         | 8         | >0.999               |
|                                  | Median | 13,6      | 12,7      |                      |
|                                  | Q1-Q3  | 13.6-13.6 | 7.6-14.8  |                      |
| bALP (µg/L) at 8 Months          | n      | 1         | 7         | >0.999               |
|                                  | Median | 15        | 16,9      |                      |
|                                  | Q1-Q3  | 15.0-15.0 | 5.6-18.0  |                      |
| bALP (µg/L) at 10 Months         | n      | 1         | 6         | >0.999               |
|                                  | Median | 15        | 12,8      |                      |
|                                  | Q1-Q3  | 15.0-15.0 | 7.0-18.1  |                      |
| bALP (µg/L) at 12 Months         | n      | 1         | 1         |                      |
|                                  | Median | 14,5      | 19,7      |                      |
|                                  | Q1-Q3  | 14.5-14.5 | 19.7-19.7 |                      |
| Osteocalcin (ng/ml)              |        |           |           |                      |
| Osteocalcin (ng/ml) at baseline  | n      | 6         | 18        | 0,571                |
|                                  | Median | 8,9       | 9,2       |                      |
|                                  | Q1-Q3  | 5.8-11.9  | 5.2-10.8  |                      |
| Osteocalcin (ng/ml) at 2 Months  | n      | 4         | 13        | 0,336                |
|                                  | Median | 7,6       | 10,9      |                      |
|                                  | Q1-Q3  | 4.6-12.2  | 9.4-14.1  |                      |
| Osteocalcin (ng/ml) at 4 Months  | n      | 1         | 10        | 0,155                |
|                                  | Median | 1         | 14,8      |                      |
|                                  | Q1-Q3  | 1.0-1.0   | 11.2-19.2 |                      |
| Osteocalcin (ng/ml) at 6 Months  | n      | 1         | 8         | 0,846                |
|                                  | Median | 16,2      | 13,4      |                      |
|                                  | Q1-Q3  | 16.2-16.2 | 10.9-22.2 |                      |
| Osteocalcin (ng/ml) at 8 Months  | n      | 1         | 7         | 0,663                |
|                                  | Median | 17,8      | 14,9      |                      |
|                                  | Q1-Q3  | 17.8-17.8 | 6.0-29.8  |                      |
| Osteocalcin (ng/ml) at 10 Months | n      | 1         | 6         | 0,803                |
|                                  | Median | 17,7      | 12,8      |                      |
|                                  | Q1-Q3  | 17.7-17.7 | 3.8-19.7  |                      |
| Osteocalcin (ng/ml) at 12 Months | n      | 1         | 1         |                      |
|                                  | Median | 20,8      | 13,3      |                      |
|                                  | Q1-Q3  | 20.8-20.8 | 13.3-13.3 |                      |
| PINP (pg/ml)                     |        |           |           |                      |
| PINP (pg/ml) at baseline         | n      | 6         | 18        | 0,334                |

|                            |        |             |             |        |
|----------------------------|--------|-------------|-------------|--------|
|                            | Median | 698,1       | 477,8       |        |
|                            | Q1-Q3  | 547.4-780.4 | 292.1-733.1 |        |
| PINP (pg/ml) at 2 Months   | n      | 4           | 13          | 0,61   |
|                            | Median | 674,5       | 384,2       |        |
|                            | Q1-Q3  | 352.2-900.0 | 226.3-710.7 |        |
| PINP (pg/ml) at 4 Months   | n      | 1           | 10          | 0,874  |
|                            | Median | 514,2       | 474,8       |        |
|                            | Q1-Q3  | 514.2-514.2 | 411.6-777.5 |        |
| PINP (pg/ml) at 6 Months   | n      | 1           | 8           | 0,561  |
|                            | Median | 789         | 441         |        |
|                            | Q1-Q3  | 789.0-789.0 | 408.7-1196  |        |
| PINP (pg/ml) at 8 Months   | n      | 1           | 7           | >0.999 |
|                            | Median | 1004        | 765,5       |        |
|                            | Q1-Q3  | 1004-1004   | 381.1-2156  |        |
| PINP (pg/ml) at 10 Months  | n      | 1           | 6           | 0,803  |
|                            | Median | 1261        | 605,5       |        |
|                            | Q1-Q3  | 1261-1261   | 447.6-2567  |        |
| PINP (pg/ml) at 12 Months  | n      | 1           | 1           |        |
|                            | Median | 1284        | 701,3       |        |
|                            | Q1-Q3  | 1284-1284   | 701.3-701.3 |        |
| <b>CTX(ng/ml)</b>          |        |             |             |        |
| CTX(ng/ml) at baseline     | n      | 6           | 18          | 0,665  |
|                            | Median | 0,7         | 0,7         |        |
|                            | Q1-Q3  | 0.7-0.8     | 0.2-1.0     |        |
| CTX(ng/ml) at 2 Months     | n      | 4           | 13          | 0,91   |
|                            | Median | 0,4         | 0,4         |        |
|                            | Q1-Q3  | 0.2-0.6     | 0.2-0.6     |        |
| CTX(ng/ml) at 4 Months     | n      | 1           | 10          | 0,635  |
|                            | Median | 0,2         | 0,3         |        |
|                            | Q1-Q3  | 0.2-0.2     | 0.2-0.5     |        |
| CTX(ng/ml) at 6 Months     | n      | 1           | 8           | 0,561  |
|                            | Median | 0,4         | 0,2         |        |
|                            | Q1-Q3  | 0.4-0.4     | 0.2-0.5     |        |
| CTX(ng/ml) at 8 Months     | n      | 1           | 7           | 0,663  |
|                            | Median | 0,3         | 0,1         |        |
|                            | Q1-Q3  | 0.3-0.3     | 0.1-0.5     |        |
| CTX(ng/ml) at 10 Months    | n      | 1           | 6           | 0,453  |
|                            | Median | 0,3         | 0,2         |        |
|                            | Q1-Q3  | 0.3-0.3     | 0.1-0.2     |        |
| CTX(ng/ml) at 12 Months    | n      | 1           | 1           |        |
|                            | Median | 0,2         | 0,4         |        |
|                            | Q1-Q3  | 0.2-0.2     | 0.4-0.4     |        |
| <b>TRACP-5B (U/L)</b>      |        |             |             |        |
| TRACP-5B (U/L) at baseline | n      | 6           | 18          | 0,443  |
|                            | Median | 3,7         | 3           |        |
|                            | Q1-Q3  | 2.2-3.7     | 1.5-4.0     |        |
| TRACP-5B (U/L) at 2 Months | n      | 4           | 13          | 0,955  |
|                            | Median | 1,9         | 1,8         |        |
|                            | Q1-Q3  | 1.3-2.0     | 1.0-2.1     |        |
| TRACP-5B (U/L) at 4 Months | n      | 1           | 10          | 0,635  |

|                             |        |         |         |        |
|-----------------------------|--------|---------|---------|--------|
| TRACP-5B (U/L) at 6 Months  | Median | 1,9     | 1,2     | 0,846  |
|                             | Q1-Q3  | 1.9-1.9 | 0.8-2.0 |        |
|                             | n      | 1       | 8       |        |
| TRACP-5B (U/L) at 8 Months  | Median | 1,7     | 1,2     | 0,663  |
|                             | Q1-Q3  | 1.7-1.7 | 1.0-1.9 |        |
|                             | n      | 1       | 7       |        |
| TRACP-5B (U/L) at 10 Months | Median | 0,9     | 1       | 0,724  |
|                             | Q1-Q3  | 0.9-0.9 | 0.8-1.1 |        |
|                             | n      | 1       | 4       |        |
| TRACP-5B (U/L) at 12 Months | Median | 0,9     | 0,9     |        |
|                             | Q1-Q3  | 0.9-0.9 | 0.8-1.4 |        |
|                             | n      | 1       | 1       |        |
| <b>RANKL (pmol/L)</b>       |        |         |         |        |
| RANKL (pmol/L) at baseline  | n      | 6       | 18      | 0,062  |
|                             | Median | 0,4     | 0,2     |        |
|                             | Q1-Q3  | 0.2-0.5 | 0.1-0.4 |        |
| RANKL (pmol/L) at 2 Months  | n      | 4       | 13      | 0,955  |
|                             | Median | 0,2     | 0,2     |        |
|                             | Q1-Q3  | 0.1-0.2 | 0.1-0.2 |        |
| RANKL (pmol/L) at 4 Months  | n      | 1       | 10      | 0,429  |
|                             | Median | 0,1     | 0,1     |        |
|                             | Q1-Q3  | 0.1-0.1 | 0.1-0.1 |        |
| RANKL (pmol/L) at 6 Months  | n      | 1       | 8       | >0.999 |
|                             | Median | 0,1     | 0,1     |        |
|                             | Q1-Q3  | 0.1-0.1 | 0.1-0.1 |        |
| RANKL (pmol/L) at 8 Months  | n      | 1       | 7       | >0.999 |
|                             | Median | 0,1     | 0,1     |        |
|                             | Q1-Q3  | 0.1-0.1 | 0.0-0.1 |        |
| RANKL (pmol/L) at 10 Months | n      | 1       | 6       | >0.999 |
|                             | Median | 0,1     | 0,1     |        |
|                             | Q1-Q3  | 0.1-0.1 | 0.0-0.2 |        |
| RANKL (pmol/L) at 12 Months | n      | 1       | 1       |        |
|                             | Median | 0,1     | 0,2     |        |
|                             | Q1-Q3  | 0.1-0.1 | 0.2-0.2 |        |
| <b>RANKL/OPG ratio</b>      |        |         |         |        |
| RANKL/OPG ratio at baseline | n      | 6       | 18      | 0,117  |
|                             | Median | 0,1     | 0,1     |        |
|                             | Q1-Q3  | 0.1-0.1 | 0.0-0.1 |        |
| RANKL/OPG ratio at 2 Months | n      | 4       | 13      | 0,61   |
|                             | Median | 0       | 0       |        |
|                             | Q1-Q3  | 0.0-0.0 | 0.0-0.0 |        |
| RANKL/OPG ratio at 4 Months | n      | 1       | 10      | 0,635  |
|                             | Median | 0       | 0       |        |
|                             | Q1-Q3  | 0.0-0.0 | 0.0-0.0 |        |
| RANKL/OPG ratio at 6 Months | n      | 1       | 8       | 0,561  |
|                             | Median | 0       | 0       |        |
|                             | Q1-Q3  | 0.0-0.0 | 0.0-0.0 |        |
| RANKL/OPG ratio at 8 Months | n      | 1       | 7       | 0,663  |

|                              |                      |           |           |        |
|------------------------------|----------------------|-----------|-----------|--------|
|                              | Median               | 0         | 0         |        |
|                              | Q1-Q3                | 0.0-0.0   | 0.0-0.0   |        |
| RANKL/OPG ratio at 10 Months | n                    | 1         | 6         | 0,803  |
|                              | Median               | 0         | 0         |        |
|                              | Q1-Q3                | 0.0-0.0   | 0.0-0.0   |        |
| RANKL/OPG ratio at 12 Months | n                    | 1         | 1         |        |
|                              | Median               | 0         | 0         |        |
|                              | Q1-Q3                | 0.0-0.0   | 0.0-0.0   |        |
|                              | <b>SOST (pmol/L)</b> |           |           |        |
| SOST (pmol/L) at baseline    | n                    | 6         | 18        | 0,571  |
|                              | Median               | 54,5      | 46        |        |
|                              | Q1-Q3                | 41.4-64.6 | 37.7-66.3 |        |
| SOST (pmol/L) at 2 Months    | n                    | 4         | 13        | 0,955  |
|                              | Median               | 36,1      | 37,2      |        |
|                              | Q1-Q3                | 28.0-61.8 | 29.4-41.7 |        |
| SOST (pmol/L) at 4 Months    | n                    | 1         | 10        | 0,635  |
|                              | Median               | 43,3      | 33        |        |
|                              | Q1-Q3                | 43.3-43.3 | 25.0-45.8 |        |
| SOST (pmol/L) at 6 Months    | n                    | 1         | 8         | >0.999 |
|                              | Median               | 31,8      | 37        |        |
|                              | Q1-Q3                | 31.8-31.8 | 24.2-78.0 |        |
| SOST (pmol/L) at 8 Months    | n                    | 1         | 7         | 0,663  |
|                              | Median               | 23,5      | 29,9      |        |
|                              | Q1-Q3                | 23.5-23.5 | 21.2-63.5 |        |
| SOST (pmol/L) at 10 Months   | n                    | 1         | 6         | 0,803  |
|                              | Median               | 21,1      | 38,7      |        |
|                              | Q1-Q3                | 21.1-21.1 | 20.2-64.7 |        |
| SOST (pmol/L) at 12 Months   | n                    | 1         | 1         |        |
|                              | Median               | 20        | 35,7      |        |
|                              | Q1-Q3                | 20.0-20.0 | 35.7-35.7 |        |
|                              | <b>Dkk1 (pmol/L)</b> |           |           |        |
| Dkk1 (pmol/L) at baseline    | n                    | 6         | 18        | >0.999 |
|                              | Median               | 42,1      | 40        |        |
|                              | Q1-Q3                | 37.5-50.9 | 21.2-75.9 |        |
| Dkk1 (pmol/L) at 2 Months    | n                    | 4         | 13        | 0,955  |
|                              | Median               | 44,7      | 36,9      |        |
|                              | Q1-Q3                | 25.6-67.3 | 28.7-58.4 |        |
| Dkk1 (pmol/L) at 4 Months    | n                    | 1         | 10        | 0,429  |
|                              | Median               | 58,4      | 30,7      |        |
|                              | Q1-Q3                | 58.4-58.4 | 18.5-57.5 |        |
| Dkk1 (pmol/L) at 6 Months    | n                    | 1         | 8         | 0,333  |
|                              | Median               | 21,2      | 38,3      |        |
|                              | Q1-Q3                | 21.2-21.2 | 33.0-50.8 |        |
| Dkk1 (pmol/L) at 8 Months    | n                    | 1         | 7         | 0,383  |
|                              | Median               | 19,2      | 29,7      |        |
|                              | Q1-Q3                | 19.2-19.2 | 23.8-34.4 |        |
| Dkk1 (pmol/L) at 10 Months   | n                    | 1         | 6         | 0,453  |
|                              | Median               | 9,1       | 27,4      |        |
|                              | Q1-Q3                | 9.1-9.1   | 16.3-31.0 |        |
| Dkk1 (pmol/L) at 12 Months   | n                    | 1         | 1         |        |



|                                |                          |             |             |       |
|--------------------------------|--------------------------|-------------|-------------|-------|
|                                | Median                   | 8,4         | 20,4        |       |
|                                | Q1-Q3                    | 8.4-8.4     | 20.4-20.4   |       |
|                                | <b>activin-A (pg/ml)</b> |             |             |       |
| activin-A (pg/ml) at baseline  | n                        | 6           | 18          | 0,868 |
|                                | Median                   | 692,8       | 652         |       |
|                                | Q1-Q3                    | 421.1-921.2 | 505.0-902.7 |       |
| activin-A (pg/ml) at 2 Months  | n                        | 4           | 13          | 0,126 |
|                                | Median                   | 540         | 436,9       |       |
|                                | Q1-Q3                    | 482.6-674.5 | 321.0-488.4 |       |
| activin-A (pg/ml) at 4 Months  | n                        | 1           | 10          | 0,268 |
|                                | Median                   | 580,9       | 415,6       |       |
|                                | Q1-Q3                    | 580.9-580.9 | 334.5-492.5 |       |
| activin-A (pg/ml) at 6 Months  | n                        | 1           | 8           | 0,333 |
|                                | Median                   | 300         | 383,5       |       |
|                                | Q1-Q3                    | 300.0-300.0 | 369.7-549.1 |       |
| activin-A (pg/ml) at 8 Months  | n                        | 1           | 7           | 0,19  |
|                                | Median                   | 213,5       | 418,4       |       |
|                                | Q1-Q3                    | 213.5-213.5 | 319.0-537.9 |       |
| activin-A (pg/ml) at 10 Months | n                        | 1           | 6           | 0,803 |
|                                | Median                   | 362,8       | 320,7       |       |
|                                | Q1-Q3                    | 362.8-362.8 | 280.5-422.7 |       |
| activin-A (pg/ml) at 12 Months | n                        | 1           | 1           |       |
|                                | Median                   | 256,8       | 318,2       |       |
|                                | Q1-Q3                    | 256.8-256.8 | 318.2-318.2 |       |
|                                | <b>CCL3 (ng/ml)</b>      |             |             |       |
| CCL3 (ng/ml) at baseline       | n                        | 6           | 18          | 0,102 |
|                                | Median                   | 49,7        | 80,8        |       |
|                                | Q1-Q3                    | 3.1-79.0    | 70.9-98.9   |       |
| CCL3 (ng/ml) at 2 Months       | n                        | 4           | 13          | 0,126 |
|                                | Median                   | 28,4        | 71,2        |       |
|                                | Q1-Q3                    | 7.5-64.4    | 61.2-95.5   |       |
| CCL3 (ng/ml) at 4 Months       | n                        | 1           | 10          | 0,155 |
|                                | Median                   | 32,8        | 68          |       |
|                                | Q1-Q3                    | 32.8-32.8   | 61.3-72.0   |       |
| CCL3 (ng/ml) at 6 Months       | n                        | 1           | 8           | 0,846 |
|                                | Median                   | 67,4        | 61,7        |       |
|                                | Q1-Q3                    | 67.4-67.4   | 57.6-72.1   |       |
| CCL3 (ng/ml) at 8 Months       | n                        | 1           | 7           | 0,663 |
|                                | Median                   | 54,3        | 61,1        |       |
|                                | Q1-Q3                    | 54.3-54.3   | 21.1-66.9   |       |
| CCL3 (ng/ml) at 10 Months      | n                        | 1           | 6           | 0,211 |
|                                | Median                   | 60,8        | 32,4        |       |
|                                | Q1-Q3                    | 60.8-60.8   | 9.1-56.0    |       |
| CCL3 (ng/ml) at 12 Months      | n                        | 1           | 1           |       |
|                                | Median                   | 64,3        | 3,9         |       |
|                                | Q1-Q3                    | 64.3-64.3   | 3.9-3.9     |       |

<sup>a</sup> Mann-Whitney U test









\_\_\_\_\_

Table S9. Biomarker values at each timepoint, by refractoriness to PI

|                                  |         | Refractoriness to PI |           |                      |
|----------------------------------|---------|----------------------|-----------|----------------------|
|                                  |         | Yes                  | No        |                      |
|                                  |         | n (%)                | n (%)     | p-value <sup>a</sup> |
| <b>bALP (µg/L)</b>               |         |                      |           |                      |
| bALP (µg/L) at baseline          | n       | 10                   | 14        | 0,429                |
|                                  | Median  | 11,5                 | 10,6      |                      |
|                                  | Q25-Q75 | 9.3-11.7             | 8.9-11.3  |                      |
| bALP (µg/L) at 2 Months          | n       | 8                    | 9         | 0,81                 |
|                                  | Median  | 12,4                 | 11,7      |                      |
|                                  | Q25-Q75 | 8.6-18.3             | 9.1-12.9  |                      |
| bALP (µg/L) at 4 Months          | n       | 5                    | 6         | 0,121                |
|                                  | Median  | 10,8                 | 13,5      |                      |
|                                  | Q25-Q75 | 9.1-11.3             | 11.6-14.4 |                      |
| bALP (µg/L) at 6 Months          | n       | 5                    | 4         | 0,27                 |
|                                  | Median  | 11,6                 | 14,3      |                      |
|                                  | Q25-Q75 | 8.1-13.6             | 10.4-17.3 |                      |
| bALP (µg/L) at 8 Months          | n       | 4                    | 4         | 0,112                |
|                                  | Median  | 10,3                 | 17,4      |                      |
|                                  | Q25-Q75 | 4.7-16.0             | 11.9-18.8 |                      |
| bALP (µg/L) at 10 Months         | n       | 4                    | 3         | 0,216                |
|                                  | Median  | 11                   | 18,1      |                      |
|                                  | Q25-Q75 | 6.4-15.4             | 9.8-20.0  |                      |
| bALP (µg/L) at 12 Months         | n       | 2                    | 0         |                      |
|                                  | Median  | 17,1                 | .         |                      |
|                                  | Q25-Q75 | 14.5-19.7            | .-.       |                      |
| <b>Osteocalcin (ng/ml)</b>       |         |                      |           |                      |
| Osteocalcin (ng/ml) at baseline  | n       | 10                   | 14        | 0,279                |
|                                  | Median  | 7,9                  | 9,5       |                      |
|                                  | Q25-Q75 | 3.9-10.8             | 5.8-11.9  |                      |
| Osteocalcin (ng/ml) at 2 Months  | n       | 8                    | 9         | 0,163                |
|                                  | Median  | 8,1                  | 12,2      |                      |
|                                  | Q25-Q75 | 2.8-12.9             | 9.4-14.1  |                      |
| Osteocalcin (ng/ml) at 4 Months  | n       | 5                    | 6         | 0,648                |
|                                  | Median  | 12,4                 | 15        |                      |
|                                  | Q25-Q75 | 9.9-17.2             | 11.2-19.2 |                      |
| Osteocalcin (ng/ml) at 6 Months  | n       | 5                    | 4         | 0,391                |
|                                  | Median  | 12,8                 | 19,7      |                      |
|                                  | Q25-Q75 | 11.1-16.2            | 12.4-26.1 |                      |
| Osteocalcin (ng/ml) at 8 Months  | n       | 4                    | 4         | 0,47                 |
|                                  | Median  | 11,7                 | 23,3      |                      |
|                                  | Q25-Q75 | 7.3-16.4             | 11.2-34.9 |                      |
| Osteocalcin (ng/ml) at 10 Months | n       | 4                    | 3         | 0,216                |
|                                  | Median  | 10,3                 | 19,7      |                      |
|                                  | Q25-Q75 | 3.3-17.2             | 8.9-28.2  |                      |
| Osteocalcin (ng/ml) at 12 Months | n       | 2                    | 0         |                      |
|                                  | Median  | 17,1                 | .         |                      |
|                                  | Q25-Q75 | 13.3-20.8            | .-.       |                      |
| <b>PINP (pg/ml)</b>              |         |                      |           |                      |
| PINP (pg/ml) at baseline         | n       | 10                   | 14        | 0,747                |

|                            |                       |             |             |       |
|----------------------------|-----------------------|-------------|-------------|-------|
|                            | Median                | 560,1       | 477,8       |       |
|                            | Q25-Q75               | 310.5-654.2 | 253.1-750.7 |       |
| PINP (pg/ml) at 2 Months   | n                     | 8           | 9           | 0,885 |
|                            | Median                | 640         | 384,2       |       |
|                            | Q25-Q75               | 196.9-777.4 | 229.5-550.8 |       |
| PINP (pg/ml) at 4 Months   | n                     | 5           | 6           | 0,523 |
|                            | Median                | 490,2       | 530,4       |       |
|                            | Q25-Q75               | 411.6-514.2 | 439.2-1567  |       |
| PINP (pg/ml) at 6 Months   | n                     | 5           | 4           | 0,27  |
|                            | Median                | 439,3       | 1068        |       |
|                            | Q25-Q75               | 397.8-698.7 | 431.2-1875  |       |
| PINP (pg/ml) at 8 Months   | n                     | 4           | 4           | 0,112 |
|                            | Median                | 573,3       | 2072        |       |
|                            | Q25-Q75               | 290.0-884.9 | 1265-2831   |       |
| PINP (pg/ml) at 10 Months  | n                     | 4           | 3           | 0,216 |
|                            | Median                | 549,8       | 2567        |       |
|                            | Q25-Q75               | 391.7-956.6 | 559.0-3650  |       |
| PINP (pg/ml) at 12 Months  | n                     | 2           | 0           |       |
|                            | Median                | 992,5       | .           |       |
|                            | Q25-Q75               | 701.3-1284  | .-.         |       |
|                            | <b>CTX(ng/ml)</b>     |             |             |       |
| CTX(ng/ml) at baseline     | n                     | 10          | 14          | 0,703 |
|                            | Median                | 0,6         | 0,8         |       |
|                            | Q25-Q75               | 0.2-0.9     | 0.3-1.0     |       |
| CTX(ng/ml) at 2 Months     | n                     | 8           | 9           | 0,386 |
|                            | Median                | 0,4         | 0,5         |       |
|                            | Q25-Q75               | 0.1-0.6     | 0.2-0.6     |       |
| CTX(ng/ml) at 4 Months     | n                     | 5           | 6           | 0,235 |
|                            | Median                | 0,2         | 0,3         |       |
|                            | Q25-Q75               | 0.2-0.3     | 0.3-0.5     |       |
| CTX(ng/ml) at 6 Months     | n                     | 5           | 4           | 0,903 |
|                            | Median                | 0,2         | 0,2         |       |
|                            | Q25-Q75               | 0.2-0.4     | 0.2-0.5     |       |
| CTX(ng/ml) at 8 Months     | n                     | 4           | 4           | 0,665 |
|                            | Median                | 0,2         | 0,1         |       |
|                            | Q25-Q75               | 0.1-0.4     | 0.1-0.3     |       |
| CTX(ng/ml) at 10 Months    | n                     | 4           | 3           | 0,377 |
|                            | Median                | 0,3         | 0,1         |       |
|                            | Q25-Q75               | 0.1-0.4     | 0.1-0.2     |       |
| CTX(ng/ml) at 12 Months    | n                     | 2           | 0           |       |
|                            | Median                | 0,3         | .           |       |
|                            | Q25-Q75               | 0.2-0.4     | .-.         |       |
|                            | <b>TRACP-5B (U/L)</b> |             |             |       |
| TRACP-5B (U/L) at baseline | n                     | 10          | 14          | 0,792 |
|                            | Median                | 2,4         | 3,6         |       |
|                            | Q25-Q75               | 1.8-3.7     | 1.3-4.0     |       |
| TRACP-5B (U/L) at 2 Months | n                     | 8           | 9           | 0,665 |
|                            | Median                | 1,9         | 1,7         |       |
|                            | Q25-Q75               | 1.8-2.0     | 0.8-2.4     |       |
| TRACP-5B (U/L) at 4 Months | n                     | 5           | 6           | 0,927 |



|                             |                 |         |         |       |
|-----------------------------|-----------------|---------|---------|-------|
| TRACP-5B (U/L) at 6 Months  | Median          | 1,3     | 1,2     | 0,54  |
|                             | Q25-Q75         | 0.8-1.9 | 1.0-2.1 |       |
|                             | n               | 5       | 4       |       |
|                             | Median          | 1,7     | 1,1     |       |
| TRACP-5B (U/L) at 8 Months  | Q25-Q75         | 1.3-1.9 | 1.0-1.5 | 0,885 |
|                             | n               | 4       | 4       |       |
|                             | Median          | 1       | 1       |       |
|                             | Q25-Q75         | 0.8-1.6 | 0.9-1.0 |       |
| TRACP-5B (U/L) at 10 Months | n               | 3       | 2       | 0,773 |
|                             | Median          | 0,9     | 0,9     |       |
|                             | Q25-Q75         | 0.8-2.0 | 0.9-0.9 |       |
|                             | n               | 2       | 0       |       |
| TRACP-5B (U/L) at 12 Months | Median          | 1,3     | .       |       |
|                             | Q25-Q75         | 0.9-1.8 | .-.     |       |
|                             | RANKL (pmol/L)  |         |         |       |
|                             | n               | 10      | 14      |       |
| RANKL (pmol/L) at baseline  | Median          | 0,2     | 0,3     | 0,815 |
|                             | Q25-Q75         | 0.1-0.5 | 0.2-0.4 |       |
|                             | n               | 8       | 9       |       |
|                             | Median          | 0,2     | 0,2     |       |
| RANKL (pmol/L) at 2 Months  | Q25-Q75         | 0.1-0.2 | 0.2-0.2 | 0,962 |
|                             | n               | 5       | 6       |       |
|                             | Median          | 0,1     | 0,1     |       |
|                             | Q25-Q75         | 0.1-0.1 | 0.1-0.1 |       |
| RANKL (pmol/L) at 4 Months  | n               | 5       | 4       | 0,903 |
|                             | Median          | 0,1     | 0,1     |       |
|                             | Q25-Q75         | 0.1-0.1 | 0.1-0.1 |       |
|                             | n               | 4       | 3       |       |
| RANKL (pmol/L) at 6 Months  | Median          | 0,1     | 0       | 0,052 |
|                             | Q25-Q75         | 0.1-0.2 | 0.0-0.1 |       |
|                             | n               | 2       | 0       |       |
|                             | Median          | 0,1     | .       |       |
| RANKL (pmol/L) at 8 Months  | Q25-Q75         | 0.1-0.2 | .-.     |       |
|                             | RANKL/OPG ratio |         |         |       |
|                             | n               | 10      | 14      |       |
|                             | Median          | 0,1     | 0,1     |       |
| RANKL/OPG ratio at baseline | Q25-Q75         | 0.0-0.1 | 0.0-0.1 | 0,962 |
|                             | n               | 8       | 9       |       |
|                             | Median          | 0       | 0       |       |
|                             | Q25-Q75         | 0.0-0.1 | 0.0-0.0 |       |
| RANKL/OPG ratio at 2 Months | n               | 5       | 6       | 0,121 |
|                             | Median          | 0       | 0       |       |
|                             | Q25-Q75         | 0.0-0.0 | 0.0-0.0 |       |
|                             | n               | 5       | 4       |       |
| RANKL/OPG ratio at 4 Months | Median          | 0       | 0       | 0,713 |
|                             | Q25-Q75         | 0.0-0.0 | 0.0-0.0 |       |
|                             | n               | 4       | 4       |       |
|                             | Median          | 0       | 0       |       |
| RANKL/OPG ratio at 6 Months | Q25-Q75         | 0.0-0.0 | 0.0-0.0 | 0,112 |
|                             | n               | 4       | 4       |       |
|                             | Median          | 0       | 0       |       |
|                             | Q25-Q75         | 0.0-0.0 | 0.0-0.0 |       |
| RANKL/OPG ratio at 8 Months | n               | 4       | 4       |       |
|                             | Median          | 0       | 0       |       |
|                             | Q25-Q75         | 0.0-0.0 | 0.0-0.0 |       |
|                             | n               | 4       | 4       |       |

|                              |         |           |           |        |
|------------------------------|---------|-----------|-----------|--------|
|                              | Median  | 0         | 0         |        |
|                              | Q25-Q75 | 0.0-0.0   | 0.0-0.0   |        |
| RANKL/OPG ratio at 10 Months | n       | 4         | 3         | 0,216  |
|                              | Median  | 0         | 0         |        |
|                              | Q25-Q75 | 0.0-0.0   | 0.0-0.0   |        |
| RANKL/OPG ratio at 12 Months | n       | 2         | 0         |        |
|                              | Median  | 0         | .         |        |
|                              | Q25-Q75 | 0.0-0.0   | .-.       |        |
| <b>SOST (pmol/L)</b>         |         |           |           |        |
| SOST (pmol/L) at baseline    | n       | 10        | 14        | 0,578  |
|                              | Median  | 47,6      | 48,8      |        |
|                              | Q25-Q75 | 39.4-66.3 | 37.7-64.1 |        |
| SOST (pmol/L) at 2 Months    | n       | 8         | 9         | 0,665  |
|                              | Median  | 36,1      | 37,2      |        |
|                              | Q25-Q75 | 27.9-40.4 | 29.4-48.3 |        |
| SOST (pmol/L) at 4 Months    | n       | 5         | 6         | 0,171  |
|                              | Median  | 43,3      | 28,9      |        |
|                              | Q25-Q75 | 33.2-45.8 | 22.8-36.7 |        |
| SOST (pmol/L) at 6 Months    | n       | 5         | 4         | 0,54   |
|                              | Median  | 48,1      | 25,6      |        |
|                              | Q25-Q75 | 31.8-63.1 | 23.5-87.7 |        |
| SOST (pmol/L) at 8 Months    | n       | 4         | 4         | 0,312  |
|                              | Median  | 37,1      | 23,7      |        |
|                              | Q25-Q75 | 26.7-78.7 | 20.8-44.8 |        |
| SOST (pmol/L) at 10 Months   | n       | 4         | 3         | 0,596  |
|                              | Median  | 38,7      | 20,2      |        |
|                              | Q25-Q75 | 29.0-52.6 | 19.3-82.1 |        |
| SOST (pmol/L) at 12 Months   | n       | 2         | 0         |        |
|                              | Median  | 27,8      | .         |        |
|                              | Q25-Q75 | 20.0-35.7 | .-.       |        |
| <b>Dkk1 (pmol/L)</b>         |         |           |           |        |
| Dkk1 (pmol/L) at baseline    | n       | 10        | 14        | 0,229  |
|                              | Median  | 47,7      | 37,7      |        |
|                              | Q25-Q75 | 32.0-76.6 | 25.1-50.9 |        |
| Dkk1 (pmol/L) at 2 Months    | n       | 8         | 9         | 0,413  |
|                              | Median  | 58,9      | 31,4      |        |
|                              | Q25-Q75 | 26.5-69.8 | 26.9-42.0 |        |
| Dkk1 (pmol/L) at 4 Months    | n       | 5         | 6         | 0,648  |
|                              | Median  | 57,5      | 30,7      |        |
|                              | Q25-Q75 | 18.5-58.4 | 22.8-46.5 |        |
| Dkk1 (pmol/L) at 6 Months    | n       | 5         | 4         | >0.999 |
|                              | Median  | 37        | 36,8      |        |
|                              | Q25-Q75 | 21.2-52.4 | 33.0-44.4 |        |
| Dkk1 (pmol/L) at 8 Months    | n       | 4         | 4         | 0,885  |
|                              | Median  | 26        | 30,4      |        |
|                              | Q25-Q75 | 21.5-39.7 | 17.8-32.7 |        |
| Dkk1 (pmol/L) at 10 Months   | n       | 4         | 3         | 0,216  |
|                              | Median  | 17,6      | 31        |        |
|                              | Q25-Q75 | 8.8-27.4  | 16.3-38.7 |        |
| Dkk1 (pmol/L) at 12 Months   | n       | 2         | 0         |        |

|                                |                          |             |             |       |
|--------------------------------|--------------------------|-------------|-------------|-------|
|                                | Median                   | 14,4        | .           |       |
|                                | Q25-Q75                  | 8.4-20.4    | .-.         |       |
|                                | <b>activin-A (pg/ml)</b> |             |             |       |
| activin-A (pg/ml) at baseline  | n                        | 10          | 14          | 0,429 |
|                                | Median                   | 719,4       | 595,1       |       |
|                                | Q25-Q75                  | 505.0-904.2 | 421.1-745.2 |       |
| activin-A (pg/ml) at 2 Months  | n                        | 8           | 9           | 0,136 |
|                                | Median                   | 413,6       | 488,4       |       |
|                                | Q25-Q75                  | 300.5-482.6 | 462.2-562.2 |       |
| activin-A (pg/ml) at 4 Months  | n                        | 5           | 6           | 0,055 |
|                                | Median                   | 519,6       | 344,9       |       |
|                                | Q25-Q75                  | 418.7-580.9 | 223.6-468.3 |       |
| activin-A (pg/ml) at 6 Months  | n                        | 5           | 4           | 0,391 |
|                                | Median                   | 388,3       | 372,8       |       |
|                                | Q25-Q75                  | 372.6-593.8 | 290.9-441.6 |       |
| activin-A (pg/ml) at 8 Months  | n                        | 4           | 4           | 0,885 |
|                                | Median                   | 402,3       | 368,7       |       |
|                                | Q25-Q75                  | 289.6-710.9 | 275.4-478.2 |       |
| activin-A (pg/ml) at 10 Months | n                        | 4           | 3           | 0,86  |
|                                | Median                   | 360,2       | 283,8       |       |
|                                | Q25-Q75                  | 319.0-392.7 | 201.0-467.5 |       |
| activin-A (pg/ml) at 12 Months | n                        | 2           | 0           |       |
|                                | Median                   | 287,5       | .           |       |
|                                | Q25-Q75                  | 256.8-318.2 | .-.         |       |
|                                | <b>CCL3 (ng/ml)</b>      |             |             |       |
| CCL3 (ng/ml) at baseline       | n                        | 10          | 14          | 0,501 |
|                                | Median                   | 73,9        | 80,8        |       |
|                                | Q25-Q75                  | 22.8-94.8   | 70.9-88.5   |       |
| CCL3 (ng/ml) at 2 Months       | n                        | 8           | 9           | 0,312 |
|                                | Median                   | 52,6        | 71,2        |       |
|                                | Q25-Q75                  | 10.7-90.1   | 67.4-89.4   |       |
| CCL3 (ng/ml) at 4 Months       | n                        | 5           | 6           | 0,648 |
|                                | Median                   | 47          | 68          |       |
|                                | Q25-Q75                  | 34.3-82.9   | 63.3-69.6   |       |
| CCL3 (ng/ml) at 6 Months       | n                        | 5           | 4           | 0,903 |
|                                | Median                   | 67,4        | 61,7        |       |
|                                | Q25-Q75                  | 61.2-71.1   | 57.6-67.6   |       |
| CCL3 (ng/ml) at 8 Months       | n                        | 4           | 4           | 0,112 |
|                                | Median                   | 37,7        | 64          |       |
|                                | Q25-Q75                  | 14.9-58.9   | 58.1-77.9   |       |
| CCL3 (ng/ml) at 10 Months      | n                        | 4           | 3           | 0,86  |
|                                | Median                   | 32,5        | 50,7        |       |
|                                | Q25-Q75                  | 6.2-58.4    | 14.2-57.9   |       |
| CCL3 (ng/ml) at 12 Months      | n                        | 2           | 0           |       |
|                                | Median                   | 34,1        | .           |       |
|                                | Q25-Q75                  | 3.9-64.3    | .-.         |       |

<sup>a</sup> Mann-Whitney U test









\_\_\_\_\_



Table S10. Biomarker values at each timepoint, by refractoriness to IMiD

|                                  |        | Refractoriness to IMiD |           |                      |
|----------------------------------|--------|------------------------|-----------|----------------------|
|                                  |        | Yes                    | No        |                      |
|                                  |        | n (%)                  | n (%)     | p-value <sup>a</sup> |
| <b>bALP (µg/L)</b>               |        |                        |           |                      |
| bALP (µg/L) at baseline          | n      | 16                     | 8         | 0,105                |
|                                  | Median | 11,3                   | 9,5       |                      |
|                                  | Q1-Q3  | 10.4-11.7              | 8.1-11.0  |                      |
| bALP (µg/L) at 2 Months          | n      | 11                     | 6         | 0,079                |
|                                  | Median | 12,9                   | 9,6       |                      |
|                                  | Q1-Q3  | 9.4-19.1               | 8.0-11.7  |                      |
| bALP (µg/L) at 4 Months          | n      | 7                      | 4         | 0,925                |
|                                  | Median | 11,3                   | 12,2      |                      |
|                                  | Q1-Q3  | 9.1-14.1               | 9.6-13.7  |                      |
| bALP (µg/L) at 6 Months          | n      | 7                      | 2         | 0,188                |
|                                  | Median | 11,6                   | 16,7      |                      |
|                                  | Q1-Q3  | 7.1-14.8               | 13.7-19.7 |                      |
| bALP (µg/L) at 8 Months          | n      | 6                      | 2         | 0,243                |
|                                  | Median | 10,9                   | 17,4      |                      |
|                                  | Q1-Q3  | 5.6-16.9               | 16.9-18.0 |                      |
| bALP (µg/L) at 10 Months         | n      | 5                      | 2         | 0,081                |
|                                  | Median | 9,8                    | 19        |                      |
|                                  | Q1-Q3  | 7.0-15.0               | 18.1-20.0 |                      |
| bALP (µg/L) at 12 Months         | n      | 2                      | 0         |                      |
|                                  | Median | 17,1                   | .         |                      |
|                                  | Q1-Q3  | 14.5-19.7              | .-.       |                      |
| <b>Osteocalcin (ng/ml)</b>       |        |                        |           |                      |
| Osteocalcin (ng/ml) at baseline  | n      | 16                     | 8         | 0,092                |
|                                  | Median | 7,9                    | 11,6      |                      |
|                                  | Q1-Q3  | 4.6-10.4               | 7.4-14.7  |                      |
| Osteocalcin (ng/ml) at 2 Months  | n      | 11                     | 6         | 0,393                |
|                                  | Median | 10,5                   | 12,3      |                      |
|                                  | Q1-Q3  | 3.5-14.9               | 9.4-14.1  |                      |
| Osteocalcin (ng/ml) at 4 Months  | n      | 7                      | 4         | 0,777                |
|                                  | Median | 17,2                   | 11,7      |                      |
|                                  | Q1-Q3  | 9.9-19.2               | 9.9-16.0  |                      |
| Osteocalcin (ng/ml) at 6 Months  | n      | 7                      | 2         | 0,464                |
|                                  | Median | 12,8                   | 19,7      |                      |
|                                  | Q1-Q3  | 10.8-18.9              | 13.9-25.4 |                      |
| Osteocalcin (ng/ml) at 8 Months  | n      | 6                      | 2         | 0,405                |
|                                  | Median | 11,7                   | 23,3      |                      |
|                                  | Q1-Q3  | 6.0-17.8               | 16.9-29.8 |                      |
| Osteocalcin (ng/ml) at 10 Months | n      | 5                      | 2         | 0,081                |
|                                  | Median | 8,9                    | 23,9      |                      |
|                                  | Q1-Q3  | 3.8-16.8               | 19.7-28.2 |                      |
| Osteocalcin (ng/ml) at 12 Months | n      | 2                      | 0         |                      |
|                                  | Median | 17,1                   | .         |                      |
|                                  | Q1-Q3  | 13.3-20.8              | .-.       |                      |
| <b>PINP (pg/ml)</b>              |        |                        |           |                      |
| PINP (pg/ml) at baseline         | n      | 16                     | 8         | 0,343                |

|                            |        |             |             |        |
|----------------------------|--------|-------------|-------------|--------|
|                            | Median | 560,1       | 415,2       |        |
|                            | Q1-Q3  | 304.0-781.0 | 254.0-737.6 |        |
| PINP (pg/ml) at 2 Months   | n      | 11          | 6           | 0,88   |
|                            | Median | 569,4       | 384,6       |        |
|                            | Q1-Q3  | 178.9-779.6 | 333.2-550.8 |        |
| PINP (pg/ml) at 4 Months   | n      | 7           | 4           | 0,508  |
|                            | Median | 490,2       | 530,4       |        |
|                            | Q1-Q3  | 278.5-777.5 | 449.4-1249  |        |
| PINP (pg/ml) at 6 Months   | n      | 7           | 2           | 0,661  |
|                            | Median | 442,8       | 1238        |        |
|                            | Q1-Q3  | 397.8-789.0 | 419.7-2056  |        |
| PINP (pg/ml) at 8 Months   | n      | 6           | 2           | >0.999 |
|                            | Median | 884,9       | 1265        |        |
|                            | Q1-Q3  | 381.1-2156  | 541.1-1988  |        |
| PINP (pg/ml) at 10 Months  | n      | 5           | 2           | 0,846  |
|                            | Median | 652         | 1563        |        |
|                            | Q1-Q3  | 447.6-1261  | 559.0-2567  |        |
| PINP (pg/ml) at 12 Months  | n      | 2           | 0           |        |
|                            | Median | 992,5       | .           |        |
|                            | Q1-Q3  | 701.3-1284  | .-.         |        |
| <b>CTX(ng/ml)</b>          |        |             |             |        |
| CTX(ng/ml) at baseline     | n      | 16          | 8           | 0,257  |
|                            | Median | 0,6         | 0,9         |        |
|                            | Q1-Q3  | 0.2-0.9     | 0.6-1.0     |        |
| CTX(ng/ml) at 2 Months     | n      | 11          | 6           | 0,159  |
|                            | Median | 0,3         | 0,5         |        |
|                            | Q1-Q3  | 0.1-0.6     | 0.3-0.8     |        |
| CTX(ng/ml) at 4 Months     | n      | 7           | 4           | 0,073  |
|                            | Median | 0,2         | 0,4         |        |
|                            | Q1-Q3  | 0.2-0.3     | 0.3-0.6     |        |
| CTX(ng/ml) at 6 Months     | n      | 7           | 2           | 0,884  |
|                            | Median | 0,2         | 0,4         |        |
|                            | Q1-Q3  | 0.1-0.4     | 0.2-0.6     |        |
| CTX(ng/ml) at 8 Months     | n      | 6           | 2           | 0,405  |
|                            | Median | 0,1         | 0,3         |        |
|                            | Q1-Q3  | 0.1-0.3     | 0.1-0.5     |        |
| CTX(ng/ml) at 10 Months    | n      | 5           | 2           | >0.999 |
|                            | Median | 0,2         | 0,2         |        |
|                            | Q1-Q3  | 0.1-0.3     | 0.1-0.2     |        |
| CTX(ng/ml) at 12 Months    | n      | 2           | 0           |        |
|                            | Median | 0,3         | .           |        |
|                            | Q1-Q3  | 0.2-0.4     | .-.         |        |
| <b>TRACP-5B (U/L)</b>      |        |             |             |        |
| TRACP-5B (U/L) at baseline | n      | 16          | 8           | 0,188  |
|                            | Median | 2,4         | 4           |        |
|                            | Q1-Q3  | 1.7-3.7     | 2.3-5.7     |        |
| TRACP-5B (U/L) at 2 Months | n      | 11          | 6           | 0,96   |
|                            | Median | 1,9         | 1,8         |        |
|                            | Q1-Q3  | 1.0-2.1     | 0.8-2.4     |        |
| TRACP-5B (U/L) at 4 Months | n      | 7           | 4           | 0,777  |

|                             |                       |         |         |        |
|-----------------------------|-----------------------|---------|---------|--------|
| TRACP-5B (U/L) at 6 Months  | Median                | 1,3     | 1,2     | 0,306  |
|                             | Q1-Q3                 | 0.8-2.0 | 0.8-1.6 |        |
|                             | n                     | 7       | 2       |        |
| TRACP-5B (U/L) at 8 Months  | Median                | 1,7     | 1,1     | >0.999 |
|                             | Q1-Q3                 | 1.1-1.9 | 1.0-1.2 |        |
|                             | n                     | 6       | 2       |        |
| TRACP-5B (U/L) at 10 Months | Median                | 1       | 1       | 0,773  |
|                             | Q1-Q3                 | 0.8-1.1 | 1.0-1.0 |        |
|                             | n                     | 3       | 2       |        |
| TRACP-5B (U/L) at 12 Months | Median                | 0,9     | 0,9     |        |
|                             | Q1-Q3                 | 0.8-2.0 | 0.9-0.9 |        |
|                             | n                     | 2       | 0       |        |
|                             | Median                | 1,3     | .       |        |
|                             | Q1-Q3                 | 0.9-1.8 | .-.     |        |
|                             | <b>RANKL (pmol/L)</b> |         |         |        |
| RANKL (pmol/L) at baseline  | n                     | 16      | 8       | 0,342  |
|                             | Median                | 0,2     | 0,4     |        |
|                             | Q1-Q3                 | 0.1-0.4 | 0.3-0.4 |        |
| RANKL (pmol/L) at 2 Months  | n                     | 11      | 6       | 0,209  |
|                             | Median                | 0,1     | 0,2     |        |
|                             | Q1-Q3                 | 0.1-0.2 | 0.2-0.2 |        |
| RANKL (pmol/L) at 4 Months  | n                     | 7       | 4       | 0,299  |
|                             | Median                | 0,1     | 0,1     |        |
|                             | Q1-Q3                 | 0.1-0.1 | 0.1-0.1 |        |
| RANKL (pmol/L) at 6 Months  | n                     | 7       | 2       | 0,107  |
|                             | Median                | 0,1     | 0,1     |        |
|                             | Q1-Q3                 | 0.1-0.2 | 0.1-0.1 |        |
| RANKL (pmol/L) at 8 Months  | n                     | 6       | 2       | 0,067  |
|                             | Median                | 0,1     | 0       |        |
|                             | Q1-Q3                 | 0.1-0.1 | 0.0-0.0 |        |
| RANKL (pmol/L) at 10 Months | n                     | 5       | 2       | 0,081  |
|                             | Median                | 0,1     | 0       |        |
|                             | Q1-Q3                 | 0.1-0.2 | 0.0-0.0 |        |
| RANKL (pmol/L) at 12 Months | n                     | 2       | 0       |        |
|                             | Median                | 0,1     | .       |        |
|                             | Q1-Q3                 | 0.1-0.2 | .-.     |        |
| <b>RANKL/OPG ratio</b>      |                       |         |         |        |
| RANKL/OPG ratio at baseline | n                     | 16      | 8       | 0,257  |
|                             | Median                | 0,1     | 0,1     |        |
|                             | Q1-Q3                 | 0.0-0.1 | 0.1-0.1 |        |
| RANKL/OPG ratio at 2 Months | n                     | 11      | 6       | 0,393  |
|                             | Median                | 0       | 0       |        |
|                             | Q1-Q3                 | 0.0-0.0 | 0.0-0.0 |        |
| RANKL/OPG ratio at 4 Months | n                     | 7       | 4       | 0,219  |
|                             | Median                | 0       | 0       |        |
|                             | Q1-Q3                 | 0.0-0.0 | 0.0-0.0 |        |
| RANKL/OPG ratio at 6 Months | n                     | 7       | 2       | 0,057  |
|                             | Median                | 0       | 0       |        |
|                             | Q1-Q3                 | 0.0-0.0 | 0.0-0.0 |        |
| RANKL/OPG ratio at 8 Months | n                     | 6       | 2       | 0,067  |
|                             |                       |         |         |        |
|                             |                       |         |         |        |

|                              |        |           |           |              |
|------------------------------|--------|-----------|-----------|--------------|
|                              | Median | 0         | 0         |              |
|                              | Q1-Q3  | 0.0-0.0   | 0.0-0.0   |              |
| RANKL/OPG ratio at 10 Months | n      | 5         | 2         | 0,081        |
|                              | Median | 0         | 0         |              |
|                              | Q1-Q3  | 0.0-0.0   | 0.0-0.0   |              |
| RANKL/OPG ratio at 12 Months | n      | 2         | 0         |              |
|                              | Median | 0         | .         |              |
|                              | Q1-Q3  | 0.0-0.0   | .-.       |              |
| <b>SOST (pmol/L)</b>         |        |           |           |              |
| SOST (pmol/L) at baseline    | n      | 16        | 8         | 0,927        |
|                              | Median | 43,3      | 58,7      |              |
|                              | Q1-Q3  | 38.0-66.0 | 36.7-63.5 |              |
| SOST (pmol/L) at 2 Months    | n      | 11        | 6         | 0,451        |
|                              | Median | 38,2      | 33,3      |              |
|                              | Q1-Q3  | 33.8-49.7 | 27.9-41.7 |              |
| SOST (pmol/L) at 4 Months    | n      | 7         | 4         | <b>0,047</b> |
|                              | Median | 43,3      | 23,9      |              |
|                              | Q1-Q3  | 32.8-77.1 | 22.5-30.9 |              |
| SOST (pmol/L) at 6 Months    | n      | 7         | 2         | 0,107        |
|                              | Median | 48,1      | 23,5      |              |
|                              | Q1-Q3  | 25.8-92.9 | 21.6-25.5 |              |
| SOST (pmol/L) at 8 Months    | n      | 6         | 2         | 0,067        |
|                              | Median | 37,1      | 20,8      |              |
|                              | Q1-Q3  | 26.2-63.5 | 20.4-21.2 |              |
| SOST (pmol/L) at 10 Months   | n      | 5         | 2         | 0,081        |
|                              | Median | 40,5      | 19,8      |              |
|                              | Q1-Q3  | 36.9-64.7 | 19.3-20.2 |              |
| SOST (pmol/L) at 12 Months   | n      | 2         | 0         |              |
|                              | Median | 27,8      | .         |              |
|                              | Q1-Q3  | 20.0-35.7 | .-.       |              |
| <b>Dkk1 (pmol/L)</b>         |        |           |           |              |
| Dkk1 (pmol/L) at baseline    | n      | 16        | 8         | 0,168        |
|                              | Median | 44,9      | 33,4      |              |
|                              | Q1-Q3  | 34.7-74.7 | 20.7-48.3 |              |
| Dkk1 (pmol/L) at 2 Months    | n      | 11        | 6         | 0,451        |
|                              | Median | 55,3      | 30,2      |              |
|                              | Q1-Q3  | 26.9-67.5 | 24.1-42.0 |              |
| Dkk1 (pmol/L) at 4 Months    | n      | 7         | 4         | 0,777        |
|                              | Median | 33,7      | 34,7      |              |
|                              | Q1-Q3  | 18.5-58.4 | 18.7-54.7 |              |
| Dkk1 (pmol/L) at 6 Months    | n      | 7         | 2         | >0.999       |
|                              | Median | 37        | 40,6      |              |
|                              | Q1-Q3  | 21.2-52.4 | 32.0-49.2 |              |
| Dkk1 (pmol/L) at 8 Months    | n      | 6         | 2         | 0,405        |
|                              | Median | 26        | 32,1      |              |
|                              | Q1-Q3  | 19.2-31.0 | 29.7-34.4 |              |
| Dkk1 (pmol/L) at 10 Months   | n      | 5         | 2         | 0,081        |
|                              | Median | 16,3      | 34,9      |              |
|                              | Q1-Q3  | 9.1-26.1  | 31.0-38.7 |              |
| Dkk1 (pmol/L) at 12 Months   | n      | 2         | 0         |              |

|                                |                          |             |             |              |
|--------------------------------|--------------------------|-------------|-------------|--------------|
|                                | Median                   | 14,4        | .           |              |
|                                | Q1-Q3                    | 8.4-20.4    | .-.         |              |
|                                | <b>activin-A (pg/ml)</b> |             |             |              |
| activin-A (pg/ml) at baseline  | n                        | 16          | 8           | <b>0,016</b> |
|                                | Median                   | 758         | 536,6       |              |
|                                | Q1-Q3                    | 559.9-917.4 | 281.9-595.1 |              |
| activin-A (pg/ml) at 2 Months  | n                        | 11          | 6           | 0,802        |
|                                | Median                   | 447,5       | 482,9       |              |
|                                | Q1-Q3                    | 321.0-562.2 | 358.2-538.3 |              |
| activin-A (pg/ml) at 4 Months  | n                        | 7           | 4           | 0,108        |
|                                | Median                   | 468,3       | 289,5       |              |
|                                | Q1-Q3                    | 412.5-580.9 | 204.8-423.9 |              |
| activin-A (pg/ml) at 6 Months  | n                        | 7           | 2           | 0,306        |
|                                | Median                   | 388,3       | 296,9       |              |
|                                | Q1-Q3                    | 366.9-593.8 | 215.0-378.7 |              |
| activin-A (pg/ml) at 8 Months  | n                        | 6           | 2           | 0,243        |
|                                | Median                   | 428,7       | 275,4       |              |
|                                | Q1-Q3                    | 365.7-537.9 | 231.9-319.0 |              |
| activin-A (pg/ml) at 10 Months | n                        | 5           | 2           | 0,175        |
|                                | Median                   | 362,8       | 242,4       |              |
|                                | Q1-Q3                    | 357.5-422.7 | 201.0-283.8 |              |
| activin-A (pg/ml) at 12 Months | n                        | 2           | 0           |              |
|                                | Median                   | 287,5       | .           |              |
|                                | Q1-Q3                    | 256.8-318.2 | .-.         |              |
|                                | <b>CCL3 (ng/ml)</b>      |             |             |              |
| CCL3 (ng/ml) at baseline       | n                        | 16          | 8           | 0,52         |
|                                | Median                   | 75,9        | 80,4        |              |
|                                | Q1-Q3                    | 42.5-91.4   | 67.6-95.1   |              |
| CCL3 (ng/ml) at 2 Months       | n                        | 11          | 6           | 0,514        |
|                                | Median                   | 61,2        | 73,8        |              |
|                                | Q1-Q3                    | 11.1-97.0   | 70.5-89.4   |              |
| CCL3 (ng/ml) at 4 Months       | n                        | 7           | 4           | 0,777        |
|                                | Median                   | 68          | 66,4        |              |
|                                | Q1-Q3                    | 34.3-82.9   | 62.3-70.8   |              |
| CCL3 (ng/ml) at 6 Months       | n                        | 7           | 2           | 0,464        |
|                                | Median                   | 61,3        | 67,6        |              |
|                                | Q1-Q3                    | 54.0-71.1   | 62.1-73.1   |              |
| CCL3 (ng/ml) at 8 Months       | n                        | 6           | 2           | 0,067        |
|                                | Median                   | 54,7        | 77,9        |              |
|                                | Q1-Q3                    | 21.1-61.1   | 66.9-88.9   |              |
| CCL3 (ng/ml) at 10 Months      | n                        | 5           | 2           | 0,561        |
|                                | Median                   | 14,2        | 54,3        |              |
|                                | Q1-Q3                    | 9.1-56.0    | 50.7-57.9   |              |
| CCL3 (ng/ml) at 12 Months      | n                        | 2           | 0           |              |
|                                | Median                   | 34,1        | .           |              |
|                                | Q1-Q3                    | 3.9-64.3    | .-.         |              |

<sup>a</sup> Mann-Whitney U test











\_\_\_\_\_

Table S11. Biomarker values at each timepoint, by refractoriness to last line of therapy

|                                  |        | Refractoriness to last line of therapy |           |                      |
|----------------------------------|--------|----------------------------------------|-----------|----------------------|
|                                  |        | Yes                                    | No        |                      |
|                                  |        | n (%)                                  | n (%)     | p-value <sup>a</sup> |
| <b>bALP (µg/L)</b>               |        |                                        |           |                      |
| bALP (µg/L) at baseline          | n      | 13                                     | 11        | 0,385                |
|                                  | Median | 11,2                                   | 10,5      |                      |
|                                  | Q1-Q3  | 10.3-11.7                              | 8.3-11.5  |                      |
| bALP (µg/L) at 2 Months          | n      | 9                                      | 8         | 0,413                |
|                                  | Median | 12,8                                   | 10,9      |                      |
|                                  | Q1-Q3  | 9.4-17.5                               | 8.5-12.6  |                      |
| bALP (µg/L) at 4 Months          | n      | 5                                      | 6         | 0,648                |
|                                  | Median | 10,8                                   | 12,2      |                      |
|                                  | Q1-Q3  | 9.1-11.9                               | 11.3-14.1 |                      |
| bALP (µg/L) at 6 Months          | n      | 6                                      | 3         | 0,053                |
|                                  | Median | 9,8                                    | 14,8      |                      |
|                                  | Q1-Q3  | 7.1-13.6                               | 13.7-19.7 |                      |
| bALP (µg/L) at 8 Months          | n      | 5                                      | 3         | <b>0,037</b>         |
|                                  | Median | 6,8                                    | 18        |                      |
|                                  | Q1-Q3  | 5.6-15.0                               | 16.9-19.6 |                      |
| bALP (µg/L) at 10 Months         | n      | 5                                      | 2         | 0,081                |
|                                  | Median | 9,8                                    | 19        |                      |
|                                  | Q1-Q3  | 7.0-15.0                               | 18.1-20.0 |                      |
| bALP (µg/L) at 12 Months         | n      | 2                                      | 0         |                      |
|                                  | Median | 17,1                                   | .         |                      |
|                                  | Q1-Q3  | 14.5-19.7                              | .-.       |                      |
| <b>Osteocalcin (ng/ml)</b>       |        |                                        |           |                      |
| Osteocalcin (ng/ml) at baseline  | n      | 13                                     | 11        | 0,247                |
|                                  | Median | 9,1                                    | 9,9       |                      |
|                                  | Q1-Q3  | 3.9-10.8                               | 6.6-11.9  |                      |
| Osteocalcin (ng/ml) at 2 Months  | n      | 9                                      | 8         | 0,665                |
|                                  | Median | 10,5                                   | 11,4      |                      |
|                                  | Q1-Q3  | 5.8-14.9                               | 9.1-14.1  |                      |
| Osteocalcin (ng/ml) at 4 Months  | n      | 5                                      | 6         | 0,523                |
|                                  | Median | 17,2                                   | 11,7      |                      |
|                                  | Q1-Q3  | 12.4-17.7                              | 8.6-19.2  |                      |
| Osteocalcin (ng/ml) at 6 Months  | n      | 6                                      | 3         | 0,093                |
|                                  | Median | 11,9                                   | 25,4      |                      |
|                                  | Q1-Q3  | 10.8-16.2                              | 13.9-26.7 |                      |
| Osteocalcin (ng/ml) at 8 Months  | n      | 5                                      | 3         | 0,074                |
|                                  | Median | 8,5                                    | 29,8      |                      |
|                                  | Q1-Q3  | 6.0-14.9                               | 16.9-40.1 |                      |
| Osteocalcin (ng/ml) at 10 Months | n      | 5                                      | 2         | 0,081                |
|                                  | Median | 8,9                                    | 23,9      |                      |
|                                  | Q1-Q3  | 3.8-16.8                               | 19.7-28.2 |                      |
| Osteocalcin (ng/ml) at 12 Months | n      | 2                                      | 0         |                      |
|                                  | Median | 17,1                                   | .         |                      |
|                                  | Q1-Q3  | 13.3-20.8                              | .-.       |                      |
| <b>PINP (pg/ml)</b>              |        |                                        |           |                      |

|                            |        |             |             |        |
|----------------------------|--------|-------------|-------------|--------|
| PINP (pg/ml) at baseline   | n      | 13          | 11          | 0,602  |
|                            | Median | 547,4       | 467,8       |        |
|                            | Q1-Q3  | 310.5-654.2 | 215.8-750.7 |        |
| PINP (pg/ml) at 2 Months   | n      | 9           | 8           | 0,268  |
|                            | Median | 226,3       | 467,8       |        |
|                            | Q1-Q3  | 178.9-775.3 | 358.7-808.9 |        |
| PINP (pg/ml) at 4 Months   | n      | 5           | 6           | 0,121  |
|                            | Median | 411,6       | 557,8       |        |
|                            | Q1-Q3  | 278.5-490.2 | 459.5-1567  |        |
| PINP (pg/ml) at 6 Months   | n      | 6           | 3           | 0,245  |
|                            | Median | 441         | 1694        |        |
|                            | Q1-Q3  | 397.8-698.7 | 419.7-2056  |        |
| PINP (pg/ml) at 8 Months   | n      | 5           | 3           | 0,551  |
|                            | Median | 765,5       | 1988        |        |
|                            | Q1-Q3  | 381.1-1004  | 541.1-2156  |        |
| PINP (pg/ml) at 10 Months  | n      | 5           | 2           | 0,846  |
|                            | Median | 652         | 1563        |        |
|                            | Q1-Q3  | 447.6-1261  | 559.0-2567  |        |
| PINP (pg/ml) at 12 Months  | n      | 2           | 0           |        |
|                            | Median | 992,5       | .           |        |
|                            | Q1-Q3  | 701.3-1284  | .-.         |        |
| <b>CTX(ng/ml)</b>          |        |             |             |        |
| CTX(ng/ml) at baseline     | n      | 13          | 11          | 0,325  |
|                            | Median | 0,6         | 0,8         |        |
|                            | Q1-Q3  | 0.2-0.9     | 0.6-1.0     |        |
| CTX(ng/ml) at 2 Months     | n      | 9           | 8           | 0,083  |
|                            | Median | 0,2         | 0,5         |        |
|                            | Q1-Q3  | 0.1-0.5     | 0.3-0.7     |        |
| CTX(ng/ml) at 4 Months     | n      | 5           | 6           | 0,121  |
|                            | Median | 0,2         | 0,3         |        |
|                            | Q1-Q3  | 0.2-0.3     | 0.3-0.5     |        |
| CTX(ng/ml) at 6 Months     | n      | 6           | 3           | 0,699  |
|                            | Median | 0,2         | 0,3         |        |
|                            | Q1-Q3  | 0.1-0.4     | 0.2-0.6     |        |
| CTX(ng/ml) at 8 Months     | n      | 5           | 3           | 0,766  |
|                            | Median | 0,2         | 0,1         |        |
|                            | Q1-Q3  | 0.1-0.3     | 0.1-0.5     |        |
| CTX(ng/ml) at 10 Months    | n      | 5           | 2           | >0.999 |
|                            | Median | 0,2         | 0,2         |        |
|                            | Q1-Q3  | 0.1-0.3     | 0.1-0.2     |        |
| CTX(ng/ml) at 12 Months    | n      | 2           | 0           |        |
|                            | Median | 0,3         | .           |        |
|                            | Q1-Q3  | 0.2-0.4     | .-.         |        |
| <b>TRACP-5B (U/L)</b>      |        |             |             |        |
| TRACP-5B (U/L) at baseline | n      | 13          | 11          | 0,325  |
|                            | Median | 2,2         | 3,6         |        |
|                            | Q1-Q3  | 1.8-3.7     | 1.6-5.0     |        |
| TRACP-5B (U/L) at 2 Months | n      | 9           | 8           | 0,532  |
|                            | Median | 1,8         | 1,9         |        |
|                            | Q1-Q3  | 1.0-2.0     | 1.3-2.7     |        |

|                             |        |         |         |       |
|-----------------------------|--------|---------|---------|-------|
| TRACP-5B (U/L) at 4 Months  | n      | 5       | 6       | 0,411 |
|                             | Median | 1       | 1,6     |       |
|                             | Q1-Q3  | 0.8-1.3 | 1.2-2.1 |       |
| TRACP-5B (U/L) at 6 Months  | n      | 6       | 3       | 0,897 |
|                             | Median | 1,5     | 1,2     |       |
|                             | Q1-Q3  | 1.1-1.9 | 1.0-1.9 |       |
| TRACP-5B (U/L) at 8 Months  | n      | 5       | 3       | 0,766 |
|                             | Median | 0,9     | 1       |       |
|                             | Q1-Q3  | 0.8-1.1 | 1.0-1.0 |       |
| TRACP-5B (U/L) at 10 Months | n      | 3       | 2       | 0,773 |
|                             | Median | 0,9     | 0,9     |       |
|                             | Q1-Q3  | 0.8-2.0 | 0.9-0.9 |       |
| TRACP-5B (U/L) at 12 Months | n      | 2       | 0       |       |
|                             | Median | 1,3     | .       |       |
|                             | Q1-Q3  | 0.9-1.8 | .-.     |       |
| RANKL (pmol/L)              |        |         |         |       |
| RANKL (pmol/L) at baseline  | n      | 13      | 11      | 0,543 |
|                             | Median | 0,2     | 0,3     |       |
|                             | Q1-Q3  | 0.1-0.5 | 0.2-0.4 |       |
| RANKL (pmol/L) at 2 Months  | n      | 9       | 8       | 0,268 |
|                             | Median | 0,1     | 0,2     |       |
|                             | Q1-Q3  | 0.1-0.2 | 0.2-0.2 |       |
| RANKL (pmol/L) at 4 Months  | n      | 5       | 6       | 0,648 |
|                             | Median | 0,1     | 0,1     |       |
|                             | Q1-Q3  | 0.1-0.1 | 0.1-0.1 |       |
| RANKL (pmol/L) at 6 Months  | n      | 6       | 3       | 0,366 |
|                             | Median | 0,1     | 0,1     |       |
|                             | Q1-Q3  | 0.1-0.2 | 0.1-0.1 |       |
| RANKL (pmol/L) at 8 Months  | n      | 5       | 3       | 0,136 |
|                             | Median | 0,1     | 0       |       |
|                             | Q1-Q3  | 0.1-0.1 | 0.0-0.1 |       |
| RANKL (pmol/L) at 10 Months | n      | 5       | 2       | 0,081 |
|                             | Median | 0,1     | 0       |       |
|                             | Q1-Q3  | 0.1-0.2 | 0.0-0.0 |       |
| RANKL (pmol/L) at 12 Months | n      | 2       | 0       |       |
|                             | Median | 0,1     | .       |       |
|                             | Q1-Q3  | 0.1-0.2 | .-.     |       |
| RANKL/OPG ratio             |        |         |         |       |
| RANKL/OPG ratio at baseline | n      | 13      | 11      | 0,451 |
|                             | Median | 0,1     | 0,1     |       |
|                             | Q1-Q3  | 0.0-0.1 | 0.1-0.1 |       |
| RANKL/OPG ratio at 2 Months | n      | 9       | 8       | 0,597 |
|                             | Median | 0       | 0       |       |
|                             | Q1-Q3  | 0.0-0.0 | 0.0-0.0 |       |
| RANKL/OPG ratio at 4 Months | n      | 5       | 6       | 0,523 |
|                             | Median | 0       | 0       |       |
|                             | Q1-Q3  | 0.0-0.0 | 0.0-0.0 |       |
| RANKL/OPG ratio at 6 Months | n      | 6       | 3       | 0,156 |
|                             | Median | 0       | 0       |       |
|                             | Q1-Q3  | 0.0-0.0 | 0.0-0.0 |       |

|                              |        |           |           |        |
|------------------------------|--------|-----------|-----------|--------|
| RANKL/OPG ratio at 8 Months  | n      | 5         | 3         | 0,136  |
|                              | Median | 0         | 0         |        |
|                              | Q1-Q3  | 0.0-0.0   | 0.0-0.0   |        |
| RANKL/OPG ratio at 10 Months | n      | 5         | 2         | 0,081  |
|                              | Median | 0         | 0         |        |
|                              | Q1-Q3  | 0.0-0.0   | 0.0-0.0   |        |
| RANKL/OPG ratio at 12 Months | n      | 2         | 0         |        |
|                              | Median | 0         | .         |        |
|                              | Q1-Q3  | 0.0-0.0   | .-.       |        |
| SOST (pmol/L)                |        |           |           |        |
| SOST (pmol/L) at baseline    | n      | 13        | 11        | >0.999 |
|                              | Median | 44,8      | 56,2      |        |
|                              | Q1-Q3  | 38.1-66.3 | 37.9-64.1 |        |
| SOST (pmol/L) at 2 Months    | n      | 9         | 8         | 0,47   |
|                              | Median | 40,1      | 36,7      |        |
|                              | Q1-Q3  | 33.8-49.7 | 28.7-40.0 |        |
| SOST (pmol/L) at 4 Months    | n      | 5         | 6         | 0,083  |
|                              | Median | 45,8      | 28,9      |        |
|                              | Q1-Q3  | 33.2-77.1 | 22.8-36.7 |        |
| SOST (pmol/L) at 6 Months    | n      | 6         | 3         | 0,093  |
|                              | Median | 55,6      | 25,5      |        |
|                              | Q1-Q3  | 31.8-92.9 | 21.6-25.8 |        |
| SOST (pmol/L) at 8 Months    | n      | 5         | 3         | 0,074  |
|                              | Median | 44,3      | 21,2      |        |
|                              | Q1-Q3  | 29.9-63.5 | 20.4-26.2 |        |
| SOST (pmol/L) at 10 Months   | n      | 5         | 2         | 0,081  |
|                              | Median | 40,5      | 19,8      |        |
|                              | Q1-Q3  | 36.9-64.7 | 19.3-20.2 |        |
| SOST (pmol/L) at 12 Months   | n      | 2         | 0         |        |
|                              | Median | 27,8      | .         |        |
|                              | Q1-Q3  | 20.0-35.7 | .-.       |        |
| Dkk1 (pmol/L)                |        |           |           |        |
| Dkk1 (pmol/L) at baseline    | n      | 13        | 11        | 0,117  |
|                              | Median | 50,9      | 37,5      |        |
|                              | Q1-Q3  | 32.0-76.6 | 25.1-42.0 |        |
| Dkk1 (pmol/L) at 2 Months    | n      | 9         | 8         | 0,229  |
|                              | Median | 58,4      | 30,2      |        |
|                              | Q1-Q3  | 28.7-67.5 | 24.2-39.4 |        |
| Dkk1 (pmol/L) at 4 Months    | n      | 5         | 6         | >0.999 |
|                              | Median | 33,7      | 37,2      |        |
|                              | Q1-Q3  | 18.5-57.5 | 22.8-58.4 |        |
| Dkk1 (pmol/L) at 6 Months    | n      | 6         | 3         | 0,897  |
|                              | Median | 38,3      | 34        |        |
|                              | Q1-Q3  | 21.2-52.4 | 32.0-49.2 |        |
| Dkk1 (pmol/L) at 8 Months    | n      | 5         | 3         | >0.999 |
|                              | Median | 28,2      | 29,7      |        |
|                              | Q1-Q3  | 23.8-31.0 | 5.9-34.4  |        |
| Dkk1 (pmol/L) at 10 Months   | n      | 5         | 2         | 0,081  |
|                              | Median | 16,3      | 34,9      |        |
|                              | Q1-Q3  | 9.1-26.1  | 31.0-38.7 |        |

|                                |        |             |             |        |
|--------------------------------|--------|-------------|-------------|--------|
| Dkk1 (pmol/L) at 12 Months     | n      | 2           | 0           |        |
|                                | Median | 14,4        | .           |        |
|                                | Q1-Q3  | 8.4-20.4    | .-.         |        |
| <b>activin-A (pg/ml)</b>       |        |             |             |        |
| activin-A (pg/ml) at baseline  | n      | 13          | 11          | 0,354  |
|                                | Median | 694,3       | 554,1       |        |
|                                | Q1-Q3  | 505.0-904.2 | 286.2-770.8 |        |
| activin-A (pg/ml) at 2 Months  | n      | 9           | 8           | 0,597  |
|                                | Median | 436,9       | 482,9       |        |
|                                | Q1-Q3  | 321.0-562.2 | 410.2-528.0 |        |
| activin-A (pg/ml) at 4 Months  | n      | 5           | 6           | 0,171  |
|                                | Median | 468,3       | 344,9       |        |
|                                | Q1-Q3  | 418.7-519.6 | 223.6-492.5 |        |
| activin-A (pg/ml) at 6 Months  | n      | 6           | 3           | 0,699  |
|                                | Median | 380,5       | 378,7       |        |
|                                | Q1-Q3  | 366.9-593.8 | 215.0-504.5 |        |
| activin-A (pg/ml) at 8 Months  | n      | 5           | 3           | 0,766  |
|                                | Median | 418,4       | 319         |        |
|                                | Q1-Q3  | 365.7-439.0 | 231.9-537.9 |        |
| activin-A (pg/ml) at 10 Months | n      | 5           | 2           | 0,175  |
|                                | Median | 362,8       | 242,4       |        |
|                                | Q1-Q3  | 357.5-422.7 | 201.0-283.8 |        |
| activin-A (pg/ml) at 12 Months | n      | 2           | 0           |        |
|                                | Median | 287,5       | .           |        |
|                                | Q1-Q3  | 256.8-318.2 | .-.         |        |
| <b>CCL3 (ng/ml)</b>            |        |             |             |        |
| CCL3 (ng/ml) at baseline       | n      | 13          | 11          | >0,999 |
|                                | Median | 76,6        | 79          |        |
|                                | Q1-Q3  | 70.9-88.1   | 22.8-98.9   |        |
| CCL3 (ng/ml) at 2 Months       | n      | 9           | 8           | >0,999 |
|                                | Median | 61,2        | 70,8        |        |
|                                | Q1-Q3  | 44.0-97.0   | 53.2-82.9   |        |
| CCL3 (ng/ml) at 4 Months       | n      | 5           | 6           | 0,784  |
|                                | Median | 68          | 65,6        |        |
|                                | Q1-Q3  | 47.0-82.9   | 61.3-69.6   |        |
| CCL3 (ng/ml) at 6 Months       | n      | 6           | 3           | 0,699  |
|                                | Median | 64,3        | 62,1        |        |
|                                | Q1-Q3  | 54.0-71.1   | 61.3-73.1   |        |
| CCL3 (ng/ml) at 8 Months       | n      | 5           | 3           | 0,136  |
|                                | Median | 54,3        | 66,9        |        |
|                                | Q1-Q3  | 21.1-61.1   | 55.1-88.9   |        |
| CCL3 (ng/ml) at 10 Months      | n      | 5           | 2           | 0,561  |
|                                | Median | 14,2        | 54,3        |        |
|                                | Q1-Q3  | 9.1-56.0    | 50.7-57.9   |        |
| CCL3 (ng/ml) at 12 Months      | n      | 2           | 0           |        |
|                                | Median | 34,1        | .           |        |
|                                | Q1-Q3  | 3.9-64.3    | .-.         |        |

<sup>a</sup> Mann-Whitney U test













Table S12. Biomarker values at each timepoint, by prior use of bisphosphonates

| Table S12: Biomarker values at each timepoint, by prior use of bisphosphonates |        |                              |           |                      |
|--------------------------------------------------------------------------------|--------|------------------------------|-----------|----------------------|
|                                                                                |        | Prior use of bisphosphonates |           |                      |
|                                                                                |        | Yes                          | No        |                      |
|                                                                                |        | n (%)                        | n (%)     | p-value <sup>a</sup> |
| bALP (µg/L)                                                                    |        |                              |           |                      |
| bALP (µg/L) at baseline                                                        | n      | 18                           | 6         | 0,102                |
|                                                                                | Median | 10,6                         | 14,6      |                      |
|                                                                                | Q1-Q3  | 8.3-11.5                     | 10.3-21.6 |                      |
| bALP (µg/L) at 2 Months                                                        | n      | 13                           | 4         | 0,462                |
|                                                                                | Median | 11,7                         | 14,2      |                      |
|                                                                                | Q1-Q3  | 9.1-12.8                     | 10.3-17.5 |                      |
| bALP (µg/L) at 4 Months                                                        | n      | 9                            | 2         | 0,409                |
|                                                                                | Median | 11,3                         | 13        |                      |
|                                                                                | Q1-Q3  | 9.1-12.9                     | 11.9-14.1 |                      |
| bALP (µg/L) at 6 Months                                                        | n      | 7                            | 2         | 0,661                |
|                                                                                | Median | 13,6                         | 13,2      |                      |
|                                                                                | Q1-Q3  | 7.1-14.8                     | 11.6-14.8 |                      |
| bALP (µg/L) at 8 Months                                                        | n      | 7                            | 1         | 0,19                 |
|                                                                                | Median | 15                           | 19,6      |                      |
|                                                                                | Q1-Q3  | 5.6-16.9                     | 19.6-19.6 |                      |
| bALP (µg/L) at 10 Months                                                       | n      | 7                            | 0         |                      |
|                                                                                | Median | 15                           | .         |                      |
|                                                                                | Q1-Q3  | 7.0-18.1                     | .-.       |                      |
| bALP (µg/L) at 12 Months                                                       | n      | 2                            | 0         |                      |
|                                                                                | Median | 17,1                         | .         |                      |
|                                                                                | Q1-Q3  | 14.5-19.7                    | .-.       |                      |
| Osteocalcin (ng/ml)                                                            |        |                              |           |                      |
| Osteocalcin (ng/ml) at baseline                                                | n      | 18                           | 6         | 0,117                |
|                                                                                | Median | 7,4                          | 10,6      |                      |
|                                                                                | Q1-Q3  | 3.9-10.8                     | 9.1-17.6  |                      |
| Osteocalcin (ng/ml) at 2 Months                                                | n      | 13                           | 4         | 0,61                 |
|                                                                                | Median | 10,5                         | 10,8      |                      |
|                                                                                | Q1-Q3  | 8.8-14.9                     | 5.7-13.2  |                      |
| Osteocalcin (ng/ml) at 4 Months                                                | n      | 9                            | 2         | 0,126                |
|                                                                                | Median | 12,3                         | 19,3      |                      |
|                                                                                | Q1-Q3  | 9.9-17.2                     | 19.2-19.4 |                      |
| Osteocalcin (ng/ml) at 6 Months                                                | n      | 7                            | 2         | 0,107                |
|                                                                                | Median | 12,8                         | 22,8      |                      |
|                                                                                | Q1-Q3  | 10.8-16.2                    | 18.9-26.7 |                      |
| Osteocalcin (ng/ml) at 8 Months                                                | n      | 7                            | 1         | 0,19                 |
|                                                                                | Median | 14,9                         | 40,1      |                      |
|                                                                                | Q1-Q3  | 6.0-17.8                     | 40.1-40.1 |                      |
| Osteocalcin (ng/ml) at 10 Months                                               | n      | 7                            | 0         |                      |
|                                                                                | Median | 16,8                         | .         |                      |
|                                                                                | Q1-Q3  | 3.8-19.7                     | .-.       |                      |
| Osteocalcin (ng/ml) at 12 Months                                               | n      | 2                            | 0         |                      |
|                                                                                | Median | 17,1                         | .         |                      |
|                                                                                | Q1-Q3  | 13.3-20.8                    | .-.       |                      |
| PINP (pg/ml)                                                                   |        |                              |           |                      |
| PINP (pg/ml) at baseline                                                       | n      | 18                           | 6         | 0,117                |

|                            |                       |             |            |        |
|----------------------------|-----------------------|-------------|------------|--------|
|                            | Median                | 512,4       | 766,1      |        |
|                            | Q1-Q3                 | 292.1-654.2 | 362.7-1268 |        |
| PINP (pg/ml) at 2 Months   | n                     | 13          | 4          | 0,692  |
|                            | Median                | 384,2       | 580,1      |        |
|                            | Q1-Q3                 | 226.3-710.7 | 260.0-1072 |        |
| PINP (pg/ml) at 4 Months   | n                     | 9           | 2          | 0,409  |
|                            | Median                | 459,5       | 1029       |        |
|                            | Q1-Q3                 | 411.6-601.4 | 490.2-1567 |        |
| PINP (pg/ml) at 6 Months   | n                     | 7           | 2          | 0,661  |
|                            | Median                | 442,8       | 1067       |        |
|                            | Q1-Q3                 | 397.8-789.0 | 439.3-1694 |        |
| PINP (pg/ml) at 8 Months   | n                     | 7           | 1          | 0,383  |
|                            | Median                | 765,5       | 2156       |        |
|                            | Q1-Q3                 | 381.1-1988  | 2156-2156  |        |
| PINP (pg/ml) at 10 Months  | n                     | 7           | 0          |        |
|                            | Median                | 652         | .          |        |
|                            | Q1-Q3                 | 447.6-2567  | .-.        |        |
| PINP (pg/ml) at 12 Months  | n                     | 2           | 0          |        |
|                            | Median                | 992,5       | .          |        |
|                            | Q1-Q3                 | 701.3-1284  | .-.        |        |
|                            | <b>CTX(ng/ml)</b>     |             |            |        |
| CTX(ng/ml) at baseline     | n                     | 18          | 6          | 0,527  |
|                            | Median                | 0,7         | 0,7        |        |
|                            | Q1-Q3                 | 0.2-0.9     | 0.4-1.3    |        |
| CTX(ng/ml) at 2 Months     | n                     | 13          | 4          | 0,692  |
|                            | Median                | 0,5         | 0,3        |        |
|                            | Q1-Q3                 | 0.2-0.6     | 0.2-0.5    |        |
| CTX(ng/ml) at 4 Months     | n                     | 9           | 2          | 0,724  |
|                            | Median                | 0,3         | 0,3        |        |
|                            | Q1-Q3                 | 0.2-0.5     | 0.2-0.3    |        |
| CTX(ng/ml) at 6 Months     | n                     | 7           | 2          | >0.999 |
|                            | Median                | 0,2         | 0,2        |        |
|                            | Q1-Q3                 | 0.1-0.6     | 0.2-0.3    |        |
| CTX(ng/ml) at 8 Months     | n                     | 7           | 1          | 0,663  |
|                            | Median                | 0,2         | 0,1        |        |
|                            | Q1-Q3                 | 0.1-0.5     | 0.1-0.1    |        |
| CTX(ng/ml) at 10 Months    | n                     | 7           | 0          |        |
|                            | Median                | 0,2         | .          |        |
|                            | Q1-Q3                 | 0.1-0.3     | .-.        |        |
| CTX(ng/ml) at 12 Months    | n                     | 2           | 0          |        |
|                            | Median                | 0,3         | .          |        |
|                            | Q1-Q3                 | 0.2-0.4     | .-.        |        |
|                            | <b>TRACP-5B (U/L)</b> |             |            |        |
| TRACP-5B (U/L) at baseline | n                     | 18          | 6          | 0,405  |
|                            | Median                | 3,5         | 2,4        |        |
|                            | Q1-Q3                 | 1.9-4.0     | 1.2-3.7    |        |
| TRACP-5B (U/L) at 2 Months | n                     | 13          | 4          | 0,692  |
|                            | Median                | 1,9         | 1,3        |        |
|                            | Q1-Q3                 | 1.7-2.0     | 0.6-2.6    |        |
| TRACP-5B (U/L) at 4 Months | n                     | 9           | 2          | 0,195  |

|                              |                        |         |         |        |
|------------------------------|------------------------|---------|---------|--------|
| TRACP-5B (U/L) at 6 Months   | Median                 | 1,2     | 1,8     | 0,464  |
|                              | Q1-Q3                  | 0.8-1.9 | 1.3-2.2 |        |
|                              | n                      | 7       | 2       |        |
| TRACP-5B (U/L) at 8 Months   | Median                 | 1,2     | 1,6     | 0,663  |
|                              | Q1-Q3                  | 1.0-1.9 | 1.3-1.9 |        |
|                              | n                      | 7       | 1       |        |
| TRACP-5B (U/L) at 10 Months  | Median                 | 1       | 1       |        |
|                              | Q1-Q3                  | 0.8-1.1 | 1.0-1.0 |        |
|                              | n                      | 5       | 0       |        |
| TRACP-5B (U/L) at 12 Months  | Median                 | 0,9     | .       |        |
|                              | Q1-Q3                  | 0.9-0.9 | .-.     |        |
|                              | n                      | 2       | 0       |        |
| RANKL (pmol/L) at baseline   | Median                 | 1,3     | .       |        |
|                              | Q1-Q3                  | 0.9-1.8 | .-.     |        |
|                              | <b>RANKL (pmol/L)</b>  |         |         |        |
| RANKL (pmol/L) at 2 Months   | n                      | 18      | 6       | 0,571  |
|                              | Median                 | 0,3     | 0,3     |        |
|                              | Q1-Q3                  | 0.2-0.4 | 0.1-0.3 |        |
| RANKL (pmol/L) at 4 Months   | n                      | 13      | 4       | 0,692  |
|                              | Median                 | 0,2     | 0,1     |        |
|                              | Q1-Q3                  | 0.1-0.2 | 0.1-0.2 |        |
| RANKL (pmol/L) at 6 Months   | n                      | 9       | 2       | 0,906  |
|                              | Median                 | 0,1     | 0,1     |        |
|                              | Q1-Q3                  | 0.1-0.1 | 0.1-0.1 |        |
| RANKL (pmol/L) at 8 Months   | n                      | 7       | 2       | 0,884  |
|                              | Median                 | 0,1     | 0,1     |        |
|                              | Q1-Q3                  | 0.1-0.2 | 0.1-0.1 |        |
| RANKL (pmol/L) at 10 Months  | n                      | 7       | 1       | >0.999 |
|                              | Median                 | 0,1     | 0,1     |        |
|                              | Q1-Q3                  | 0.0-0.1 | 0.1-0.1 |        |
| RANKL (pmol/L) at 12 Months  | n                      | 7       | 0       |        |
|                              | Median                 | 0,1     | .       |        |
|                              | Q1-Q3                  | 0.0-0.2 | .-.     |        |
| RANKL/OPG ratio at baseline  | n                      | 2       | 0       |        |
|                              | Median                 | 0,1     | .       |        |
|                              | Q1-Q3                  | 0.1-0.2 | .-.     |        |
| RANKL/OPG ratio at 2 Months  | <b>RANKL/OPG ratio</b> |         |         | 0,617  |
|                              | n                      | 18      | 6       |        |
|                              | Median                 | 0,1     | 0,1     |        |
| RANKL/OPG ratio at 4 Months  | Q1-Q3                  | 0.0-0.1 | 0.0-0.1 | 0,865  |
|                              | n                      | 13      | 4       |        |
|                              | Median                 | 0       | 0       |        |
| RANKL/OPG ratio at 6 Months  | Q1-Q3                  | 0.0-0.0 | 0.0-0.1 | >0.999 |
|                              | n                      | 9       | 2       |        |
|                              | Median                 | 0       | 0       |        |
| RANKL/OPG ratio at 8 Months  | Q1-Q3                  | 0.0-0.0 | 0.0-0.0 | >0.999 |
|                              | n                      | 7       | 2       |        |
|                              | Median                 | 0       | 0       |        |
| RANKL/OPG ratio at 12 Months | Q1-Q3                  | 0.0-0.0 | 0.0-0.0 | >0.999 |
|                              | n                      | 7       | 1       |        |
|                              | Median                 | 0       | 0       |        |

|                              |        |           |           |        |
|------------------------------|--------|-----------|-----------|--------|
|                              | Median | 0         | 0         |        |
|                              | Q1-Q3  | 0.0-0.0   | 0.0-0.0   |        |
| RANKL/OPG ratio at 10 Months | n      | 7         | 0         |        |
|                              | Median | 0         | .         |        |
|                              | Q1-Q3  | 0.0-0.0   | .-.       |        |
| RANKL/OPG ratio at 12 Months | n      | 2         | 0         |        |
|                              | Median | 0         | .         |        |
|                              | Q1-Q3  | 0.0-0.0   | .-.       |        |
| <b>SOST (pmol/L)</b>         |        |           |           |        |
| SOST (pmol/L) at baseline    | n      | 18        | 6         | 0,973  |
|                              | Median | 43,3      | 53,3      |        |
|                              | Q1-Q3  | 38.1-65.6 | 37.9-64.6 |        |
| SOST (pmol/L) at 2 Months    | n      | 13        | 4         | 0,396  |
|                              | Median | 38,2      | 28,8      |        |
|                              | Q1-Q3  | 33.8-41.7 | 18.1-60.7 |        |
| SOST (pmol/L) at 4 Months    | n      | 9         | 2         | 0,409  |
|                              | Median | 33,2      | 65,8      |        |
|                              | Q1-Q3  | 25.0-43.3 | 32.8-98.7 |        |
| SOST (pmol/L) at 6 Months    | n      | 7         | 2         | 0,884  |
|                              | Median | 31,8      | 44,5      |        |
|                              | Q1-Q3  | 22.9-92.9 | 25.8-63.1 |        |
| SOST (pmol/L) at 8 Months    | n      | 7         | 1         | >0.999 |
|                              | Median | 29,9      | 26,2      |        |
|                              | Q1-Q3  | 21.2-63.5 | 26.2-26.2 |        |
| SOST (pmol/L) at 10 Months   | n      | 7         | 0         |        |
|                              | Median | 36,9      | .         |        |
|                              | Q1-Q3  | 20.2-64.7 | .-.       |        |
| SOST (pmol/L) at 12 Months   | n      | 2         | 0         |        |
|                              | Median | 27,8      | .         |        |
|                              | Q1-Q3  | 20.0-35.7 | .-.       |        |
| <b>Dkk1 (pmol/L)</b>         |        |           |           |        |
| Dkk1 (pmol/L) at baseline    | n      | 18        | 6         | 0,386  |
|                              | Median | 42,5      | 36,8      |        |
|                              | Q1-Q3  | 31.4-72.8 | 16.3-50.9 |        |
| Dkk1 (pmol/L) at 2 Months    | n      | 13        | 4         | 0,157  |
|                              | Median | 55,3      | 27,8      |        |
|                              | Q1-Q3  | 29.1-67.5 | 25.5-32.8 |        |
| Dkk1 (pmol/L) at 4 Months    | n      | 9         | 2         | 0,289  |
|                              | Median | 46,5      | 21,9      |        |
|                              | Q1-Q3  | 22.8-58.4 | 15.9-27.8 |        |
| Dkk1 (pmol/L) at 6 Months    | n      | 7         | 2         | 0,188  |
|                              | Median | 39,7      | 21,9      |        |
|                              | Q1-Q3  | 32.0-52.4 | 9.7-34.0  |        |
| Dkk1 (pmol/L) at 8 Months    | n      | 7         | 1         | 0,19   |
|                              | Median | 29,7      | 5,9       |        |
|                              | Q1-Q3  | 23.8-34.4 | 5.9-5.9   |        |
| Dkk1 (pmol/L) at 10 Months   | n      | 7         | 0         |        |
|                              | Median | 26,1      | .         |        |
|                              | Q1-Q3  | 9.1-31.0  | .-.       |        |
| Dkk1 (pmol/L) at 12 Months   | n      | 2         | 0         |        |



|                                |                          |             |             |        |
|--------------------------------|--------------------------|-------------|-------------|--------|
|                                | Median                   | 14,4        | .           |        |
|                                | Q1-Q3                    | 8.4-20.4    | .-.         |        |
|                                | <b>activin-A (pg/ml)</b> |             |             |        |
| activin-A (pg/ml) at baseline  | n                        | 18          | 6           | 0,92   |
|                                | Median                   | 652         | 646,8       |        |
|                                | Q1-Q3                    | 505.0-902.7 | 421.1-913.5 |        |
| activin-A (pg/ml) at 2 Months  | n                        | 13          | 4           | 0,955  |
|                                | Median                   | 447,5       | 475,3       |        |
|                                | Q1-Q3                    | 358.2-538.3 | 322.2-525.3 |        |
| activin-A (pg/ml) at 4 Months  | n                        | 9           | 2           | >0.999 |
|                                | Median                   | 418,7       | 427         |        |
|                                | Q1-Q3                    | 355.4-492.5 | 334.5-519.6 |        |
| activin-A (pg/ml) at 6 Months  | n                        | 7           | 2           | 0,884  |
|                                | Median                   | 378,7       | 438,5       |        |
|                                | Q1-Q3                    | 300.0-593.8 | 372.6-504.5 |        |
| activin-A (pg/ml) at 8 Months  | n                        | 7           | 1           | 0,383  |
|                                | Median                   | 365,7       | 537,9       |        |
|                                | Q1-Q3                    | 231.9-439.0 | 537.9-537.9 |        |
| activin-A (pg/ml) at 10 Months | n                        | 7           | 0           |        |
|                                | Median                   | 357,5       | .           |        |
|                                | Q1-Q3                    | 280.5-422.7 | .-.         |        |
| activin-A (pg/ml) at 12 Months | n                        | 2           | 0           |        |
|                                | Median                   | 287,5       | .           |        |
|                                | Q1-Q3                    | 256.8-318.2 | .-.         |        |
|                                | <b>CCL3 (ng/ml)</b>      |             |             |        |
| CCL3 (ng/ml) at baseline       | n                        | 18          | 6           | 0,571  |
|                                | Median                   | 75,9        | 84,2        |        |
|                                | Q1-Q3                    | 62.2-88.5   | 61.3-98.9   |        |
| CCL3 (ng/ml) at 2 Months       | n                        | 13          | 4           | 0,079  |
|                                | Median                   | 76,3        | 42,3        |        |
|                                | Q1-Q3                    | 61.2-95.5   | 24.7-56.6   |        |
| CCL3 (ng/ml) at 4 Months       | n                        | 9           | 2           | 0,195  |
|                                | Median                   | 63,3        | 103,1       |        |
|                                | Q1-Q3                    | 47.0-69.6   | 68.0-138.2  |        |
| CCL3 (ng/ml) at 6 Months       | n                        | 7           | 2           | 0,464  |
|                                | Median                   | 62,1        | 67,8        |        |
|                                | Q1-Q3                    | 54.0-71.1   | 61.3-74.3   |        |
| CCL3 (ng/ml) at 8 Months       | n                        | 7           | 1           | >0.999 |
|                                | Median                   | 61,1        | 55,1        |        |
|                                | Q1-Q3                    | 21.1-66.9   | 55.1-55.1   |        |
| CCL3 (ng/ml) at 10 Months      | n                        | 7           | 0           |        |
|                                | Median                   | 50,7        | .           |        |
|                                | Q1-Q3                    | 9.1-57.9    | .-.         |        |
| CCL3 (ng/ml) at 12 Months      | n                        | 2           | 0           |        |
|                                | Median                   | 34,1        | .           |        |
|                                | Q1-Q3                    | 3.9-64.3    | .-.         |        |

<sup>a</sup> Mann-Whitney U test









\_\_\_\_\_

Table S13. Biomarker values at each timepoint, by prior use of PIs

|                                  |        | Prior use of PIs |           |                      |
|----------------------------------|--------|------------------|-----------|----------------------|
|                                  |        | Yes              | No        |                      |
|                                  |        | n (%)            | n (%)     | p-value <sup>a</sup> |
| <b>bALP (µg/L)</b>               |        |                  |           |                      |
| bALP (µg/L) at baseline          | n      | 21               | 3         | 0,861                |
|                                  | Median | 11,1             | 10,5      |                      |
|                                  | Q1-Q3  | 9.3-11.7         | 7.7-17.9  |                      |
| bALP (µg/L) at 2 Months          | n      | 15               | 2         | 0,412                |
|                                  | Median | 12,4             | 9,8       |                      |
|                                  | Q1-Q3  | 9.1-17.5         | 8.0-11.7  |                      |
| bALP (µg/L) at 4 Months          | n      | 9                | 2         | 0,906                |
|                                  | Median | 11,6             | 11,1      |                      |
|                                  | Q1-Q3  | 10.8-12.9        | 7.7-14.4  |                      |
| bALP (µg/L) at 6 Months          | n      | 8                | 1         | 0,175                |
|                                  | Median | 12,6             | 19,7      |                      |
|                                  | Q1-Q3  | 7.6-14.3         | 19.7-19.7 |                      |
| bALP (µg/L) at 8 Months          | n      | 7                | 1         | 0,383                |
|                                  | Median | 15               | 18        |                      |
|                                  | Q1-Q3  | 5.6-16.9         | 18.0-18.0 |                      |
| bALP (µg/L) at 10 Months         | n      | 6                | 1         | 0,211                |
|                                  | Median | 12,4             | 20        |                      |
|                                  | Q1-Q3  | 7.0-15.8         | 20.0-20.0 |                      |
| bALP (µg/L) at 12 Months         | n      | 2                | 0         |                      |
|                                  | Median | 17,1             | .         |                      |
|                                  | Q1-Q3  | 14.5-19.7        | .-.       |                      |
| <b>Osteocalcin (ng/ml)</b>       |        |                  |           |                      |
| Osteocalcin (ng/ml) at baseline  | n      | 21               | 3         | 0,600                |
|                                  | Median | 9,2              | 7,4       |                      |
|                                  | Q1-Q3  | 5.8-11.2         | 0.5-11.4  |                      |
| Osteocalcin (ng/ml) at 2 Months  | n      | 15               | 2         | 0,602                |
|                                  | Median | 10,9             | 9,7       |                      |
|                                  | Q1-Q3  | 5.8-14.9         | 8.8-10.5  |                      |
| Osteocalcin (ng/ml) at 4 Months  | n      | 9                | 2         | 0,195                |
|                                  | Median | 17,2             | 9,9       |                      |
|                                  | Q1-Q3  | 12.3-19.2        | 8.6-11.2  |                      |
| Osteocalcin (ng/ml) at 6 Months  | n      | 8                | 1         | >0.999               |
|                                  | Median | 14,5             | 13,9      |                      |
|                                  | Q1-Q3  | 10.9-22.2        | 13.9-13.9 |                      |
| Osteocalcin (ng/ml) at 8 Months  | n      | 7                | 1         | >0.999               |
|                                  | Median | 14,9             | 16,9      |                      |
|                                  | Q1-Q3  | 6.0-29.8         | 16.9-16.9 |                      |
| Osteocalcin (ng/ml) at 10 Months | n      | 6                | 1         | 0,453                |
|                                  | Median | 12,8             | 19,7      |                      |
|                                  | Q1-Q3  | 3.8-17.7         | 19.7-19.7 |                      |
| Osteocalcin (ng/ml) at 12 Months | n      | 2                | 0         |                      |
|                                  | Median | 17,1             | .         |                      |
|                                  | Q1-Q3  | 13.3-20.8        | .-.       |                      |
| <b>PINP (pg/ml)</b>              |        |                  |           |                      |
| PINP (pg/ml) at baseline         | n      | 21               | 3         | >0.999               |

|                            |                |             |            |        |
|----------------------------|----------------|-------------|------------|--------|
|                            | Median         | 537         | 733,1      |        |
|                            | Q1-Q3          | 297.5-742.1 | 5.5-750.7  |        |
| PINP (pg/ml) at 2 Months   | n              | 15          | 2          | 0,502  |
|                            | Median         | 384,9       | 690,8      |        |
|                            | Q1-Q3          | 214.8-775.3 | 333.2-1048 |        |
| PINP (pg/ml) at 4 Months   | n              | 9           | 2          | 0,409  |
|                            | Median         | 490,2       | 1178       |        |
|                            | Q1-Q3          | 411.6-601.4 | 459.5-1897 |        |
| PINP (pg/ml) at 6 Months   | n              | 8           | 1          | 0,175  |
|                            | Median         | 441         | 2056       |        |
|                            | Q1-Q3          | 408.7-743.8 | 2056-2056  |        |
| PINP (pg/ml) at 8 Months   | n              | 7           | 1          | 0,663  |
|                            | Median         | 765,5       | 1988       |        |
|                            | Q1-Q3          | 381.1-2156  | 1988-1988  |        |
| PINP (pg/ml) at 10 Months  | n              | 6           | 1          | 0,453  |
|                            | Median         | 605,5       | 2567       |        |
|                            | Q1-Q3          | 447.6-1261  | 2567-2567  |        |
| PINP (pg/ml) at 12 Months  | n              | 2           | 0          |        |
|                            | Median         | 992,5       | .          |        |
|                            | Q1-Q3          | 701.3-1284  | .-.        |        |
|                            | CTX(ng/ml)     |             |            |        |
| CTX(ng/ml) at baseline     | n              | 21          | 3          | 0,541  |
|                            | Median         | 0,7         | 1          |        |
|                            | Q1-Q3          | 0.3-0.9     | 0.1-1.9    |        |
| CTX(ng/ml) at 2 Months     | n              | 15          | 2          | 0,881  |
|                            | Median         | 0,4         | 0,4        |        |
|                            | Q1-Q3          | 0.1-0.6     | 0.3-0.6    |        |
| CTX(ng/ml) at 4 Months     | n              | 9           | 2          | 0,289  |
|                            | Median         | 0,3         | 0,4        |        |
|                            | Q1-Q3          | 0.2-0.3     | 0.3-0.5    |        |
| CTX(ng/ml) at 6 Months     | n              | 8           | 1          | 0,561  |
|                            | Median         | 0,3         | 0,2        |        |
|                            | Q1-Q3          | 0.2-0.5     | 0.2-0.2    |        |
| CTX(ng/ml) at 8 Months     | n              | 7           | 1          | >0.999 |
|                            | Median         | 0,2         | 0,1        |        |
|                            | Q1-Q3          | 0.1-0.5     | 0.1-0.1    |        |
| CTX(ng/ml) at 10 Months    | n              | 6           | 1          | 0,803  |
|                            | Median         | 0,2         | 0,1        |        |
|                            | Q1-Q3          | 0.1-0.3     | 0.1-0.1    |        |
| CTX(ng/ml) at 12 Months    | n              | 2           | 0          |        |
|                            | Median         | 0,3         | .          |        |
|                            | Q1-Q3          | 0.2-0.4     | .-.        |        |
|                            | TRACP-5B (U/L) |             |            |        |
| TRACP-5B (U/L) at baseline | n              | 21          | 3          | 0,432  |
|                            | Median         | 3,3         | 5          |        |
|                            | Q1-Q3          | 1.8-3.7     | 1.0-7.0    |        |
| TRACP-5B (U/L) at 2 Months | n              | 15          | 2          | 0,709  |
|                            | Median         | 1,9         | 2          |        |
|                            | Q1-Q3          | 1.0-2.1     | 0.8-3.2    |        |
| TRACP-5B (U/L) at 4 Months | n              | 9           | 2          | 0,195  |



|                             |                 |         |         |        |
|-----------------------------|-----------------|---------|---------|--------|
| TRACP-5B (U/L) at 6 Months  | Median          | 1,3     | 0,8     | 0,333  |
|                             | Q1-Q3           | 1.0-2.0 | 0.5-1.2 |        |
|                             | n               | 8       | 1       |        |
|                             | Median          | 1,5     | 1       |        |
| TRACP-5B (U/L) at 8 Months  | Q1-Q3           | 1.1-1.9 | 1.0-1.0 | >0.999 |
|                             | n               | 7       | 1       |        |
|                             | Median          | 1       | 1       |        |
|                             | Q1-Q3           | 0.8-1.1 | 1.0-1.0 |        |
| TRACP-5B (U/L) at 10 Months | n               | 4       | 1       | >0.999 |
|                             | Median          | 0,9     | 0,9     |        |
|                             | Q1-Q3           | 0.8-1.4 | 0.9-0.9 |        |
|                             | n               | 2       | 0       |        |
| TRACP-5B (U/L) at 12 Months | Median          | 1,3     | .       |        |
|                             | Q1-Q3           | 0.9-1.8 | .-.     |        |
|                             | RANKL (pmol/L)  |         |         |        |
|                             | n               | 21      | 3       |        |
| RANKL (pmol/L) at baseline  | Median          | 0,2     | 0,3     | 0,793  |
|                             | Q1-Q3           | 0.2-0.4 | 0.1-0.4 |        |
|                             | n               | 15      | 2       |        |
|                             | Median          | 0,2     | 0,2     |        |
| RANKL (pmol/L) at 2 Months  | Q1-Q3           | 0.1-0.2 | 0.2-0.3 | 0,157  |
|                             | n               | 9       | 2       |        |
|                             | Median          | 0,1     | 0,1     |        |
|                             | Q1-Q3           | 0.1-0.1 | 0.1-0.2 |        |
| RANKL (pmol/L) at 4 Months  | n               | 8       | 1       | 0,561  |
|                             | Median          | 0,1     | 0,1     |        |
|                             | Q1-Q3           | 0.1-0.1 | 0.1-0.1 |        |
|                             | n               | 7       | 1       |        |
| RANKL (pmol/L) at 6 Months  | Median          | 0,1     | 0       | 0,190  |
|                             | Q1-Q3           | 0.1-0.1 | 0.0-0.0 |        |
|                             | n               | 6       | 1       |        |
|                             | Median          | 0,1     | 0       |        |
| RANKL (pmol/L) at 8 Months  | Q1-Q3           | 0.1-0.2 | 0.0-0.0 | 0,453  |
|                             | n               | 2       | 0       |        |
|                             | Median          | 0,1     | .       |        |
|                             | Q1-Q3           | 0.1-0.2 | .-.     |        |
| RANKL (pmol/L) at 10 Months | RANKL/OPG ratio |         |         | >0.999 |
|                             | n               | 21      | 3       |        |
|                             | Median          | 0,1     | 0,1     |        |
|                             | Q1-Q3           | 0.0-0.1 | 0.0-0.1 |        |
| RANKL (pmol/L) at 12 Months | n               | 15      | 2       | 0,264  |
|                             | Median          | 0       | 0       |        |
|                             | Q1-Q3           | 0.0-0.0 | 0.0-0.0 |        |
|                             | n               | 9       | 2       |        |
| RANKL/OPG ratio at baseline | Median          | 0       | 0       | 0,724  |
|                             | Q1-Q3           | 0.0-0.0 | 0.0-0.0 |        |
|                             | n               | 8       | 1       |        |
|                             | Median          | 0       | 0       |        |
| RANKL/OPG ratio at 2 Months | Q1-Q3           | 0.0-0.0 | 0.0-0.0 | 0,333  |
|                             | n               | 7       | 1       |        |
|                             | Median          | 0       | 0       |        |
|                             | Q1-Q3           | 0.0-0.0 | 0.0-0.0 |        |
| RANKL/OPG ratio at 4 Months | n               | 7       | 1       | 0,190  |
|                             | Median          | 0       | 0       |        |
|                             | Q1-Q3           | 0.0-0.0 | 0.0-0.0 |        |
|                             | n               | 7       | 1       |        |
| RANKL/OPG ratio at 6 Months | Median          | 0       | 0       | 0,190  |
|                             | Q1-Q3           | 0.0-0.0 | 0.0-0.0 |        |
|                             | n               | 7       | 1       |        |
|                             | Median          | 0       | 0       |        |
| RANKL/OPG ratio at 8 Months | Q1-Q3           | 0.0-0.0 | 0.0-0.0 | 0,190  |
|                             | n               | 7       | 1       |        |
|                             | Median          | 0       | 0       |        |
|                             | Q1-Q3           | 0.0-0.0 | 0.0-0.0 |        |

|                              |        |           |           |        |
|------------------------------|--------|-----------|-----------|--------|
|                              | Median | 0         | 0         |        |
|                              | Q1-Q3  | 0.0-0.0   | 0.0-0.0   |        |
| RANKL/OPG ratio at 10 Months | n      | 6         | 1         | 0,453  |
|                              | Median | 0         | 0         |        |
|                              | Q1-Q3  | 0.0-0.0   | 0.0-0.0   |        |
| RANKL/OPG ratio at 12 Months | n      | 2         | 0         |        |
|                              | Median | 0         | .         |        |
|                              | Q1-Q3  | 0.0-0.0   | .-.       |        |
| <b>SOST (pmol/L)</b>         |        |           |           |        |
| SOST (pmol/L) at baseline    | n      | 21        | 3         | 0,163  |
|                              | Median | 50,3      | 33,2      |        |
|                              | Q1-Q3  | 39.4-65.6 | 32.4-56.2 |        |
| SOST (pmol/L) at 2 Months    | n      | 15        | 2         | 0,502  |
|                              | Median | 38,2      | 32,6      |        |
|                              | Q1-Q3  | 29.4-48.3 | 27.9-37.2 |        |
| SOST (pmol/L) at 4 Months    | n      | 9         | 2         | 0,556  |
|                              | Median | 33,2      | 29,8      |        |
|                              | Q1-Q3  | 29.7-45.8 | 22.8-36.7 |        |
| SOST (pmol/L) at 6 Months    | n      | 8         | 1         | 0,561  |
|                              | Median | 40        | 25,5      |        |
|                              | Q1-Q3  | 24.4-78.0 | 25.5-25.5 |        |
| SOST (pmol/L) at 8 Months    | n      | 7         | 1         | 0,383  |
|                              | Median | 29,9      | 21,2      |        |
|                              | Q1-Q3  | 23.5-63.5 | 21.2-21.2 |        |
| SOST (pmol/L) at 10 Months   | n      | 6         | 1         | 0,453  |
|                              | Median | 38,7      | 20,2      |        |
|                              | Q1-Q3  | 21.1-64.7 | 20.2-20.2 |        |
| SOST (pmol/L) at 12 Months   | n      | 2         | 0         |        |
|                              | Median | 27,8      | .         |        |
|                              | Q1-Q3  | 20.0-35.7 | .-.       |        |
| <b>Dkk1 (pmol/L)</b>         |        |           |           |        |
| Dkk1 (pmol/L) at baseline    | n      | 21        | 3         | 0,485  |
|                              | Median | 42        | 35,5      |        |
|                              | Q1-Q3  | 31.4-72.8 | 16.3-54.7 |        |
| Dkk1 (pmol/L) at 2 Months    | n      | 15        | 2         | 0,941  |
|                              | Median | 36,9      | 35,6      |        |
|                              | Q1-Q3  | 24.4-67.5 | 29.1-42.0 |        |
| Dkk1 (pmol/L) at 4 Months    | n      | 9         | 2         | 0,409  |
|                              | Median | 33,7      | 30,6      |        |
|                              | Q1-Q3  | 22.8-58.4 | 14.6-46.5 |        |
| Dkk1 (pmol/L) at 6 Months    | n      | 8         | 1         | 0,561  |
|                              | Median | 35,5      | 49,2      |        |
|                              | Q1-Q3  | 26.6-46.1 | 49.2-49.2 |        |
| Dkk1 (pmol/L) at 8 Months    | n      | 7         | 1         | >0.999 |
|                              | Median | 28,2      | 29,7      |        |
|                              | Q1-Q3  | 19.2-34.4 | 29.7-29.7 |        |
| Dkk1 (pmol/L) at 10 Months   | n      | 6         | 1         | 0,211  |
|                              | Median | 21,2      | 38,7      |        |
|                              | Q1-Q3  | 9.1-28.7  | 38.7-38.7 |        |
| Dkk1 (pmol/L) at 12 Months   | n      | 2         | 0         |        |

|                                |                          |             |             |        |
|--------------------------------|--------------------------|-------------|-------------|--------|
|                                | Median                   | 14,4        | .           |        |
|                                | Q1-Q3                    | 8.4-20.4    | .-.         |        |
|                                | <b>activin-A (pg/ml)</b> |             |             |        |
| activin-A (pg/ml) at baseline  | n                        | 21          | 3           | 0,138  |
|                                | Median                   | 694,3       | 524,9       |        |
|                                | Q1-Q3                    | 505.0-904.2 | 286.2-548.3 |        |
| activin-A (pg/ml) at 2 Months  | n                        | 15          | 2           | 0,157  |
|                                | Median                   | 477,3       | 336,9       |        |
|                                | Q1-Q3                    | 390.4-562.2 | 315.5-358.2 |        |
| activin-A (pg/ml) at 4 Months  | n                        | 9           | 2           | 0,195  |
|                                | Median                   | 468,3       | 289,5       |        |
|                                | Q1-Q3                    | 412.5-519.6 | 223.6-355.4 |        |
| activin-A (pg/ml) at 6 Months  | n                        | 8           | 1           | 0,175  |
|                                | Median                   | 383,5       | 215         |        |
|                                | Q1-Q3                    | 369.7-549.1 | 215.0-215.0 |        |
| activin-A (pg/ml) at 8 Months  | n                        | 7           | 1           | 0,663  |
|                                | Median                   | 418,4       | 319         |        |
|                                | Q1-Q3                    | 231.9-537.9 | 319.0-319.0 |        |
| activin-A (pg/ml) at 10 Months | n                        | 6           | 1           | 0,211  |
|                                | Median                   | 360,2       | 201         |        |
|                                | Q1-Q3                    | 283.8-422.7 | 201.0-201.0 |        |
| activin-A (pg/ml) at 12 Months | n                        | 2           | 0           |        |
|                                | Median                   | 287,5       | .           |        |
|                                | Q1-Q3                    | 256.8-318.2 | .-.         |        |
|                                | <b>CCL3 (ng/ml)</b>      |             |             |        |
| CCL3 (ng/ml) at baseline       | n                        | 21          | 3           | 0,337  |
|                                | Median                   | 76,6        | 81,9        |        |
|                                | Q1-Q3                    | 61.3-88.5   | 73.9-105.8  |        |
| CCL3 (ng/ml) at 2 Months       | n                        | 15          | 2           | 0,941  |
|                                | Median                   | 67,4        | 70,8        |        |
|                                | Q1-Q3                    | 39.0-95.5   | 70.5-71.2   |        |
| CCL3 (ng/ml) at 4 Months       | n                        | 9           | 2           | 0,906  |
|                                | Median                   | 68          | 66,4        |        |
|                                | Q1-Q3                    | 47.0-72.0   | 63.3-69.6   |        |
| CCL3 (ng/ml) at 6 Months       | n                        | 8           | 1           | >0.999 |
|                                | Median                   | 64,4        | 62,1        |        |
|                                | Q1-Q3                    | 57.6-72.1   | 62.1-62.1   |        |
| CCL3 (ng/ml) at 8 Months       | n                        | 7           | 1           | 0,383  |
|                                | Median                   | 55,1        | 66,9        |        |
|                                | Q1-Q3                    | 21.1-63.5   | 66.9-66.9   |        |
| CCL3 (ng/ml) at 10 Months      | n                        | 6           | 1           | 0,453  |
|                                | Median                   | 32,4        | 57,9        |        |
|                                | Q1-Q3                    | 9.1-56.0    | 57.9-57.9   |        |
| CCL3 (ng/ml) at 12 Months      | n                        | 2           | 0           |        |
|                                | Median                   | 34,1        | .           |        |
|                                | Q1-Q3                    | 3.9-64.3    | .-.         |        |

<sup>a</sup> Mann-Whitney U test









\_\_\_\_\_



Table S14. Biomarker values at each timepoint, by lytic bone lesions at Kd initiation

|                                 |        | Lytic bone lesions at Kd initiation |           |           |           | p-value <sup>a</sup> |
|---------------------------------|--------|-------------------------------------|-----------|-----------|-----------|----------------------|
|                                 |        | None                                | 1-3       | 4-10      | >10       |                      |
|                                 |        | n (%)                               | n (%)     | n (%)     | n (%)     |                      |
|                                 |        | bALP (µg/L)                         |           |           |           |                      |
| bALP (µg/L) at baseline         | n      | 4                                   | 5         | 7         | 8         | 0,415                |
|                                 | Median | 16,4                                | 11,2      | 10,5      | 10,4      |                      |
|                                 | Q1-Q3  | 10.1-27.3                           | 10.7-11.7 | 7.8-11.7  | 9.2-11.3  |                      |
| bALP (µg/L) at 2 Months         | n      | 4                                   | 1         | 6         | 6         | 0,825                |
|                                 | Median | 11,5                                | 10,1      | 11,9      | 12,6      |                      |
|                                 | Q1-Q3  | 7.6-17.5                            | 10.1-10.1 | 9.1-12.9  | 9.4-19.1  |                      |
| bALP (µg/L) at 4 Months         | n      | 2                                   | 0         | 4         | 5         | 0,817                |
|                                 | Median | 10,5                                | .         | 12,8      | 11,3      |                      |
|                                 | Q1-Q3  | 9.1-11.9                            | .-.       | 10.2-14.3 | 10.8-12.9 |                      |
| bALP (µg/L) at 6 Months         | n      | 2                                   | 0         | 4         | 3         | 0,638                |
|                                 | Median | 9,8                                 | .         | 14,2      | 13,7      |                      |
|                                 | Q1-Q3  | 8.1-11.6                            | .-.       | 10.2-17.3 | 7.1-14.8  |                      |
| bALP (µg/L) at 8 Months         | n      | 1                                   | 0         | 4         | 3         | 0,297                |
|                                 | Median | 3,8                                 | .         | 16,5      | 16,9      |                      |
|                                 | Q1-Q3  | 3.8-3.8                             | .-.       | 10.3-18.8 | 6.8-16.9  |                      |
| bALP (µg/L) at 10 Months        | n      | 1                                   | 0         | 3         | 3         | 0,565                |
|                                 | Median | 7                                   | .         | 15        | 15,8      |                      |
|                                 | Q1-Q3  | 7.0-7.0                             | .-.       | 5.9-20.0  | 9.8-18.1  |                      |
| bALP (µg/L) at 12 Months        | n      | 0                                   | 0         | 1         | 1         |                      |
|                                 | Median | .                                   | .         | 14,5      | 19,7      |                      |
|                                 | Q1-Q3  | .-.                                 | .-.       | 14.5-14.5 | 19.7-19.7 |                      |
|                                 |        | Osteocalcin (ng/ml)                 |           |           |           |                      |
| Osteocalcin (ng/ml) at baseline | n      | 4                                   | 5         | 7         | 8         | 0,447                |
|                                 | Median | 14,2                                | 10,1      | 7,5       | 7,9       |                      |
|                                 | Q1-Q3  | 8.6-22.2                            | 5.8-11.4  | 2.9-10.8  | 4.6-10.6  |                      |
| Osteocalcin (ng/ml) at 2 Months | n      | 4                                   | 1         | 6         | 6         | 0,748                |
|                                 | Median | 11,7                                | 14,1      | 10        | 10,7      |                      |
|                                 | Q1-Q3  | 5.7-15.9                            | 14.1-14.1 | 8.8-12.2  | 5.8-20.4  |                      |

|                                  |        |             |             |             |             |       |
|----------------------------------|--------|-------------|-------------|-------------|-------------|-------|
| Osteocalcin (ng/ml) at 4 Months  | n      | 2           | 0           | 4           | 5           | 0,493 |
|                                  | Median | 18,3        | .           | 11,7        | 12,4        |       |
|                                  | Q1-Q3  | 17.2-19.4   | .-.         | 10.5-15.7   | 8.6-17.7    |       |
| Osteocalcin (ng/ml) at 6 Months  | n      | 2           | 0           | 4           | 3           | 0,737 |
|                                  | Median | 11,4        | .           | 15,1        | 12,8        |       |
|                                  | Q1-Q3  | 4.0-18.9    | .-.         | 12.5-21.4   | 10.8-25.4   |       |
| Osteocalcin (ng/ml) at 8 Months  | n      | 1           | 0           | 4           | 3           | 0,4   |
|                                  | Median | 6           | .           | 17,4        | 14,9        |       |
|                                  | Q1-Q3  | 6.0-6.0     | .-.         | 12.7-29.0   | 5.6-29.8    |       |
| Osteocalcin (ng/ml) at 10 Months | n      | 1           | 0           | 3           | 3           | 0,319 |
|                                  | Median | 2,8         | .           | 17,7        | 16,8        |       |
|                                  | Q1-Q3  | 2.8-2.8     | .-.         | 3.8-19.7    | 8.9-28.2    |       |
| Osteocalcin (ng/ml) at 12 Months | n      | 0           | 0           | 1           | 1           |       |
|                                  | Median | .           | .           | 20,8        | 13,3        |       |
|                                  | Q1-Q3  | .-.         | .-.         | 20.8-20.8   | 13.3-13.3   |       |
| PINP (pg/ml)                     |        |             |             |             |             |       |
| PINP (pg/ml) at baseline         | n      | 4           | 5           | 7           | 8           | 0,922 |
|                                  | Median | 572,1       | 487,7       | 572,8       | 565,3       |       |
|                                  | Q1-Q3  | 263.1-1055  | 467.8-537.0 | 297.5-733.1 | 234.5-761.2 |       |
| PINP (pg/ml) at 2 Months         | n      | 4           | 1           | 6           | 6           | 0,714 |
|                                  | Median | 281,9       | 550,8       | 581,9       | 451,3       |       |
|                                  | Q1-Q3  | 157.0-580.1 | 550.8-550.8 | 214.8-1048  | 229.5-710.7 |       |
| PINP (pg/ml) at 4 Months         | n      | 2           | 0           | 4           | 5           | 0,252 |
|                                  | Median | 362,7       | .           | 1084        | 459,5       |       |
|                                  | Q1-Q3  | 235.2-490.2 | .-.         | 506.5-1732  | 439.2-514.2 |       |
| PINP (pg/ml) at 6 Months         | n      | 2           | 0           | 4           | 3           | 0,233 |
|                                  | Median | 267,4       | .           | 1242        | 442,8       |       |
|                                  | Q1-Q3  | 95.6-439.3  | .-.         | 593.4-1875  | 419.7-698.7 |       |
| PINP (pg/ml) at 8 Months         | n      | 1           | 0           | 4           | 3           | 0,311 |
|                                  | Median | 198,9       | .           | 1496        | 765,5       |       |
|                                  | Q1-Q3  | 198.9-198.9 | .-.         | 692.8-2072  | 541.1-3505  |       |
| PINP (pg/ml) at 10 Months        | n      | 1           | 0           | 3           | 3           | 0,565 |
|                                  | Median | 447,6       | .           | 1261        | 652         |       |

|                            |        |             |         |            |             |       |
|----------------------------|--------|-------------|---------|------------|-------------|-------|
| PINP (pg/ml) at 12 Months  | Q1-Q3  | 447.6-447.6 | .-.     | 335.8-2567 | 559.0-3650  |       |
|                            | n      | 0           | 0       | 1          | 1           |       |
|                            | Median | .           | .       | 1284       | 701,3       |       |
|                            | Q1-Q3  | .-.         | .-.     | 1284-1284  | 701.3-701.3 |       |
| <b>CTX(ng/ml)</b>          |        |             |         |            |             |       |
| CTX(ng/ml) at baseline     | n      | 4           | 5       | 7          | 8           | 0,645 |
|                            | Median | 0,4         | 0,9     | 0,8        | 0,6         |       |
|                            | Q1-Q3  | 0.2-0.9     | 0.7-1.2 | 0.2-0.9    | 0.3-0.9     |       |
| CTX(ng/ml) at 2 Months     | n      | 4           | 1       | 6          | 6           | 0,14  |
|                            | Median | 0,2         | 0,8     | 0,5        | 0,5         |       |
|                            | Q1-Q3  | 0.1-0.3     | 0.8-0.8 | 0.1-0.6    | 0.3-0.7     |       |
| CTX(ng/ml) at 4 Months     | n      | 2           | 0       | 4          | 5           | 0,161 |
|                            | Median | 0,1         | .       | 0,3        | 0,5         |       |
|                            | Q1-Q3  | 0.1-0.2     | .-.     | 0.3-0.3    | 0.2-0.7     |       |
| CTX(ng/ml) at 6 Months     | n      | 2           | 0       | 4          | 3           | 0,3   |
|                            | Median | 0,2         | .       | 0,3        | 0,6         |       |
|                            | Q1-Q3  | 0.1-0.2     | .-.     | 0.2-0.4    | 0.1-0.7     |       |
| CTX(ng/ml) at 8 Months     | n      | 1           | 0       | 4          | 3           | 0,683 |
|                            | Median | 0,2         | .       | 0,1        | 0,5         |       |
|                            | Q1-Q3  | 0.2-0.2     | .-.     | 0.1-0.2    | 0.0-0.5     |       |
| CTX(ng/ml) at 10 Months    | n      | 1           | 0       | 3          | 3           | 0,931 |
|                            | Median | 0,2         | .       | 0,1        | 0,2         |       |
|                            | Q1-Q3  | 0.2-0.2     | .-.     | 0.1-0.3    | 0.1-0.4     |       |
| CTX(ng/ml) at 12 Months    | n      | 0           | 0       | 1          | 1           |       |
|                            | Median | .           | .       | 0,2        | 0,4         |       |
|                            | Q1-Q3  | .-.         | .-.     | 0.2-0.2    | 0.4-0.4     |       |
| <b>TRACP-5B (U/L)</b>      |        |             |         |            |             |       |
| TRACP-5B (U/L) at baseline | n      | 4           | 5       | 7          | 8           | 0,18  |
|                            | Median | 1,7         | 3,9     | 3,3        | 2,6         |       |
|                            | Q1-Q3  | 1.3-2.8     | 3.6-4.8 | 2.2-4.0    | 1.3-4.0     |       |
| TRACP-5B (U/L) at 2 Months | n      | 4           | 1       | 6          | 6           | 0,138 |
|                            | Median | 0,6         | 1,9     | 2,2        | 1,8         |       |
|                            | Q1-Q3  | 0.6-1.4     | 1.9-1.9 | 1.8-3.1    | 1.0-1.9     |       |

|                             |        |         |         |         |          |       |
|-----------------------------|--------|---------|---------|---------|----------|-------|
| TRACP-5B (U/L) at 4 Months  | n      | 2       | 0       | 4       | 5        | 0,734 |
|                             | Median | 1       | .       | 1,6     | 1,2      |       |
|                             | Q1-Q3  | 0.8-1.3 | .-.     | 1.0-2.2 | 1.0-1.9  |       |
| TRACP-5B (U/L) at 6 Months  | n      | 2       | 0       | 4       | 3        | 0,737 |
|                             | Median | 1,6     | .       | 1,4     | 1,2      |       |
|                             | Q1-Q3  | 1.3-1.9 | .-.     | 0.9-1.8 | 1.1-15.9 |       |
| TRACP-5B (U/L) at 8 Months  | n      | 1       | 0       | 4       | 3        | 0,297 |
|                             | Median | 0,6     | .       | 1       | 1        |       |
|                             | Q1-Q3  | 0.6-0.6 | .-.     | 1.0-1.1 | 0.8-2.2  |       |
| TRACP-5B (U/L) at 10 Months | n      | 0       | 0       | 3       | 2        | 0,083 |
|                             | Median | .       | .       | 0,9     | 1,4      |       |
|                             | Q1-Q3  | .-.     | .-.     | 0.8-0.9 | 0.9-2.0  |       |
| TRACP-5B (U/L) at 12 Months | n      | 0       | 0       | 1       | 1        |       |
|                             | Median | .       | .       | 0,9     | 1,8      |       |
|                             | Q1-Q3  | .-.     | .-.     | 0.9-0.9 | 1.8-1.8  |       |
| RANKL (pmol/L)              |        |         |         |         |          |       |
| RANKL (pmol/L) at baseline  | n      | 4       | 5       | 7       | 8        | 0,969 |
|                             | Median | 0,2     | 0,2     | 0,4     | 0,3      |       |
|                             | Q1-Q3  | 0.2-0.4 | 0.2-0.3 | 0.1-0.5 | 0.1-0.5  |       |
| RANKL (pmol/L) at 2 Months  | n      | 4       | 1       | 6       | 6        | 0,732 |
|                             | Median | 0,1     | 0,2     | 0,2     | 0,2      |       |
|                             | Q1-Q3  | 0.1-0.2 | 0.2-0.2 | 0.2-0.2 | 0.1-0.2  |       |
| RANKL (pmol/L) at 4 Months  | n      | 2       | 0       | 4       | 5        | 0,763 |
|                             | Median | 0,1     | .       | 0,1     | 0,1      |       |
|                             | Q1-Q3  | 0.1-0.1 | .-.     | 0.1-0.1 | 0.1-0.2  |       |
| RANKL (pmol/L) at 6 Months  | n      | 2       | 0       | 4       | 3        | 0,472 |
|                             | Median | 0,1     | .       | 0,1     | 0,2      |       |
|                             | Q1-Q3  | 0.1-0.1 | .-.     | 0.1-0.1 | 0.1-0.2  |       |
| RANKL (pmol/L) at 8 Months  | n      | 1       | 0       | 4       | 3        | 0,806 |
|                             | Median | 0,1     | .       | 0,1     | 0,1      |       |
|                             | Q1-Q3  | 0.1-0.1 | .-.     | 0.0-0.1 | 0.0-0.2  |       |
| RANKL (pmol/L) at 10 Months | n      | 1       | 0       | 3       | 3        | 0,867 |
|                             | Median | 0,1     | .       | 0,1     | 0,1      |       |

|                              |        |           |           |           |           |       |
|------------------------------|--------|-----------|-----------|-----------|-----------|-------|
| RANKL (pmol/L) at 12 Months  | Q1-Q3  | 0.1-0.1   | .-.       | 0.0-0.2   | 0.0-0.3   |       |
|                              | n      | 0         | 0         | 1         | 1         |       |
|                              | Median | .         | .         | 0,1       | 0,2       |       |
|                              | Q1-Q3  | .-.       | .-.       | 0.1-0.1   | 0.2-0.2   |       |
| <b>RANKL/OPG ratio</b>       |        |           |           |           |           |       |
| RANKL/OPG ratio at baseline  | n      | 4         | 5         | 7         | 8         | 0,873 |
|                              | Median | 0,1       | 0,1       | 0,1       | 0,1       |       |
|                              | Q1-Q3  | 0.0-0.1   | 0.1-0.1   | 0.0-0.1   | 0.0-0.1   |       |
| RANKL/OPG ratio at 2 Months  | n      | 4         | 1         | 6         | 6         | 0,954 |
|                              | Median | 0         | 0         | 0         | 0         |       |
|                              | Q1-Q3  | 0.0-0.1   | 0.0-0.0   | 0.0-0.0   | 0.0-0.0   |       |
| RANKL/OPG ratio at 4 Months  | n      | 2         | 0         | 4         | 5         | 0,861 |
|                              | Median | 0         | .         | 0         | 0         |       |
|                              | Q1-Q3  | 0.0-0.0   | .-.       | 0.0-0.0   | 0.0-0.0   |       |
| RANKL/OPG ratio at 6 Months  | n      | 2         | 0         | 4         | 3         | 0,607 |
|                              | Median | 0         | .         | 0         | 0         |       |
|                              | Q1-Q3  | 0.0-0.0   | .-.       | 0.0-0.0   | 0.0-0.0   |       |
| RANKL/OPG ratio at 8 Months  | n      | 1         | 0         | 4         | 3         | 0,297 |
|                              | Median | 0         | .         | 0         | 0         |       |
|                              | Q1-Q3  | 0.0-0.0   | .-.       | 0.0-0.0   | 0.0-0.0   |       |
| RANKL/OPG ratio at 10 Months | n      | 1         | 0         | 3         | 3         | 0,931 |
|                              | Median | 0         | .         | 0         | 0         |       |
|                              | Q1-Q3  | 0.0-0.0   | .-.       | 0.0-0.0   | 0.0-0.1   |       |
| RANKL/OPG ratio at 12 Months | n      | 0         | 0         | 1         | 1         |       |
|                              | Median | .         | .         | 0         | 0         |       |
|                              | Q1-Q3  | .-.       | .-.       | 0.0-0.0   | 0.0-0.0   |       |
| <b>SOST (pmol/L)</b>         |        |           |           |           |           |       |
| SOST (pmol/L) at baseline    | n      | 4         | 5         | 7         | 8         | 0,205 |
|                              | Median | 67,6      | 41,8      | 38,1      | 52,2      |       |
|                              | Q1-Q3  | 57.4-80.2 | 41.4-56.2 | 33.2-62.9 | 35.9-66.0 |       |
| SOST (pmol/L) at 2 Months    | n      | 4         | 1         | 6         | 6         | 0,779 |
|                              | Median | 53,3      | 48,3      | 35,1      | 37,7      |       |
|                              | Q1-Q3  | 18.1-85.2 | 48.3-48.3 | 33.8-40.7 | 29.4-40.1 |       |

|                            |        |           |           |           |            |       |
|----------------------------|--------|-----------|-----------|-----------|------------|-------|
| SOST (pmol/L) at 4 Months  | n      | 2         | 0         | 4         | 5          | 0,145 |
|                            | Median | 66        | .         | 27,4      | 43,3       |       |
|                            | Q1-Q3  | 33.2-98.7 | .-.       | 23.9-31.2 | 36.7-45.8  |       |
| SOST (pmol/L) at 6 Months  | n      | 2         | 0         | 4         | 3          | 0,946 |
|                            | Median | 43        | .         | 28,8      | 48,1       |       |
|                            | Q1-Q3  | 22.9-63.1 | .-.       | 25.6-62.3 | 21.6-149.6 |       |
| SOST (pmol/L) at 8 Months  | n      | 1         | 0         | 4         | 3          | 0,806 |
|                            | Median | 44,3      | .         | 24,8      | 29,9       |       |
|                            | Q1-Q3  | 44.3-44.3 | .-.       | 22.3-69.7 | 20.4-63.5  |       |
| SOST (pmol/L) at 10 Months | n      | 1         | 0         | 3         | 3          | 0,565 |
|                            | Median | 64,7      | .         | 21,1      | 36,9       |       |
|                            | Q1-Q3  | 64.7-64.7 | .-.       | 20.2-40.5 | 19.3-82.1  |       |
| SOST (pmol/L) at 12 Months | n      | 0         | 0         | 1         | 1          |       |
|                            | Median | .         | .         | 20        | 35,7       |       |
|                            | Q1-Q3  | .-.       | .-.       | 20.0-20.0 | 35.7-35.7  |       |
| Dkk1 (pmol/L)              |        |           |           |           |            |       |
| Dkk1 (pmol/L) at baseline  | n      | 4         | 5         | 7         | 8          | 0,475 |
|                            | Median | 63,8      | 35,5      | 52,4      | 41,6       |       |
|                            | Q1-Q3  | 33.6-76.6 | 31.4-37.5 | 32.0-75.9 | 20.7-57.9  |       |
| Dkk1 (pmol/L) at 2 Months  | n      | 4         | 1         | 6         | 6          | 0,431 |
|                            | Median | 27,8      | 22,7      | 52,3      | 43,3       |       |
|                            | Q1-Q3  | 25.5-54.0 | 22.7-22.7 | 36.9-67.5 | 29.1-58.4  |       |
| Dkk1 (pmol/L) at 4 Months  | n      | 2         | 0         | 4         | 5          | 0,932 |
|                            | Median | 39,6      | .         | 37,2      | 33,7       |       |
|                            | Q1-Q3  | 15.9-63.3 | .-.       | 23.1-54.7 | 22.8-57.5  |       |
| Dkk1 (pmol/L) at 6 Months  | n      | 2         | 0         | 4         | 3          | 0,741 |
|                            | Median | 31,1      | .         | 35,5      | 39,7       |       |
|                            | Q1-Q3  | 9.7-52.4  | .-.       | 27.6-43.1 | 32.0-54.8  |       |
| Dkk1 (pmol/L) at 8 Months  | n      | 1         | 0         | 4         | 3          | 0,092 |
|                            | Median | 51,3      | .         | 21,5      | 31         |       |
|                            | Q1-Q3  | 51.3-51.3 | .-.       | 12.6-26.8 | 28.2-34.4  |       |
| Dkk1 (pmol/L) at 10 Months | n      | 1         | 0         | 3         | 3          | 0,751 |
|                            | Median | 28,7      | .         | 9,1       | 26,1       |       |

|                                |        |             |             |             |             |        |
|--------------------------------|--------|-------------|-------------|-------------|-------------|--------|
| Dkk1 (pmol/L) at 12 Months     | Q1-Q3  | 28.7-28.7   | .-.         | 8.4-38.7    | 16.3-31.0   |        |
|                                | n      | 0           | 0           | 1           | 1           |        |
|                                | Median | .           | .           | 8,4         | 20,4        |        |
|                                | Q1-Q3  | .-.         | .-.         | 8.4-8.4     | 20.4-20.4   |        |
| <b>activin-A (pg/ml)</b>       |        |             |             |             |             |        |
| activin-A (pg/ml) at baseline  | n      | 4           | 5           | 7           | 8           | 0,449  |
|                                | Median | 456,7       | 694,3       | 554,1       | 740,3       |        |
|                                | Q1-Q3  | 349.3-834.4 | 636.1-904.2 | 505.0-902.7 | 477.1-846.0 |        |
| activin-A (pg/ml) at 2 Months  | n      | 4           | 1           | 6           | 6           | 0,568  |
|                                | Median | 462,6       | 477,3       | 418,9       | 572,8       |        |
|                                | Q1-Q3  | 309.5-525.3 | 477.3-477.3 | 321.0-462.2 | 358.2-786.7 |        |
| activin-A (pg/ml) at 4 Months  | n      | 2           | 0           | 4           | 5           | 0,417  |
|                                | Median | 466,1       | .           | 279         | 468,3       |        |
|                                | Q1-Q3  | 412.5-519.6 | .-.         | 204.8-619.6 | 418.7-492.5 |        |
| activin-A (pg/ml) at 6 Months  | n      | 2           | 0           | 4           | 3           | 0,856  |
|                                | Median | 380,5       | .           | 402,2       | 378,7       |        |
|                                | Q1-Q3  | 372.6-388.3 | .-.         | 257.5-549.1 | 366.9-695.8 |        |
| activin-A (pg/ml) at 8 Months  | n      | 1           | 0           | 4           | 3           | 0,953  |
|                                | Median | 365,7       | .           | 428,4       | 418,4       |        |
|                                | Q1-Q3  | 365.7-365.7 | .-.         | 266.2-760.3 | 231.9-439.0 |        |
| activin-A (pg/ml) at 10 Months | n      | 1           | 0           | 3           | 3           | >0.999 |
|                                | Median | 357,5       | .           | 362,8       | 283,8       |        |
|                                | Q1-Q3  | 357.5-357.5 | .-.         | 201.0-422.7 | 280.5-467.5 |        |
| activin-A (pg/ml) at 12 Months | n      | 0           | 0           | 1           | 1           |        |
|                                | Median | .           | .           | 256,8       | 318,2       |        |
|                                | Q1-Q3  | .-.         | .-.         | 256.8-256.8 | 318.2-318.2 |        |
| <b>CCL3 (ng/ml)</b>            |        |             |             |             |             |        |
| CCL3 (ng/ml) at baseline       | n      | 4           | 5           | 7           | 8           | 0,399  |
|                                | Median | 74,7        | 101,8       | 75,3        | 75,7        |        |
|                                | Q1-Q3  | 42.0-94.5   | 81.3-105.8  | 62.2-94.8   | 46.9-81.1   |        |
| CCL3 (ng/ml) at 2 Months       | n      | 4           | 1           | 6           | 6           | 0,584  |
|                                | Median | 42,3        | 95,5        | 69,3        | 79,9        |        |
|                                | Q1-Q3  | 24.7-71.3   | 95.5-95.5   | 61.2-76.3   | 11.1-102.7  |        |

|                           |        |            |     |           |           |       |
|---------------------------|--------|------------|-----|-----------|-----------|-------|
| CCL3 (ng/ml) at 4 Months  | n      | 2          | 0   | 4         | 5         | 0,097 |
|                           | Median | 110,6      | .   | 64,6      | 63,3      |       |
|                           | Q1-Q3  | 82.9-138.2 | .-. | 54.1-68.8 | 34.3-68.0 |       |
| CCL3 (ng/ml) at 6 Months  | n      | 2          | 0   | 4         | 3         | 0,197 |
|                           | Median | 72,7       | .   | 61,7      | 54        |       |
|                           | Q1-Q3  | 71.1-74.3  | .-. | 61.3-64.8 | 6.3-73.1  |       |
| CCL3 (ng/ml) at 8 Months  | n      | 1          | 0   | 4         | 3         | 0,757 |
|                           | Median | 63,5       | .   | 54,7      | 61,1      |       |
|                           | Q1-Q3  | 63.5-63.5  | .-. | 37.7-61.0 | 8.7-88.9  |       |
| CCL3 (ng/ml) at 10 Months | n      | 1          | 0   | 3         | 3         | 0,565 |
|                           | Median | 56         | .   | 57,9      | 14,2      |       |
|                           | Q1-Q3  | 56.0-56.0  | .-. | 3.3-60.8  | 9.1-50.7  |       |
| CCL3 (ng/ml) at 12 Months | n      | 0          | 0   | 1         | 1         |       |
|                           | Median | .          | .   | 64,3      | 3,9       |       |
|                           | Q1-Q3  | .-.        | .-. | 64.3-64.3 | 3.9-3.9   |       |

<sup>a</sup> Kruskal-Wallis test



Table S15. Biomarker values at each timepoint, by history of SREs

|                                  |        | History of SREs |           |                      |
|----------------------------------|--------|-----------------|-----------|----------------------|
|                                  |        | Yes             | No        |                      |
|                                  |        | n (%)           | n (%)     | p-value <sup>a</sup> |
| <b>bALP (µg/L)</b>               |        |                 |           |                      |
| bALP (µg/L) at baseline          | n      | 9               | 15        | 0,633                |
|                                  | Median | 11,1            | 10,7      |                      |
|                                  | Q1-Q3  | 10.0-11.7       | 8.3-11.5  |                      |
| bALP (µg/L) at 2 Months          | n      | 5               | 12        | 0,635                |
|                                  | Median | 12,1            | 12        |                      |
|                                  | Q1-Q3  | 9.4-19.1        | 8.5-14.2  |                      |
| bALP (µg/L) at 4 Months          | n      | 3               | 8         | 0,759                |
|                                  | Median | 11,3            | 11,7      |                      |
|                                  | Q1-Q3  | 10.8-28.2       | 9.0-13.5  |                      |
| bALP (µg/L) at 6 Months          | n      | 3               | 6         | 0,897                |
|                                  | Median | 13,6            | 12,7      |                      |
|                                  | Q1-Q3  | 7.1-14.8        | 8.1-14.8  |                      |
| bALP (µg/L) at 8 Months          | n      | 3               | 5         | 0,766                |
|                                  | Median | 15              | 16,9      |                      |
|                                  | Q1-Q3  | 6.8-16.9        | 5.6-18.0  |                      |
| bALP (µg/L) at 10 Months         | n      | 3               | 4         | >0.999               |
|                                  | Median | 15              | 12,5      |                      |
|                                  | Q1-Q3  | 9.8-15.8        | 6.4-19.0  |                      |
| bALP (µg/L) at 12 Months         | n      | 2               | 0         |                      |
|                                  | Median | 17,1            | .         |                      |
|                                  | Q1-Q3  | 14.5-19.7       | .-.       |                      |
| <b>Osteocalcin (ng/ml)</b>       |        |                 |           |                      |
| Osteocalcin (ng/ml) at baseline  | n      | 9               | 15        | 0,592                |
|                                  | Median | 10,1            | 7,5       |                      |
|                                  | Q1-Q3  | 6.6-11.2        | 3.9-11.9  |                      |
| Osteocalcin (ng/ml) at 2 Months  | n      | 5               | 12        | 0,562                |
|                                  | Median | 10,9            | 10        |                      |
|                                  | Q1-Q3  | 10.5-14.9       | 7.3-14.1  |                      |
| Osteocalcin (ng/ml) at 4 Months  | n      | 3               | 8         | 0,61                 |
|                                  | Median | 12,4            | 14,7      |                      |
|                                  | Q1-Q3  | 1.0-17.7        | 10.5-19.3 |                      |
| Osteocalcin (ng/ml) at 6 Months  | n      | 3               | 6         | 0,519                |
|                                  | Median | 12,8            | 16,4      |                      |
|                                  | Q1-Q3  | 10.8-16.2       | 11.1-25.4 |                      |
| Osteocalcin (ng/ml) at 8 Months  | n      | 3               | 5         | 0,551                |
|                                  | Median | 14,9            | 16,9      |                      |
|                                  | Q1-Q3  | 5.6-17.8        | 8.5-29.8  |                      |
| Osteocalcin (ng/ml) at 10 Months | n      | 3               | 4         | >0.999               |
|                                  | Median | 16,8            | 11,7      |                      |
|                                  | Q1-Q3  | 8.9-17.7        | 3.3-23.9  |                      |
| Osteocalcin (ng/ml) at 12 Months | n      | 2               | 0         |                      |
|                                  | Median | 17,1            | .         |                      |
|                                  | Q1-Q3  | 13.3-20.8       | .-.       |                      |
| <b>PINP (pg/ml)</b>              |        |                 |           |                      |
| PINP (pg/ml) at baseline         | n      | 9               | 15        | <b>0,049</b>         |

|                            |        |             |             |        |
|----------------------------|--------|-------------|-------------|--------|
|                            | Median | 654,2       | 362,7       |        |
|                            | Q1-Q3  | 572.8-750.7 | 215.8-733.1 |        |
| PINP (pg/ml) at 2 Months   | n      | 5           | 12          | 0,958  |
|                            | Median | 569,4       | 384,6       |        |
|                            | Q1-Q3  | 226.3-710.7 | 204.2-897.9 |        |
| PINP (pg/ml) at 4 Months   | n      | 3           | 8           | >0.999 |
|                            | Median | 514,2       | 474,8       |        |
|                            | Q1-Q3  | 278.5-777.5 | 425.4-1084  |        |
| PINP (pg/ml) at 6 Months   | n      | 3           | 6           | 0,519  |
|                            | Median | 698,7       | 429,5       |        |
|                            | Q1-Q3  | 442.8-789.0 | 397.8-1694  |        |
| PINP (pg/ml) at 8 Months   | n      | 3           | 5           | 0,371  |
|                            | Median | 1004        | 541,1       |        |
|                            | Q1-Q3  | 765.5-3505  | 381.1-1988  |        |
| PINP (pg/ml) at 10 Months  | n      | 3           | 4           | 0,216  |
|                            | Median | 1261        | 503,3       |        |
|                            | Q1-Q3  | 652.0-3650  | 391.7-1563  |        |
| PINP (pg/ml) at 12 Months  | n      | 2           | 0           |        |
|                            | Median | 992,5       | .           |        |
|                            | Q1-Q3  | 701.3-1284  | .-.         |        |
| <b>CTX(ng/ml)</b>          |        |             |             |        |
| CTX(ng/ml) at baseline     | n      | 9           | 15          | 0,404  |
|                            | Median | 0,8         | 0,7         |        |
|                            | Q1-Q3  | 0.6-1.2     | 0.2-0.9     |        |
| CTX(ng/ml) at 2 Months     | n      | 5           | 12          | 0,874  |
|                            | Median | 0,3         | 0,4         |        |
|                            | Q1-Q3  | 0.2-0.5     | 0.2-0.6     |        |
| CTX(ng/ml) at 4 Months     | n      | 3           | 8           | 0,759  |
|                            | Median | 0,2         | 0,3         |        |
|                            | Q1-Q3  | 0.2-0.7     | 0.2-0.4     |        |
| CTX(ng/ml) at 6 Months     | n      | 3           | 6           | 0,519  |
|                            | Median | 0,4         | 0,2         |        |
|                            | Q1-Q3  | 0.1-0.7     | 0.2-0.3     |        |
| CTX(ng/ml) at 8 Months     | n      | 3           | 5           | >0.999 |
|                            | Median | 0,3         | 0,1         |        |
|                            | Q1-Q3  | 0.0-0.5     | 0.1-0.2     |        |
| CTX(ng/ml) at 10 Months    | n      | 3           | 4           | 0,596  |
|                            | Median | 0,3         | 0,2         |        |
|                            | Q1-Q3  | 0.1-0.4     | 0.1-0.2     |        |
| CTX(ng/ml) at 12 Months    | n      | 2           | 0           |        |
|                            | Median | 0,3         | .           |        |
|                            | Q1-Q3  | 0.2-0.4     | .-.         |        |
| <b>TRACP-5B (U/L)</b>      |        |             |             |        |
| TRACP-5B (U/L) at baseline | n      | 9           | 15          | 0,283  |
|                            | Median | 3,6         | 3,3         |        |
|                            | Q1-Q3  | 1.9-4.8     | 1.5-3.7     |        |
| TRACP-5B (U/L) at 2 Months | n      | 5           | 12          | 0,874  |
|                            | Median | 1,9         | 1,9         |        |
|                            | Q1-Q3  | 1.7-2.0     | 0.7-2.2     |        |
| TRACP-5B (U/L) at 4 Months | n      | 3           | 8           | 0,61   |

|                             |                |          |         |        |
|-----------------------------|----------------|----------|---------|--------|
| TRACP-5B (U/L) at 6 Months  | Median         | 1,9      | 1,2     | 0,519  |
|                             | Q1-Q3          | 1.0-2.0  | 0.7-1.7 |        |
|                             | n              | 3        | 6       |        |
|                             | Median         | 1,7      | 1,2     |        |
| TRACP-5B (U/L) at 8 Months  | Q1-Q3          | 1.1-15.9 | 1.0-1.9 | >0.999 |
|                             | n              | 3        | 5       |        |
|                             | Median         | 0,9      | 1       |        |
|                             | Q1-Q3          | 0.8-2.2  | 1.0-1.0 |        |
| TRACP-5B (U/L) at 10 Months | n              | 2        | 3       | 0,773  |
|                             | Median         | 1,4      | 0,9     |        |
|                             | Q1-Q3          | 0.9-2.0  | 0.8-0.9 |        |
|                             | n              | 2        | 0       |        |
| TRACP-5B (U/L) at 12 Months | Median         | 1,3      | .       |        |
|                             | Q1-Q3          | 0.9-1.8  | .-.     |        |
|                             | RANKL (pmol/L) |          |         |        |
|                             | n              | 9        | 15      |        |
| RANKL (pmol/L) at baseline  | Median         | 0,3      | 0,2     | 0,551  |
|                             | Q1-Q3          | 0.2-0.4  | 0.1-0.4 |        |
|                             | n              | 5        | 12      |        |
|                             | Median         | 0,2      | 0,2     |        |
| RANKL (pmol/L) at 2 Months  | Q1-Q3          | 0.1-0.2  | 0.1-0.2 | 0,958  |
|                             | n              | 3        | 8       |        |
|                             | Median         | 0,1      | 0,1     |        |
|                             | Q1-Q3          | 0.1-0.2  | 0.1-0.1 |        |
| RANKL (pmol/L) at 4 Months  | n              | 3        | 6       | 0,093  |
|                             | Median         | 0,2      | 0,1     |        |
|                             | Q1-Q3          | 0.1-0.2  | 0.1-0.1 |        |
|                             | n              | 3        | 5       |        |
| RANKL (pmol/L) at 6 Months  | Median         | 0,1      | 0,1     | 0,766  |
|                             | Q1-Q3          | 0.1-0.2  | 0.0-0.1 |        |
|                             | n              | 3        | 4       |        |
|                             | Median         | 0,1      | 0,1     |        |
| RANKL (pmol/L) at 8 Months  | Q1-Q3          | 0.1-0.3  | 0.0-0.1 | 0,596  |
|                             | n              | 2        | 0       |        |
|                             | Median         | 0,1      | .       |        |
|                             | Q1-Q3          | 0.1-0.2  | .-.     |        |
| RANKL/OPG ratio             |                |          |         |        |
| RANKL/OPG ratio at baseline | n              | 9        | 15      | 0,633  |
|                             | Median         | 0,1      | 0,1     |        |
|                             | Q1-Q3          | 0.0-0.1  | 0.0-0.1 |        |
|                             | n              | 5        | 12      |        |
| RANKL/OPG ratio at 2 Months | Median         | 0        | 0       | 0,792  |
|                             | Q1-Q3          | 0.0-0.1  | 0.0-0.0 |        |
|                             | n              | 3        | 8       |        |
|                             | Median         | 0        | 0       |        |
| RANKL/OPG ratio at 4 Months | Q1-Q3          | 0.0-0.0  | 0.0-0.0 | 0,475  |
|                             | n              | 3        | 6       |        |
|                             | Median         | 0        | 0       |        |
|                             | Q1-Q3          | 0.0-0.0  | 0.0-0.0 |        |
| RANKL/OPG ratio at 6 Months | n              | 3        | 5       | 0,245  |
|                             | Median         | 0        | 0       |        |
|                             | Q1-Q3          | 0.0-0.0  | 0.0-0.0 |        |
|                             | n              | 3        | 5       |        |
| RANKL/OPG ratio at 8 Months |                |          |         | >0.999 |

|                              |        |            |           |       |
|------------------------------|--------|------------|-----------|-------|
|                              | Median | 0          | 0         |       |
|                              | Q1-Q3  | 0.0-0.0    | 0.0-0.0   |       |
| RANKL/OPG ratio at 10 Months | n      | 3          | 4         | 0,377 |
|                              | Median | 0          | 0         |       |
|                              | Q1-Q3  | 0.0-0.1    | 0.0-0.0   |       |
| RANKL/OPG ratio at 12 Months | n      | 2          | 0         |       |
|                              | Median | 0          | .         |       |
|                              | Q1-Q3  | 0.0-0.0    | .-.       |       |
| <b>SOST (pmol/L)</b>         |        |            |           |       |
| SOST (pmol/L) at baseline    | n      | 9          | 15        | 0,107 |
|                              | Median | 64,1       | 40,2      |       |
|                              | Q1-Q3  | 44.8-66.3  | 37.7-62.9 |       |
| SOST (pmol/L) at 2 Months    | n      | 5          | 12        | 0,712 |
|                              | Median | 38,2       | 36,7      |       |
|                              | Q1-Q3  | 34.0-40.1  | 25.0-45.0 |       |
| SOST (pmol/L) at 4 Months    | n      | 3          | 8         | 0,083 |
|                              | Median | 45,8       | 31,2      |       |
|                              | Q1-Q3  | 43.3-77.1  | 23.9-35.0 |       |
| SOST (pmol/L) at 6 Months    | n      | 3          | 6         | 0,245 |
|                              | Median | 48,1       | 25,6      |       |
|                              | Q1-Q3  | 31.8-149.6 | 22.9-63.1 |       |
| SOST (pmol/L) at 8 Months    | n      | 3          | 5         | 0,766 |
|                              | Median | 29,9       | 26,2      |       |
|                              | Q1-Q3  | 23.5-63.5  | 21.2-44.3 |       |
| SOST (pmol/L) at 10 Months   | n      | 3          | 4         | 0,596 |
|                              | Median | 36,9       | 30,4      |       |
|                              | Q1-Q3  | 21.1-82.1  | 19.8-52.6 |       |
| SOST (pmol/L) at 12 Months   | n      | 2          | 0         |       |
|                              | Median | 27,8       | .         |       |
|                              | Q1-Q3  | 20.0-35.7  | .-.       |       |
| <b>Dkk1 (pmol/L)</b>         |        |            |           |       |
| Dkk1 (pmol/L) at baseline    | n      | 9          | 15        | 0,591 |
|                              | Median | 35,5       | 43        |       |
|                              | Q1-Q3  | 25.1-52.4  | 31.4-75.9 |       |
| Dkk1 (pmol/L) at 2 Months    | n      | 5          | 12        | 0,712 |
|                              | Median | 55,3       | 34,1      |       |
|                              | Q1-Q3  | 24.4-58.4  | 27.8-69.8 |       |
| Dkk1 (pmol/L) at 4 Months    | n      | 3          | 8         | 0,358 |
|                              | Median | 57,5       | 25,3      |       |
|                              | Q1-Q3  | 33.7-58.4  | 17.2-54.7 |       |
| Dkk1 (pmol/L) at 6 Months    | n      | 3          | 6         | 0,699 |
|                              | Median | 39,7       | 35,5      |       |
|                              | Q1-Q3  | 21.2-54.8  | 32.0-49.2 |       |
| Dkk1 (pmol/L) at 8 Months    | n      | 3          | 5         | 0,766 |
|                              | Median | 28,2       | 29,7      |       |
|                              | Q1-Q3  | 19.2-31.0  | 23.8-34.4 |       |
| Dkk1 (pmol/L) at 10 Months   | n      | 3          | 4         | 0,377 |
|                              | Median | 16,3       | 29,8      |       |
|                              | Q1-Q3  | 9.1-26.1   | 18.5-34.9 |       |
| Dkk1 (pmol/L) at 12 Months   | n      | 2          | 0         |       |

|                                |                          |             |             |        |
|--------------------------------|--------------------------|-------------|-------------|--------|
|                                | Median                   | 14,4        | .           |        |
|                                | Q1-Q3                    | 8.4-20.4    | .-.         |        |
|                                | <b>activin-A (pg/ml)</b> |             |             |        |
| activin-A (pg/ml) at baseline  | n                        | 9           | 15          | 0,858  |
|                                | Median                   | 667,9       | 636,1       |        |
|                                | Q1-Q3                    | 548.3-902.7 | 492.3-913.5 |        |
| activin-A (pg/ml) at 2 Months  | n                        | 5           | 12          | 0,874  |
|                                | Median                   | 447,5       | 469,8       |        |
|                                | Q1-Q3                    | 321.0-517.7 | 374.3-550.3 |        |
| activin-A (pg/ml) at 4 Months  | n                        | 3           | 8           | 0,358  |
|                                | Median                   | 468,3       | 384         |        |
|                                | Q1-Q3                    | 418.7-580.9 | 279.0-506.1 |        |
| activin-A (pg/ml) at 6 Months  | n                        | 3           | 6           | 0,897  |
|                                | Median                   | 366,9       | 383,5       |        |
|                                | Q1-Q3                    | 300.0-695.8 | 372.6-504.5 |        |
| activin-A (pg/ml) at 8 Months  | n                        | 3           | 5           | 0,766  |
|                                | Median                   | 418,4       | 365,7       |        |
|                                | Q1-Q3                    | 213.5-439.0 | 319.0-537.9 |        |
| activin-A (pg/ml) at 10 Months | n                        | 3           | 4           | 0,596  |
|                                | Median                   | 362,8       | 320,7       |        |
|                                | Q1-Q3                    | 280.5-467.5 | 242.4-390.1 |        |
| activin-A (pg/ml) at 12 Months | n                        | 2           | 0           |        |
|                                | Median                   | 287,5       | .           |        |
|                                | Q1-Q3                    | 256.8-318.2 | .-.         |        |
|                                | <b>CCL3 (ng/ml)</b>      |             |             |        |
| CCL3 (ng/ml) at baseline       | n                        | 9           | 15          | 0,512  |
|                                | Median                   | 76,6        | 80,3        |        |
|                                | Q1-Q3                    | 72.4-94.8   | 22.8-88.5   |        |
| CCL3 (ng/ml) at 2 Months       | n                        | 5           | 12          | 0,429  |
|                                | Median                   | 83,2        | 68,9        |        |
|                                | Q1-Q3                    | 44.0-102.7  | 42.3-82.9   |        |
| CCL3 (ng/ml) at 4 Months       | n                        | 3           | 8           | 0,083  |
|                                | Median                   | 34,3        | 68,8        |        |
|                                | Q1-Q3                    | 32.8-68.0   | 62.3-77.5   |        |
| CCL3 (ng/ml) at 6 Months       | n                        | 3           | 6           | 0,156  |
|                                | Median                   | 54          | 66,6        |        |
|                                | Q1-Q3                    | 6.3-67.4    | 61.3-73.1   |        |
| CCL3 (ng/ml) at 8 Months       | n                        | 3           | 5           | 0,233  |
|                                | Median                   | 54,3        | 63,5        |        |
|                                | Q1-Q3                    | 8.7-61.1    | 55.1-66.9   |        |
| CCL3 (ng/ml) at 10 Months      | n                        | 3           | 4           | >0.999 |
|                                | Median                   | 14,2        | 53,3        |        |
|                                | Q1-Q3                    | 9.1-60.8    | 27.0-57.0   |        |
| CCL3 (ng/ml) at 12 Months      | n                        | 2           | 0           |        |
|                                | Median                   | 34,1        | .           |        |
|                                | Q1-Q3                    | 3.9-64.3    | .-.         |        |

<sup>a</sup> Mann-Whitney U-test

Table S16. Biomarker values at each timepoint, by SREs occurrence during study

|                                 |        | SREs during study |           |                      |
|---------------------------------|--------|-------------------|-----------|----------------------|
|                                 |        | Yes               | No        |                      |
|                                 |        | n (%)             | n (%)     | p-value <sup>a</sup> |
| bALP (µg/L)                     |        |                   |           |                      |
| bALP (µg/L) at baseline         | n      | 6                 | 18        | 0,868                |
|                                 | Median | 10,7              | 10,9      |                      |
|                                 | Q1-Q3  | 10.0-11.7         | 8.9-11.7  |                      |
| bALP (µg/L) at 2 Months         | n      | 5                 | 12        | 0,102                |
|                                 | Median | 15,4              | 10,9      |                      |
|                                 | Q1-Q3  | 12.8-17.5         | 7.9-12.6  |                      |
| bALP (µg/L) at 4 Months         | n      | 3                 | 8         | 0,919                |
|                                 | Median | 10,8              | 11,7      |                      |
|                                 | Q1-Q3  | 8.9-28.2          | 10.2-13.5 |                      |
| bALP (µg/L) at 6 Months         | n      | 3                 | 6         | 0,245                |
|                                 | Median | 7,1               | 13,7      |                      |
|                                 | Q1-Q3  | 6.8-14.8          | 11.6-14.8 |                      |
| bALP (µg/L) at 8 Months         | n      | 3                 | 5         | 0,371                |
|                                 | Median | 6,8               | 16,9      |                      |
|                                 | Q1-Q3  | 5.6-16.9          | 15.0-18.0 |                      |
| bALP (µg/L) at 10 Months        | n      | 3                 | 4         | 0,377                |
|                                 | Median | 9,8               | 16,6      |                      |
|                                 | Q1-Q3  | 5.9-15.8          | 11.0-19.0 |                      |
| bALP (µg/L) at 12 Months        | n      | 1                 | 1         |                      |
|                                 | Median | 19,7              | 14,5      |                      |
|                                 | Q1-Q3  | 19.7-19.7         | 14.5-14.5 |                      |
| Osteocalcin (ng/ml)             |        |                   |           |                      |
| Osteocalcin (ng/ml) at baseline | n      | 6                 | 18        | 0,764                |
|                                 | Median | 7,2               | 9,5       |                      |
|                                 | Q1-Q3  | 3.9-11.9          | 6.4-11.2  |                      |
| Osteocalcin (ng/ml) at 2 Months | n      | 5                 | 12        | 0,429                |
|                                 | Median | 9,4               | 11,4      |                      |
|                                 | Q1-Q3  | 5.8-10.9          | 9.1-14.5  |                      |
| Osteocalcin (ng/ml) at 4 Months | n      | 3                 | 8         | 0,919                |
|                                 | Median | 12,4              | 14,7      |                      |
|                                 | Q1-Q3  | 9.9-17.7          | 9.9-19.3  |                      |
| Osteocalcin (ng/ml) at 6 Months | n      | 3                 | 6         | 0,156                |
|                                 | Median | 11,1              | 17,5      |                      |

|                                  |        |             |             |        |
|----------------------------------|--------|-------------|-------------|--------|
|                                  | Q1-Q3  | 10.8-12.8   | 13.9-25.4   |        |
| Osteocalcin (ng/ml) at 8 Months  | n      | 3           | 5           | 0,136  |
|                                  | Median | 8,5         | 17,8        |        |
|                                  | Q1-Q3  | 5.6-14.9    | 16.9-29.8   |        |
| Osteocalcin (ng/ml) at 10 Months | n      | 3           | 4           | 0,377  |
|                                  | Median | 8,9         | 18,7        |        |
|                                  | Q1-Q3  | 3.8-16.8    | 10.2-23.9   |        |
| Osteocalcin (ng/ml) at 12 Months | n      | 1           | 1           |        |
|                                  | Median | 13,3        | 20,8        |        |
|                                  | Q1-Q3  | 13.3-13.3   | 20.8-20.8   |        |
| <b>PINP (pg/ml)</b>              |        |             |             |        |
| PINP (pg/ml) at baseline         | n      | 6           | 18          | 0,134  |
|                                  | Median | 662,6       | 477,8       |        |
|                                  | Q1-Q3  | 547.4-781.6 | 253.1-733.1 |        |
| PINP (pg/ml) at 2 Months         | n      | 5           | 12          | 0,317  |
|                                  | Median | 226,3       | 467,8       |        |
|                                  | Q1-Q3  | 139.5-710.7 | 281.4-777.4 |        |
| PINP (pg/ml) at 4 Months         | n      | 3           | 8           | 0,475  |
|                                  | Median | 411,6       | 502,2       |        |
|                                  | Q1-Q3  | 278.5-777.5 | 449.4-1084  |        |
| PINP (pg/ml) at 6 Months         | n      | 3           | 6           | 0,699  |
|                                  | Median | 442,8       | 614,1       |        |
|                                  | Q1-Q3  | 397.8-698.7 | 419.7-1694  |        |
| PINP (pg/ml) at 8 Months         | n      | 3           | 5           | >0.999 |
|                                  | Median | 765,5       | 1004        |        |
|                                  | Q1-Q3  | 381.1-3505  | 541.1-1988  |        |
| PINP (pg/ml) at 10 Months        | n      | 3           | 4           | >0.999 |
|                                  | Median | 652         | 910,1       |        |
|                                  | Q1-Q3  | 335.8-3650  | 503.3-1914  |        |
| PINP (pg/ml) at 12 Months        | n      | 1           | 1           |        |
|                                  | Median | 701,3       | 1284        |        |
|                                  | Q1-Q3  | 701.3-701.3 | 1284-1284   |        |
| <b>CTX(ng/ml)</b>                |        |             |             |        |
| CTX(ng/ml) at baseline           | n      | 6           | 18          | 0,92   |
|                                  | Median | 0,8         | 0,7         |        |
|                                  | Q1-Q3  | 0.2-1.3     | 0.3-0.9     |        |
| CTX(ng/ml) at 2 Months           | n      | 5           | 12          | 0,46   |

|                             |        |          |         |        |
|-----------------------------|--------|----------|---------|--------|
| CTX(ng/ml) at 4 Months      | Median | 0,2      | 0,4     | 0,919  |
|                             | Q1-Q3  | 0.1-0.6  | 0.3-0.6 |        |
|                             | n      | 3        | 8       |        |
| CTX(ng/ml) at 6 Months      | Median | 0,3      | 0,3     | 0,897  |
|                             | Q1-Q3  | 0.2-0.7  | 0.2-0.4 |        |
|                             | n      | 3        | 6       |        |
| CTX(ng/ml) at 8 Months      | Median | 0,2      | 0,2     | 0,371  |
|                             | Q1-Q3  | 0.1-0.7  | 0.2-0.4 |        |
|                             | n      | 3        | 5       |        |
| CTX(ng/ml) at 10 Months     | Median | 0,1      | 0,2     | 0,596  |
|                             | Q1-Q3  | 0.0-0.5  | 0.1-0.3 |        |
|                             | n      | 3        | 4       |        |
| CTX(ng/ml) at 12 Months     | Median | 0,1      | 0,2     |        |
|                             | Q1-Q3  | 0.1-0.4  | 0.2-0.3 |        |
|                             | n      | 1        | 1       |        |
|                             | Median | 0,4      | 0,2     |        |
|                             | Q1-Q3  | 0.4-0.4  | 0.2-0.2 |        |
| <b>TRACP-5B (U/L)</b>       |        |          |         |        |
| TRACP-5B (U/L) at baseline  | Median | 3,7      | 2,7     | 0,301  |
|                             | Q1-Q3  | 2.7-4.3  | 1.6-3.9 |        |
|                             | n      | 6        | 18      |        |
| TRACP-5B (U/L) at 2 Months  | Median | 1,8      | 1,9     | 0,635  |
|                             | Q1-Q3  | 1.0-1.9  | 1.2-2.2 |        |
|                             | n      | 5        | 12      |        |
| TRACP-5B (U/L) at 4 Months  | Median | 1        | 1,2     | 0,61   |
|                             | Q1-Q3  | 0.7-2.0  | 1.0-2.0 |        |
|                             | n      | 3        | 8       |        |
| TRACP-5B (U/L) at 6 Months  | Median | 1,1      | 1,5     | 0,699  |
|                             | Q1-Q3  | 0.9-15.9 | 1.2-1.9 |        |
|                             | n      | 3        | 6       |        |
| TRACP-5B (U/L) at 8 Months  | Median | 1,1      | 1       | 0,371  |
|                             | Q1-Q3  | 0.8-2.2  | 0.9-1.0 |        |
|                             | n      | 3        | 5       |        |
| TRACP-5B (U/L) at 10 Months | Median | 1,4      | 0,9     | >0.999 |
|                             | Q1-Q3  | 0.8-2.0  | 0.9-0.9 |        |
|                             | n      | 2        | 3       |        |
| TRACP-5B (U/L) at 12 Months | Median | 1,4      | 0,9     |        |
|                             | n      | 1        | 1       |        |



|                             |                        |         |         |       |
|-----------------------------|------------------------|---------|---------|-------|
|                             | Median                 | 1,8     | 0,9     |       |
|                             | Q1-Q3                  | 1.8-1.8 | 0.9-0.9 |       |
|                             | <b>RANKL (pmol/L)</b>  |         |         |       |
| RANKL (pmol/L) at baseline  | n                      | 6       | 18      | 0,194 |
|                             | Median                 | 0,5     | 0,2     |       |
|                             | Q1-Q3                  | 0.2-0.5 | 0.1-0.4 |       |
| RANKL (pmol/L) at 2 Months  | n                      | 5       | 12      | 0,493 |
|                             | Median                 | 0,1     | 0,2     |       |
|                             | Q1-Q3                  | 0.1-0.2 | 0.2-0.2 |       |
| RANKL (pmol/L) at 4 Months  | n                      | 3       | 8       | 0,475 |
|                             | Median                 | 0,1     | 0,1     |       |
|                             | Q1-Q3                  | 0.1-0.2 | 0.1-0.1 |       |
| RANKL (pmol/L) at 6 Months  | n                      | 3       | 6       | 0,053 |
|                             | Median                 | 0,2     | 0,1     |       |
|                             | Q1-Q3                  | 0.1-0.2 | 0.1-0.1 |       |
| RANKL (pmol/L) at 8 Months  | n                      | 3       | 5       | 0,233 |
|                             | Median                 | 0,1     | 0,1     |       |
|                             | Q1-Q3                  | 0.1-0.2 | 0.0-0.1 |       |
| RANKL (pmol/L) at 10 Months | n                      | 3       | 4       | 0,216 |
|                             | Median                 | 0,2     | 0       |       |
|                             | Q1-Q3                  | 0.1-0.3 | 0.0-0.1 |       |
| RANKL (pmol/L) at 12 Months | n                      | 1       | 1       |       |
|                             | Median                 | 0,2     | 0,1     |       |
|                             | Q1-Q3                  | 0.2-0.2 | 0.1-0.1 |       |
|                             | <b>RANKL/OPG ratio</b> |         |         |       |
| RANKL/OPG ratio at baseline | n                      | 6       | 18      | 0,301 |
|                             | Median                 | 0,1     | 0,1     |       |
|                             | Q1-Q3                  | 0.0-0.1 | 0.0-0.1 |       |
| RANKL/OPG ratio at 2 Months | n                      | 5       | 12      | 0,562 |
|                             | Median                 | 0       | 0       |       |
|                             | Q1-Q3                  | 0.0-0.0 | 0.0-0.0 |       |
| RANKL/OPG ratio at 4 Months | n                      | 3       | 8       | 0,358 |
|                             | Median                 | 0       | 0       |       |
|                             | Q1-Q3                  | 0.0-0.0 | 0.0-0.0 |       |
| RANKL/OPG ratio at 6 Months | n                      | 3       | 6       | 0,093 |
|                             | Median                 | 0       | 0       |       |
|                             | Q1-Q3                  | 0.0-0.0 | 0.0-0.0 |       |

|                              |        |            |           |       |
|------------------------------|--------|------------|-----------|-------|
| RANKL/OPG ratio at 8 Months  | n      | 3          | 5         | 0,371 |
|                              | Median | 0          | 0         |       |
|                              | Q1-Q3  | 0.0-0.0    | 0.0-0.0   |       |
| RANKL/OPG ratio at 10 Months | n      | 3          | 4         | 0,052 |
|                              | Median | 0          | 0         |       |
|                              | Q1-Q3  | 0.0-0.1    | 0.0-0.0   |       |
| RANKL/OPG ratio at 12 Months | n      | 1          | 1         |       |
|                              | Median | 0          | 0         |       |
|                              | Q1-Q3  | 0.0-0.0    | 0.0-0.0   |       |
| SOST (pmol/L)                |        |            |           |       |
| SOST (pmol/L) at baseline    | n      | 6          | 18        | 0,243 |
|                              | Median | 64,4       | 43,3      |       |
|                              | Q1-Q3  | 39.4-66.3  | 37.7-62.9 |       |
| SOST (pmol/L) at 2 Months    | n      | 5          | 12        | 0,188 |
|                              | Median | 40,7       | 35,1      |       |
|                              | Q1-Q3  | 40.1-49.7  | 28.7-40.0 |       |
| SOST (pmol/L) at 4 Months    | n      | 3          | 8         | 0,358 |
|                              | Median | 45,8       | 33        |       |
|                              | Q1-Q3  | 29.7-77.1  | 23.9-40.0 |       |
| SOST (pmol/L) at 6 Months    | n      | 3          | 6         | 0,053 |
|                              | Median | 92,9       | 25,6      |       |
|                              | Q1-Q3  | 48.1-149.6 | 22.9-31.8 |       |
| SOST (pmol/L) at 8 Months    | n      | 3          | 5         | 0,074 |
|                              | Median | 63,5       | 23,5      |       |
|                              | Q1-Q3  | 29.9-113.2 | 21.2-26.2 |       |
| SOST (pmol/L) at 10 Months   | n      | 3          | 4         | 0,216 |
|                              | Median | 40,5       | 20,7      |       |
|                              | Q1-Q3  | 36.9-82.1  | 19.8-42.9 |       |
| SOST (pmol/L) at 12 Months   | n      | 1          | 1         |       |
|                              | Median | 35,7       | 20        |       |
|                              | Q1-Q3  | 35.7-35.7  | 20.0-20.0 |       |
| Dkk1 (pmol/L)                |        |            |           |       |
| Dkk1 (pmol/L) at baseline    | n      | 6          | 18        | 0,077 |
|                              | Median | 61,8       | 37,7      |       |
|                              | Q1-Q3  | 43.0-80.8  | 21.2-52.4 |       |
| Dkk1 (pmol/L) at 2 Months    | n      | 5          | 12        | 0,225 |
|                              | Median | 58.4       | 30.2      |       |

|                                |                          |             |             |        |
|--------------------------------|--------------------------|-------------|-------------|--------|
|                                | Q1-Q3                    | 55.3-67.5   | 24.2-52.3   |        |
| Dkk1 (pmol/L) at 4 Months      | n                        | 3           | 8           | 0,919  |
|                                | Median                   | 33,7        | 37,2        |        |
|                                | Q1-Q3                    | 18.5-57.5   | 19.3-60.7   |        |
| Dkk1 (pmol/L) at 6 Months      | n                        | 3           | 6           | 0,245  |
|                                | Median                   | 39,7        | 33          |        |
|                                | Q1-Q3                    | 37.0-54.8   | 21.2-49.2   |        |
| Dkk1 (pmol/L) at 8 Months      | n                        | 3           | 5           | >0.999 |
|                                | Median                   | 28,2        | 29,7        |        |
|                                | Q1-Q3                    | 23.8-31.0   | 19.2-34.4   |        |
| Dkk1 (pmol/L) at 10 Months     | n                        | 3           | 4           | 0,216  |
|                                | Median                   | 16,3        | 29,8        |        |
|                                | Q1-Q3                    | 8.4-26.1    | 18.9-34.9   |        |
| Dkk1 (pmol/L) at 12 Months     | n                        | 1           | 1           |        |
|                                | Median                   | 20,4        | 8,4         |        |
|                                | Q1-Q3                    | 20.4-20.4   | 8.4-8.4     |        |
|                                | <b>activin-A (pg/ml)</b> |             |             |        |
| activin-A (pg/ml) at baseline  | n                        | 6           | 18          | 0,714  |
|                                | Median                   | 586,5       | 665,2       |        |
|                                | Q1-Q3                    | 421.1-921.2 | 524.9-902.7 |        |
| activin-A (pg/ml) at 2 Months  | n                        | 5           | 12          | 0,317  |
|                                | Median                   | 562,2       | 454,8       |        |
|                                | Q1-Q3                    | 390.4-786.7 | 339.6-503.1 |        |
| activin-A (pg/ml) at 4 Months  | n                        | 3           | 8           | 0,262  |
|                                | Median                   | 468,3       | 384         |        |
|                                | Q1-Q3                    | 418.7-904.7 | 279.0-506.1 |        |
| activin-A (pg/ml) at 6 Months  | n                        | 3           | 6           | 0,245  |
|                                | Median                   | 593,8       | 375,7       |        |
|                                | Q1-Q3                    | 366.9-695.8 | 300.0-388.3 |        |
| activin-A (pg/ml) at 8 Months  | n                        | 3           | 5           | 0,136  |
|                                | Median                   | 439         | 319         |        |
|                                | Q1-Q3                    | 418.4-982.7 | 231.9-365.7 |        |
| activin-A (pg/ml) at 10 Months | n                        | 3           | 4           | 0,377  |
|                                | Median                   | 422,7       | 320,7       |        |
|                                | Q1-Q3                    | 280.5-467.5 | 242.4-360.2 |        |
| activin-A (pg/ml) at 12 Months | n                        | 1           | 1           |        |
|                                | Median                   | 318,2       | 256,8       |        |

|                           | Q1-Q3               | 318.2-318.2 | 256.8-256.8 |              |
|---------------------------|---------------------|-------------|-------------|--------------|
|                           | <b>CCL3 (ng/ml)</b> |             |             |              |
| CCL3 (ng/ml) at baseline  | n                   | 6           | 18          | 0,194        |
|                           | Median              | 71,7        | 80,8        |              |
|                           | Q1-Q3               | 62.2-79.0   | 61.3-98.9   |              |
| CCL3 (ng/ml) at 2 Months  | n                   | 5           | 12          | 0,874        |
|                           | Median              | 61,2        | 70,8        |              |
|                           | Q1-Q3               | 45.7-102.7  | 41.5-86.3   |              |
| CCL3 (ng/ml) at 4 Months  | n                   | 3           | 8           | 0,185        |
|                           | Median              | 47          | 68,8        |              |
|                           | Q1-Q3               | 34.3-68.0   | 62.3-77.5   |              |
| CCL3 (ng/ml) at 6 Months  | n                   | 3           | 6           | <b>0,028</b> |
|                           | Median              | 54          | 69,3        |              |
|                           | Q1-Q3               | 6.3-61.2    | 62.1-73.1   |              |
| CCL3 (ng/ml) at 8 Months  | n                   | 3           | 5           | 0,136        |
|                           | Median              | 21,1        | 63,5        |              |
|                           | Q1-Q3               | 8.7-61.1    | 55.1-66.9   |              |
| CCL3 (ng/ml) at 10 Months | n                   | 3           | 4           | 0,052        |
|                           | Median              | 9,1         | 57          |              |
|                           | Q1-Q3               | 3.3-14.2    | 53.3-59.3   |              |
| CCL3 (ng/ml) at 12 Months | n                   | 1           | 1           |              |
|                           | Median              | 3,9         | 64,3        |              |
|                           | Q1-Q3               | 3.9-3.9     | 64.3-64.3   |              |

---

<sup>a</sup> Mann-Whitney U-test

Table S17. Biomarker values at each timepoint in patients with and without disease progression

|                                  |        | PD        |           |                      |
|----------------------------------|--------|-----------|-----------|----------------------|
|                                  |        | Yes       | No        |                      |
|                                  |        | n (%)     | n (%)     | p-value <sup>a</sup> |
| bALP (µg/L)                      |        |           |           |                      |
| bALP (µg/L) at baseline          | n      | 12        | 12        | 0,403                |
|                                  | Median | 10,6      | 11,3      |                      |
|                                  | Q1-Q3  | 8.3-11.6  | 10.2-11.7 |                      |
| bALP (µg/L) at 2 Months          | n      | 10        | 7         | 0,733                |
|                                  | Median | 11,1      | 12,9      |                      |
|                                  | Q1-Q3  | 9.1-12.8  | 7.8-17.5  |                      |
| bALP (µg/L) at 4 Months          | n      | 6         | 5         | 0,927                |
|                                  | Median | 11,4      | 11,9      |                      |
|                                  | Q1-Q3  | 10.8-12.9 | 9.1-14.1  |                      |
| bALP (µg/L) at 6 Months          | n      | 4         | 5         | >0.999               |
|                                  | Median | 13,7      | 11,6      |                      |
|                                  | Q1-Q3  | 10.3-14.3 | 8.1-14.8  |                      |
| bALP (µg/L) at 8 Months          | n      | 4         | 4         | >0.999               |
|                                  | Median | 16        | 11,8      |                      |
|                                  | Q1-Q3  | 10.9-16.9 | 4.7-18.8  |                      |
| bALP (µg/L) at 10 Months         | n      | 4         | 3         | 0,596                |
|                                  | Median | 15,4      | 7         |                      |
|                                  | Q1-Q3  | 12.4-16.9 | 5.9-20.0  |                      |
| bALP (µg/L) at 12 Months         | n      | 2         | 0         |                      |
|                                  | Median | 17,1      | .         |                      |
|                                  | Q1-Q3  | 14.5-19.7 | .-.       |                      |
| Osteocalcin (ng/ml)              |        |           |           |                      |
| Osteocalcin (ng/ml) at baseline  | n      | 12        | 12        | 0,795                |
|                                  | Median | 8,3       | 9,5       |                      |
|                                  | Q1-Q3  | 5.5-11.6  | 4.7-10.8  |                      |
| Osteocalcin (ng/ml) at 2 Months  | n      | 10        | 7         | 0,157                |
|                                  | Median | 12,5      | 9,4       |                      |
|                                  | Q1-Q3  | 9.4-14.9  | 2.0-12.2  |                      |
| Osteocalcin (ng/ml) at 4 Months  | n      | 6         | 5         | 0,648                |
|                                  | Median | 12,4      | 17,2      |                      |
|                                  | Q1-Q3  | 8.6-17.7  | 11.2-19.2 |                      |
| Osteocalcin (ng/ml) at 6 Months  | n      | 4         | 5         | >0.999               |
|                                  | Median | 14,5      | 13,9      |                      |
|                                  | Q1-Q3  | 11.8-20.8 | 11.1-18.9 |                      |
| Osteocalcin (ng/ml) at 8 Months  | n      | 4         | 4         | >0.999               |
|                                  | Median | 16,4      | 12,7      |                      |
|                                  | Q1-Q3  | 10.3-23.8 | 7.3-28.5  |                      |
| Osteocalcin (ng/ml) at 10 Months | n      | 4         | 3         | 0,377                |
|                                  | Median | 17,2      | 3,8       |                      |
|                                  | Q1-Q3  | 12.8-23.0 | 2.8-19.7  |                      |
| Osteocalcin (ng/ml) at 12 Months | n      | 2         | 0         |                      |
|                                  | Median | 17,1      | .         |                      |
|                                  | Q1-Q3  | 13.3-20.8 | .-.       |                      |
| PINP (pg/ml)                     |        |           |           |                      |
| PINP (pg/ml) at baseline         | n      | 12        | 12        | 0,544                |

|                            |        |             |             |       |
|----------------------------|--------|-------------|-------------|-------|
|                            | Median | 507,6       | 554,9       |       |
|                            | Q1-Q3  | 254.0-702.4 | 304.0-761.8 |       |
| PINP (pg/ml) at 2 Months   | n      | 10          | 7           | 0,526 |
|                            | Median | 467,8       | 214,8       |       |
|                            | Q1-Q3  | 333.2-710.7 | 139.5-1048  |       |
| PINP (pg/ml) at 4 Months   | n      | 6           | 5           | 0,927 |
|                            | Median | 486,8       | 490,2       |       |
|                            | Q1-Q3  | 439.2-601.4 | 411.6-1567  |       |
| PINP (pg/ml) at 6 Months   | n      | 4           | 5           | 0,903 |
|                            | Median | 570,7       | 439,3       |       |
|                            | Q1-Q3  | 431.2-743.8 | 397.8-1694  |       |
| PINP (pg/ml) at 8 Months   | n      | 4           | 4           | 0,665 |
|                            | Median | 884,9       | 1185        |       |
|                            | Q1-Q3  | 653.3-2255  | 290.0-2072  |       |
| PINP (pg/ml) at 10 Months  | n      | 4           | 3           | 0,377 |
|                            | Median | 956,6       | 447,6       |       |
|                            | Q1-Q3  | 605.5-2456  | 335.8-2567  |       |
| PINP (pg/ml) at 12 Months  | n      | 2           | 0           |       |
|                            | Median | 992,5       | .           |       |
|                            | Q1-Q3  | 701.3-1284  | .-.         |       |
| <b>CTX(ng/ml)</b>          |        |             |             |       |
| CTX(ng/ml) at baseline     | n      | 12          | 12          | 0,751 |
|                            | Median | 0,7         | 0,7         |       |
|                            | Q1-Q3  | 0.4-0.9     | 0.2-0.9     |       |
| CTX(ng/ml) at 2 Months     | n      | 10          | 7           | 0,097 |
|                            | Median | 0,5         | 0,1         |       |
|                            | Q1-Q3  | 0.3-0.7     | 0.1-0.6     |       |
| CTX(ng/ml) at 4 Months     | n      | 6           | 5           | 0,315 |
|                            | Median | 0,4         | 0,3         |       |
|                            | Q1-Q3  | 0.2-0.7     | 0.2-0.3     |       |
| CTX(ng/ml) at 6 Months     | n      | 4           | 5           | 0,178 |
|                            | Median | 0,5         | 0,2         |       |
|                            | Q1-Q3  | 0.3-0.7     | 0.2-0.2     |       |
| CTX(ng/ml) at 8 Months     | n      | 4           | 4           | 0,312 |
|                            | Median | 0,4         | 0,1         |       |
|                            | Q1-Q3  | 0.2-0.5     | 0.1-0.1     |       |
| CTX(ng/ml) at 10 Months    | n      | 4           | 3           | 0,377 |
|                            | Median | 0,3         | 0,1         |       |
|                            | Q1-Q3  | 0.2-0.4     | 0.1-0.2     |       |
| CTX(ng/ml) at 12 Months    | n      | 2           | 0           |       |
|                            | Median | 0,3         | .           |       |
|                            | Q1-Q3  | 0.2-0.4     | .-.         |       |
| <b>TRACP-5B (U/L)</b>      |        |             |             |       |
| TRACP-5B (U/L) at baseline | n      | 12          | 12          | 0,977 |
|                            | Median | 3,6         | 3           |       |
|                            | Q1-Q3  | 1.5-4.0     | 1.9-4.3     |       |
| TRACP-5B (U/L) at 2 Months | n      | 10          | 7           | 0,884 |
|                            | Median | 1,9         | 1,8         |       |
|                            | Q1-Q3  | 1.0-2.0     | 0.7-3.1     |       |
| TRACP-5B (U/L) at 4 Months | n      | 6           | 5           | 0,784 |

|                             |                 |         |         |        |
|-----------------------------|-----------------|---------|---------|--------|
| TRACP-5B (U/L) at 6 Months  | Median          | 1,6     | 1,2     | 0,713  |
|                             | Q1-Q3           | 1.0-2.0 | 0.8-1.3 |        |
|                             | n               | 4       | 5       |        |
|                             | Median          | 1,4     | 1,3     |        |
| TRACP-5B (U/L) at 8 Months  | Q1-Q3           | 1.1-8.8 | 1.0-1.9 | 0,885  |
|                             | n               | 4       | 4       |        |
|                             | Median          | 1       | 1       |        |
|                             | Q1-Q3           | 0.9-1.6 | 0.8-1.1 |        |
| TRACP-5B (U/L) at 10 Months | n               | 3       | 2       | 0,386  |
|                             | Median          | 0,9     | 0,8     |        |
|                             | Q1-Q3           | 0.9-2.0 | 0.8-0.9 |        |
|                             | n               | 2       | 0       |        |
| TRACP-5B (U/L) at 12 Months | Median          | 1,3     | .       |        |
|                             | Q1-Q3           | 0.9-1.8 | .-.     |        |
|                             | RANKL (pmol/L)  |         |         |        |
|                             | n               | 12      | 12      |        |
| RANKL (pmol/L) at baseline  | Median          | 0,3     | 0,2     | 0,166  |
|                             | Q1-Q3           | 0.2-0.5 | 0.1-0.4 |        |
|                             | n               | 10      | 7       |        |
|                             | Median          | 0,2     | 0,1     |        |
| RANKL (pmol/L) at 2 Months  | Q1-Q3           | 0.2-0.2 | 0.1-0.2 | 0,223  |
|                             | n               | 6       | 5       |        |
|                             | Median          | 0,1     | 0,1     |        |
|                             | Q1-Q3           | 0.1-0.2 | 0.1-0.1 |        |
| RANKL (pmol/L) at 4 Months  | n               | 4       | 5       | >0.999 |
|                             | Median          | 0,1     | 0,1     |        |
|                             | Q1-Q3           | 0.1-0.2 | 0.1-0.1 |        |
|                             | n               | 4       | 5       |        |
| RANKL (pmol/L) at 6 Months  | Median          | 0,1     | 0,1     | 0,540  |
|                             | Q1-Q3           | 0.1-0.2 | 0.1-0.1 |        |
|                             | n               | 4       | 4       |        |
|                             | Median          | 0,1     | 0,1     |        |
| RANKL (pmol/L) at 8 Months  | Q1-Q3           | 0.1-0.1 | 0.1-0.1 | 0,885  |
|                             | n               | 4       | 3       |        |
|                             | Median          | 0,1     | 0,1     |        |
|                             | Q1-Q3           | 0.0-0.2 | 0.0-0.2 |        |
| RANKL (pmol/L) at 10 Months | n               | 2       | 0       | 0,860  |
|                             | Median          | 0,1     | .       |        |
|                             | Q1-Q3           | 0.1-0.2 | .-.     |        |
|                             | RANKL/OPG ratio |         |         |        |
| RANKL/OPG ratio at baseline | n               | 12      | 12      | 0,237  |
|                             | Median          | 0,1     | 0,1     |        |
|                             | Q1-Q3           | 0.0-0.1 | 0.0-0.1 |        |
|                             | n               | 10      | 7       |        |
| RANKL/OPG ratio at 2 Months | Median          | 0       | 0       | 0,526  |
|                             | Q1-Q3           | 0.0-0.0 | 0.0-0.0 |        |
|                             | n               | 6       | 5       |        |
|                             | Median          | 0       | 0       |        |
| RANKL/OPG ratio at 4 Months | Q1-Q3           | 0.0-0.0 | 0.0-0.0 | 0,927  |
|                             | n               | 4       | 5       |        |
|                             | Median          | 0       | 0       |        |
|                             | Q1-Q3           | 0.0-0.0 | 0.0-0.0 |        |
| RANKL/OPG ratio at 6 Months | n               | 4       | 5       | 0,903  |
|                             | Median          | 0       | 0       |        |
|                             | Q1-Q3           | 0.0-0.0 | 0.0-0.0 |        |
|                             | n               | 4       | 4       |        |
| RANKL/OPG ratio at 8 Months |                 |         |         | 0,665  |

|                              |        |           |           |        |
|------------------------------|--------|-----------|-----------|--------|
|                              | Median | 0         | 0         |        |
|                              | Q1-Q3  | 0.0-0.0   | 0.0-0.0   |        |
| RANKL/OPG ratio at 10 Months | n      | 4         | 3         | >0.999 |
|                              | Median | 0         | 0         |        |
|                              | Q1-Q3  | 0.0-0.0   | 0.0-0.0   |        |
| RANKL/OPG ratio at 12 Months | n      | 2         | 0         |        |
|                              | Median | 0         | .         |        |
|                              | Q1-Q3  | 0.0-0.0   | .-.       |        |
| <b>SOST (pmol/L)</b>         |        |           |           |        |
| SOST (pmol/L) at baseline    | n      | 12        | 12        | 0,194  |
|                              | Median | 58,7      | 40        |        |
|                              | Q1-Q3  | 40.8-66.0 | 35.4-64.4 |        |
| SOST (pmol/L) at 2 Months    | n      | 10        | 7         | 0,884  |
|                              | Median | 37,7      | 36,1      |        |
|                              | Q1-Q3  | 29.4-41.7 | 27.9-85.1 |        |
| SOST (pmol/L) at 4 Months    | n      | 6         | 5         | 0,784  |
|                              | Median | 40        | 32,8      |        |
|                              | Q1-Q3  | 25.0-45.8 | 29.7-33.2 |        |
| SOST (pmol/L) at 6 Months    | n      | 4         | 5         | 0,903  |
|                              | Median | 40        | 25,8      |        |
|                              | Q1-Q3  | 26.7-98.9 | 25.5-63.1 |        |
| SOST (pmol/L) at 8 Months    | n      | 4         | 4         | 0,665  |
|                              | Median | 26,7      | 35,2      |        |
|                              | Q1-Q3  | 22.0-46.7 | 23.7-78.7 |        |
| SOST (pmol/L) at 10 Months   | n      | 4         | 3         | 0,860  |
|                              | Median | 29        | 40,5      |        |
|                              | Q1-Q3  | 20.2-59.5 | 20.2-64.7 |        |
| SOST (pmol/L) at 12 Months   | n      | 2         | 0         |        |
|                              | Median | 27,8      | .         |        |
|                              | Q1-Q3  | 20.0-35.7 | .-.       |        |
| <b>Dkk1 (pmol/L)</b>         |        |           |           |        |
| Dkk1 (pmol/L) at baseline    | n      | 12        | 12        | 0,931  |
|                              | Median | 41,6      | 42,4      |        |
|                              | Q1-Q3  | 33.4-62.6 | 23.1-65.6 |        |
| Dkk1 (pmol/L) at 2 Months    | n      | 10        | 7         | 0,961  |
|                              | Median | 43,3      | 36,9      |        |
|                              | Q1-Q3  | 24.4-62.5 | 26.9-67.5 |        |
| Dkk1 (pmol/L) at 4 Months    | n      | 6         | 5         | 0,784  |
|                              | Median | 45,6      | 27,8      |        |
|                              | Q1-Q3  | 22.8-58.4 | 18.5-46.5 |        |
| Dkk1 (pmol/L) at 6 Months    | n      | 4         | 5         | >0.999 |
|                              | Median | 35,8      | 37        |        |
|                              | Q1-Q3  | 26.6-47.3 | 34.0-49.2 |        |
| Dkk1 (pmol/L) at 8 Months    | n      | 4         | 4         | 0,885  |
|                              | Median | 29,6      | 26,8      |        |
|                              | Q1-Q3  | 23.7-32.7 | 14.9-40.5 |        |
| Dkk1 (pmol/L) at 10 Months   | n      | 4         | 3         | 0,860  |
|                              | Median | 21,2      | 28,7      |        |
|                              | Q1-Q3  | 12.7-28.5 | 8.4-38.7  |        |
| Dkk1 (pmol/L) at 12 Months   | n      | 2         | 0         |        |



|                                |                          |             |             |        |
|--------------------------------|--------------------------|-------------|-------------|--------|
|                                | Median                   | 14,4        | .           |        |
|                                | Q1-Q3                    | 8.4-20.4    | .-.         |        |
|                                | <b>activin-A (pg/ml)</b> |             |             |        |
| activin-A (pg/ml) at baseline  | n                        | 12          | 12          | 0,583  |
|                                | Median                   | 652         | 609,6       |        |
|                                | Q1-Q3                    | 551.2-846.0 | 466.1-903.5 |        |
| activin-A (pg/ml) at 2 Months  | n                        | 10          | 7           | 0,071  |
|                                | Median                   | 503,1       | 390,4       |        |
|                                | Q1-Q3                    | 447.5-627.9 | 315.5-462.2 |        |
| activin-A (pg/ml) at 4 Months  | n                        | 6           | 5           | >0.999 |
|                                | Median                   | 443,5       | 412,5       |        |
|                                | Q1-Q3                    | 355.4-492.5 | 334.5-519.6 |        |
| activin-A (pg/ml) at 6 Months  | n                        | 4           | 5           | 0,903  |
|                                | Median                   | 372,8       | 388,3       |        |
|                                | Q1-Q3                    | 333.4-537.3 | 372.6-504.5 |        |
| activin-A (pg/ml) at 8 Months  | n                        | 4           | 4           | 0,312  |
|                                | Median                   | 325,2       | 451,8       |        |
|                                | Q1-Q3                    | 222.7-428.7 | 342.3-760.3 |        |
| activin-A (pg/ml) at 10 Months | n                        | 4           | 3           | 0,860  |
|                                | Median                   | 323,3       | 357,5       |        |
|                                | Q1-Q3                    | 282.1-415.1 | 201.0-422.7 |        |
| activin-A (pg/ml) at 12 Months | n                        | 2           | 0           |        |
|                                | Median                   | 287,5       | .           |        |
|                                | Q1-Q3                    | 256.8-318.2 | .-.         |        |
|                                | <b>CCL3 (ng/ml)</b>      |             |             |        |
| CCL3 (ng/ml) at baseline       | n                        | 12          | 12          | 0,157  |
|                                | Median                   | 71,7        | 80,8        |        |
|                                | Q1-Q3                    | 16.5-85.2   | 74.6-96.8   |        |
| CCL3 (ng/ml) at 2 Months       | n                        | 10          | 7           | 0,354  |
|                                | Median                   | 79,7        | 61,2        |        |
|                                | Q1-Q3                    | 39.0-95.5   | 44.0-71.2   |        |
| CCL3 (ng/ml) at 4 Months       | n                        | 6           | 5           | 0,121  |
|                                | Median                   | 62,3        | 69,6        |        |
|                                | Q1-Q3                    | 34.3-68.0   | 68.0-82.9   |        |
| CCL3 (ng/ml) at 6 Months       | n                        | 4           | 5           | 0,540  |
|                                | Median                   | 60,7        | 62,1        |        |
|                                | Q1-Q3                    | 30.1-70.3   | 61.3-71.1   |        |
| CCL3 (ng/ml) at 8 Months       | n                        | 4           | 4           | 0,885  |
|                                | Median                   | 57,7        | 59,3        |        |
|                                | Q1-Q3                    | 31.5-75.0   | 38.1-65.2   |        |
| CCL3 (ng/ml) at 10 Months      | n                        | 4           | 3           | >0.999 |
|                                | Median                   | 32,4        | 56          |        |
|                                | Q1-Q3                    | 11.6-55.7   | 3.3-57.9    |        |
| CCL3 (ng/ml) at 12 Months      | n                        | 2           | 0           |        |
|                                | Median                   | 34,1        | .           |        |
|                                | Q1-Q3                    | 3.9-64.3    | .-.         |        |

<sup>a</sup> Mann-Whitney U-test
